# Supplementary material
Source: Copernicus journal article supplement (doi:10.5194/essd-2026-287)
Supplement: Supplementary file 1 [file essd-2026-287-supplement.pdf]

1 **S1. Context**

2 The IPCC Special Report on Global Warming of 1.5°C (SR1.5), published in 2018, provided an assessment of the level of  
3 human-induced warming and cumulative emissions to date (Allen et al., 2018) and the remaining carbon budget (Rogelj et al.,  
4 2018) to support the evidence base on how the world is progressing in terms of meeting aspects of the Paris Agreement. The  
5 AR6 WGI Report, published in 2021, assessed past, current and future changes of these and other key global climate indicators,  
6 as well as undertaking an assessment of the Earth’s energy budget. It also updated its approach for estimating the human-  
7 induced warming and global warming level. In AR6 WGI and here, reaching a level of global warming is defined as the global  
8 surface temperature change, averaged over a 20-year period, exceeding a particular level of global warming, e.g. 1.5°C global  
9 warming. Given the current rates of change and the likelihood of reaching 1.5°C of global warming in the first half of the  
10 2030s (Lee J.-Y. et al., 2021; Lee et al., 2023; Riahi et al., 2022), it is important to have robust, trusted, and also timely climate  
11 indicators in the public domain to form an evidence base for effective science-based decision making.

12 **S2. Emissions**

13 **S2.1 Influence of the assessment approach and system boundaries on anthropogenic GHG emissions**

14 There are important differences in reporting conventions and system boundaries between assessments of total anthropogenic  
15 GHG emissions. These differences relate to the fact that emissions datasets vary in their coverage of sources and sectors; that  
16 there are different approaches to determining the “anthropogenic” component of LULUCF emissions and removals  
17 (particularly between bookkeeping and national inventory accounts); and that the Paris Agreement does not cover all relevant  
18 sources of emissions such as ozone depleting substances (ODS F-gases) and cement carbonation (Lamb et al., 2026). Table S1  
19 documents the datasets used for three assessment approaches presented in the main text, with further underlying detail on these  
20 approaches described in Lamb et al. 2026.

21

22 Table S1 The three GHG emissions estimates and their underlying datasets.

| Estimate     | Source                                           | Datasets  | Reference                   |
|--------------|--------------------------------------------------|-----------|-----------------------------|
| WGIII update | CO <sub>2</sub> -FFI and CO <sub>2</sub> -LULUCF | GCB v2025 | Friedlingstein et al., 2025 |

|                                   |                                                                                                      |                                                                                                                                         |                                                           |
|-----------------------------------|------------------------------------------------------------------------------------------------------|-----------------------------------------------------------------------------------------------------------------------------------------|-----------------------------------------------------------|
|                                   | CH <sub>4</sub> , N <sub>2</sub> O, UNFCCC F-gases                                                   | EDGAR v2025                                                                                                                             | Crippa et al. 2025                                        |
| WGIII update + additional sources | CO <sub>2</sub> -FFI, CO <sub>2</sub> -LULUCF, CH <sub>4</sub> , N <sub>2</sub> O and UNFCCC F-gases | As for WGIII update                                                                                                                     | Friedlingstein et al., 2025, Crippa et al. 2025           |
|                                   | Biomass fires (CH <sub>4</sub> and N <sub>2</sub> O)                                                 | GFED v5.1                                                                                                                               | van der Werf et al., 2025                                 |
|                                   | ODS F-gases                                                                                          | CIP v2025: Climate Indicators Project (this article), with underlying data from NOAA and AGAGE inversions (see Sect. 3 main manuscript) | Lan et al., 2025; Dutton et al., 2024; Prinn et al., 2018 |
|                                   | Cement carbonation                                                                                   | GCB v2025                                                                                                                               | Friedlingstein et al., 2025                               |
| Inventory aligned                 | CO <sub>2</sub> -FFI, CH <sub>4</sub> , N <sub>2</sub> O and UNFCCC F-gases                          | PRIMAP Hist-CR v2.7                                                                                                                     | Gütschow et al., 2025                                     |
|                                   | CO <sub>2</sub> -LULUCF                                                                              | JRC-NGHGI v2024                                                                                                                         | Melo et al. 2025                                          |

23

## 24 **S2.2 Changes to CO<sub>2</sub>-LULUCF in the Global Carbon Budget (GCB) v2025**

25 There were two substantial changes to the GCB in 2025. First, as part of a methodological update towards a consistent  
26 terrestrial carbon budget, it is now a precondition that the underlying bookkeeping models that inform estimates of CO<sub>2</sub>-  
27 LULUCF emissions use transient carbon densities, i.e., they consider the effects of environmental changes, such as  
28 atmospheric CO<sub>2</sub> increase and impacts of climate change, on vegetation and soil carbon densities (Gasser et al., 2020; Dorgeist  
29 et al., 2024). The inclusion of transient carbon densities increases gross fluxes for all gross CO<sub>2</sub>-LULUCF emission and  
30 removal terms. (For example, deforestation emissions are increased due to a larger standing biomass at the time of clearing  
31 because the transient effect of the rise in atmospheric CO<sub>2</sub> on plant growth is now considered in the CO<sub>2</sub>-LULUCF estimates.)  
32 For the net flux of CO<sub>2</sub>-LULUCF, this methodological change causes estimates to be slightly higher in the last three decades  
33 and the multi-decadal downward trend in net emissions to be smaller. A second and related change is that while GCB v2024

34 was based on four bookkeeping models (BLUE, OSCAR, H&C2023, LUCE), GCB v2025 is based only on three, because  
 35 H&C2023 does not consider transient carbon densities and it only provides data up to 2020. H&C2023 was thus no longer  
 36 used. This change in model ensemble causes estimates of CO<sub>2</sub>-LULUCF emissions to be somewhat lower.  
 37

### 38 **S2.3 Calculation of uncertainties and CO<sub>2</sub> equivalent emissions in Section 2**

39 We follow the same approach for estimating uncertainties and CO<sub>2</sub>-equivalent emissions as in AR6: CO<sub>2</sub>-equivalent emissions  
 40 were calculated using global warming potentials with a 100-year time horizon (GWP100 henceforth) from AR6 WGI Chap. 7  
 41 (Forster et al., 2021). Uncertainty ranges were based on a comparative assessment of available data and expert judgment,  
 42 corresponding to a 90 % confidence interval (Minx et al., 2021):  $\pm 8$  % for CO<sub>2</sub>-FFI,  $\pm 70$  % for CO<sub>2</sub>-LULUCF,  $\pm 30$  % for CH<sub>4</sub>  
 43 and F-gases, and  $\pm 60$  % for N<sub>2</sub>O (note that the GCB assesses 1 standard deviation uncertainty for CO<sub>2</sub>-FFI as  $\pm 5$  % and for  
 44 CO<sub>2</sub>-LULUCF as  $\pm 2.6$  GtCO<sub>2</sub>; Friedlingstein et al., 2025). The total uncertainty was summed in quadrature, assuming  
 45 independence of estimates per species/source. Reflecting these uncertainties, AR6 WGIII reported emissions to two significant  
 46 figures only. Uncertainties in GWP100 metrics of roughly  $\pm 10$  % were not applied (Minx et al., 2021).

### 47 **S3. Greenhouse gas concentrations**

48 Naming conventions and details for Sect. 3 of the main paper and herein follow AR6 WGI Chapter 2 (Gulev et al., 2021).

49 **Table S2 Annual mean concentrations of well-mixed greenhouse gases in 2025, 2024, 2023, 2019, 1850 and 1750. Except for CO<sub>2</sub>,  
 50 CH<sub>4</sub> and N<sub>2</sub>O, concentrations all are in parts per trillion by volume [ppt]. For halogenated gases, concentrations are stated for each  
 51 gas, with equivalents for HFCs, PFCs and Montreal gases given as the radiative equivalent of the most abundant gas in each category.**

| Greenhouse gas                 | 1750       | 1850       | 2019         | 2023         | 2024         | 2025         |
|--------------------------------|------------|------------|--------------|--------------|--------------|--------------|
| CO <sub>2</sub> [ppm]          | 278.4      | 285.6      | 410.1        | 419.4        | 422.8        | 425.6        |
| CH <sub>4</sub> [ppb]          | 729.2      | 807.6      | 1866.1       | 1921.7       | 1929.1       | 1935.9       |
| N <sub>2</sub> O [ppb]         | 270.1      | 272.1      | 332.1        | 336.9        | 338.0        | 339.4        |
| NF <sub>3</sub>                | 0.0        | 0.0        | 2.1          | 3.2          | 3.5          | 3.7          |
| SF <sub>6</sub>                | 0.0        | 0.0        | 9.9          | 11.4         | 11.8         | 12.2         |
| SO <sub>2</sub> F <sub>2</sub> | 0.0        | 0.0        | 2.5          | 2.9          | 3.0          | 3.1          |
| <b>HFCs as HFC-134a-eq</b>     | <b>0.0</b> | <b>0.0</b> | <b>237.4</b> | <b>303.5</b> | <b>321.3</b> | <b>338.1</b> |

|                                    |             |             |               |               |              |              |
|------------------------------------|-------------|-------------|---------------|---------------|--------------|--------------|
| HFC-134a                           | 0.0         | 0.0         | 107.6         | 129.5         | 134.7        | 140.3        |
| HFC-23                             | 0.0         | 0.0         | 32.8          | 37.0          | 37.8         | 38.9         |
| HFC-32                             | 0.0         | 0.0         | 19.4          | 33.8          | 38.6         | 42.2         |
| HFC-125                            | 0.0         | 0.0         | 29.6          | 44.2          | 48.6         | 52.3         |
| HFC-143a                           | 0.0         | 0.0         | 24.0          | 30.9          | 32.7         | 34.5         |
| HFC-152a                           | 0.0         | 0.0         | 7.1           | 7.4           | 7.7          | 7.8          |
| HFC-227ea                          | 0.0         | 0.0         | 1.6           | 2.3           | 2.5          | 2.6          |
| HFC-236fa                          | 0.0         | 0.0         | 0.2           | 0.2           | 0.3          | 0.3          |
| HFC-245fa                          | 0.0         | 0.0         | 3.1           | 3.7           | 3.8          | 3.9          |
| HFC-365mfc                         | 0.0         | 0.0         | 1.1           | 1.1           | 1.1          | 1.1          |
| HFC-43-10mee                       | 0.0         | 0.0         | 0.3           | 0.3           | 0.3          | 0.3          |
| <b>PFCs as CF<sub>4</sub>-eq</b>   | <b>34.1</b> | <b>34.1</b> | <b>109.7</b>  | <b>115.8</b>  | <b>117.3</b> | <b>118.9</b> |
| CF <sub>4</sub>                    | 34.0        | 34.0        | 85.5          | 89.4          | 90.4         | 91.3         |
| C <sub>2</sub> F <sub>6</sub>      | 0.0         | 0.0         | 4.8           | 5.2           | 5.3          | 5.4          |
| C <sub>3</sub> F <sub>8</sub>      | 0.0         | 0.0         | 0.7           | 0.8           | 0.8          | 0.8          |
| c-C <sub>4</sub> F <sub>8</sub>    | 0.0         | 0.0         | 1.8           | 2.0           | 2.1          | 2.1          |
| n-C <sub>4</sub> F <sub>10</sub>   | 0.0         | 0.0         | 0.2           | 0.2           | 0.2          | 0.2          |
| n-C <sub>5</sub> F <sub>12</sub>   | 0.0         | 0.0         | 0.1           | 0.2           | 0.2          | 0.2          |
| n-C <sub>6</sub> F <sub>14</sub>   | 0.0         | 0.0         | 0.2           | 0.2           | 0.2          | 0.2          |
| i-C <sub>6</sub> F <sub>14</sub>   | 0.0         | 0.0         | 0.1           | 0.1           | 0.1          | 0.1          |
| C <sub>7</sub> F <sub>16</sub>     | 0.0         | 0.0         | 0.1           | 0.1           | 0.1          | 0.1          |
| C <sub>8</sub> F <sub>18</sub>     | 0.0         | 0.0         | 0.1           | 0.1           | 0.1          | 0.1          |
| <b>Montreal gases as CFC-12-eq</b> | <b>8.5</b>  | <b>8.5</b>  | <b>1031.8</b> | <b>1004.0</b> | <b>995.7</b> | <b>989.0</b> |
| CFC-12                             | 0.0         | 0.0         | 503.0         | 487.3         | 483.2        | 479.4        |
| CFC-11                             | 0.0         | 0.0         | 226.2         | 216.8         | 214.5        | 212.1        |

|            |              |              |              |              |              |              |
|------------|--------------|--------------|--------------|--------------|--------------|--------------|
| CFC-113    | 0.0          | 0.0          | 69.8         | 67.2         | 66.6         | 66.0         |
| CFC-114    | 0.0          | 0.0          | 16.0         | 16.0         | 16.0         | 16.0         |
| CFC-115    | 0.0          | 0.0          | 8.7          | 8.9          | 9.0          | 9.0          |
| CFC-13     | 0.0          | 0.0          | 3.3          | 3.4          | 3.4          | 3.4          |
| CFC-112    | 0.0          | 0.0          | 0.4          | 0.4          | 0.4          | 0.4          |
| CFC-112a   | 0.0          | 0.0          | 0.1          | 0.1          | 0.1          | 0.1          |
| CFC-113a   | 0.0          | 0.0          | 0.9          | 1.3          | 1.4          | 1.5          |
| CFC-114a   | 0.0          | 0.0          | 1.0          | 1.0          | 1.0          | 1.0          |
| HCFC-22    | 0.0          | 0.0          | 246.7        | 247.3        | 245.3        | 245.5        |
| HCFC-141b  | 0.0          | 0.0          | 24.4         | 24.5         | 24.4         | 24.4         |
| HCFC-142b  | 0.0          | 0.0          | 22.2         | 21.2         | 21.0         | 20.7         |
| HCFC-133a  | 0.0          | 0.0          | 0.4          | 0.4          | 0.4          | 0.4          |
| HCFC-31    | 0.0          | 0.0          | 0.1          | 0.1          | 0.1          | 0.1          |
| HCFC-124   | 0.0          | 0.0          | 1.0          | 0.9          | 0.9          | 0.9          |
| CH3CCI3    | 0.0          | 0.0          | 1.6          | 1.0          | 0.9          | 0.7          |
| CCI4       | 0.0          | 0.0          | 78.0         | 73.9         | 73.0         | 72.0         |
| CH3Cl      | <b>457.0</b> | <b>457.0</b> | <b>541.4</b> | <b>536.5</b> | <b>543.8</b> | <b>538.6</b> |
| CH3Br      | 5.3          | 5.3          | 6.5          | 6.4          | 6.5          | 6.4          |
| CH2Cl2     | 6.9          | 6.9          | 40.6         | 45.3         | 48.7         | 49.7         |
| CHCl3      | 4.8          | 4.8          | 8.8          | 7.6          | 7.9          | 7.5          |
| Halon-1211 | 0.0          | 0.0          | 3.3          | 2.9          | 2.8          | 2.7          |
| Halon-1301 | 0.0          | 0.0          | 3.3          | 3.3          | 3.3          | 3.3          |
| Halon-2402 | 0.0          | 0.0          | 0.4          | 0.4          | 0.4          | 0.4          |

52

53 **S4. Short-Lived Climate Forcers (SLCFs)**

54 **Table S3 Emissions of the major SLCFs in 1750, 2019, 2022, 2023, 2024 and 2025 from a combination of CEDS and GFED and**  
55 **CAMS for the 2024-2025 trend. Provisional estimates used in Forster et al. (2023) and Forster et al. (2024) are shown. Emissions of**  
56 **SO<sub>2</sub>+SO<sub>4</sub> use SO<sub>2</sub> molecular weights. Emissions of NO<sub>x</sub> use NO<sub>2</sub> molecular weights. VOCs are for the total mass.**  
57

| Compound                                                                       | 1750  | 2019 (WGI) | 2019 (updated with CEDS v 2025_03-18 and GFEDv4) | 2022 (Forster et al., 2023) | 2022 (updated with CEDS v 2025_03-18 and GFEDv4) | 2023 (Forster et al., 2024) | 2023 (updated with CEDS v 2025_03-18 and GFEDv4) | 2024 (CEDS v 2025_03-18 and GFEDv4) | 2025 (CEDS v 2025_03-18 and GFEDv4) |
|--------------------------------------------------------------------------------|-------|------------|--------------------------------------------------|-----------------------------|--------------------------------------------------|-----------------------------|--------------------------------------------------|-------------------------------------|-------------------------------------|
| Sulphur dioxide (SO <sub>2</sub> ) + sulphate (SO <sub>4</sub> <sup>2-</sup> ) | 2.8   | 84.2       | 80.9                                             | 75.3                        | 70.6                                             | 79.1                        | 72.7                                             | 71.2                                | 69.1                                |
| Black carbon (BC)                                                              | 2.1   | 7.5        | 7.3                                              | 6.8                         | 6.7                                              | 7.3                         | 7.6                                              | 7.5                                 | 6.7                                 |
| Organic carbon (OC)                                                            | 15.5  | 34.2       | 33.0                                             | 25.8                        | 25.6                                             | 40.7                        | 41.0                                             | 36.1                                | 28.9                                |
| Ammonia (NH <sub>3</sub> )                                                     | 6.6   | 67.6       | 66.3                                             | 67.3                        | 66.8                                             | 71.1                        | 72.7                                             | 70.6                                | 68.9                                |
| Oxides of nitrogen (NO <sub>x</sub> )                                          | 19.4  | 141.7      | 133.6                                            | 130.4                       | 123.2                                            | 139.4                       | 128.4                                            | 130.4                               | 120.4                               |
| Volatile organic compounds (VOCs)                                              | 60.9  | 217.3      | 204.8                                            | 183.9                       | 176.4                                            | 228.1                       | 224.1                                            | 212.7                               | 184                                 |
| Carbon monoxide (CO)                                                           | 348.4 | 853.8      | 816.1                                            | 686.4                       | 665.4                                            | 917.5                       | 896.0                                            | 845.3                               | 693.2                               |

58

59

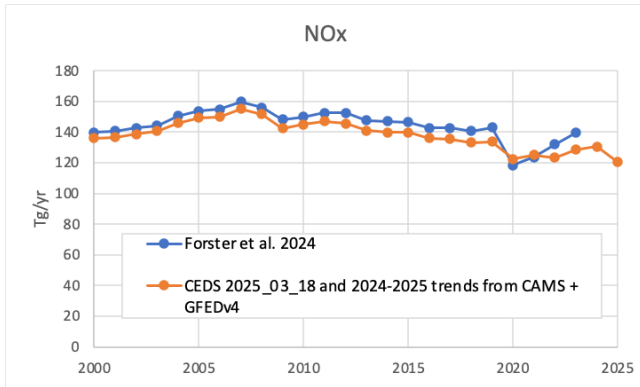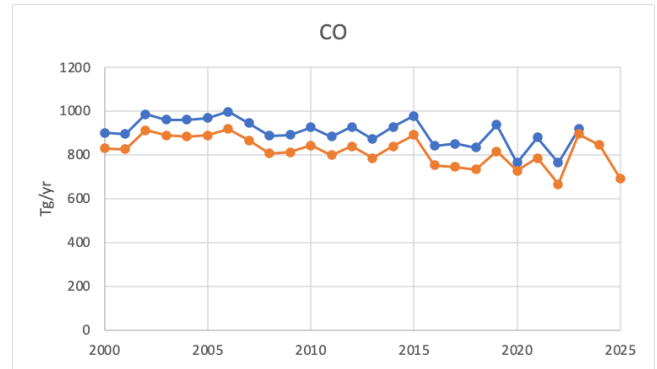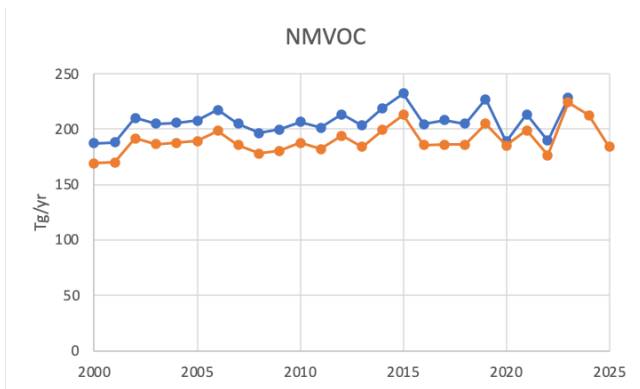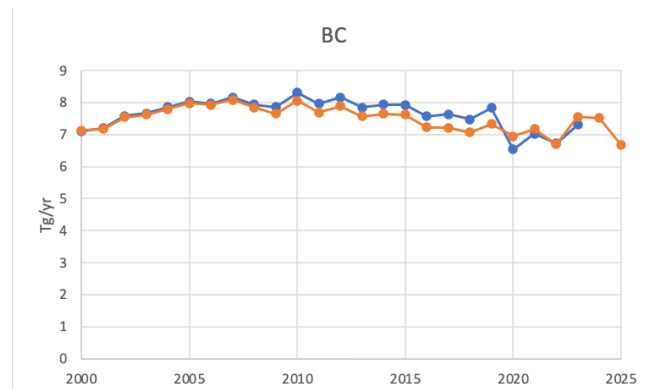

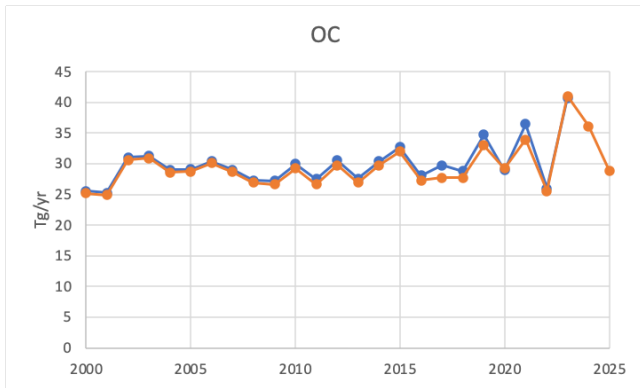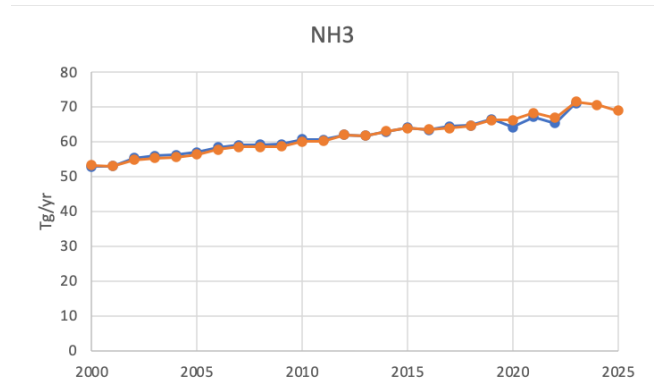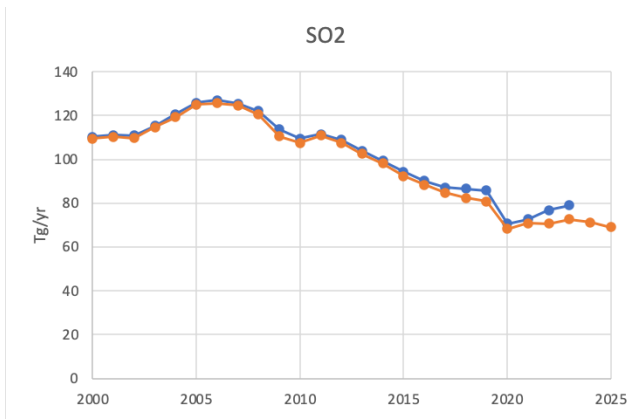

60 **Figure S1 Comparison of short-lived climate forcer emissions from Forster et al. (2024) (blue) and the most recent update of CEDS**  
 61 **and GFED through 2023, with 2024-2025 trend from CAMS (orange). (Granier et al., 2019; Jalkanen et al. 2012, 2016; Johansson**  
 62 **et al., 2017).**

63

64 **S5. Effective radiative forcing (ERF)**

65 **S5.1 Well-mixed greenhouse gas ERF methods**

66 Radiative forcing (RF) from CO<sub>2</sub>, CH<sub>4</sub> and N<sub>2</sub>O use the simplified formulas from concentrations in Meinshausen et al. (2020),  
 67 derived from an updated functional fit to Etminan et al. (2016) line-by-line radiative transfer results. These formulas are, to  
 68 first order, logarithmic with CO<sub>2</sub> concentrations and a square-root dependence for CH<sub>4</sub> and N<sub>2</sub>O, with additional corrections

69 and radiative band overlaps between gases. RF is converted to ERF using scaling factors (1.05, 0.86 and 1.07 for CO<sub>2</sub>, CH<sub>4</sub>,  
70 N<sub>2</sub>O respectively) that account for tropospheric and land-surface rapid adjustments (Smith et al., 2018a; Hodnebrog et al.,  
71 2020a). ERF from other GHGs is assumed to scale linearly with their concentration based on their radiative efficiencies  
72 expressed in W m<sup>-2</sup> ppb<sup>-1</sup> (Hodnebrog et al., 2020b, Smith et al., 2021b). A scaling factor translating RF to ERF is implemented  
73 for CFC-11 (1.13) and CFC-12 (1.12) (Hodnebrog et al., 2020a), whereas no model evidence exists to treat ERF differently to  
74 RF for other halogenated gases.

75

76 Relative uncertainties in the ERF for CO<sub>2</sub> (± 12%), CH<sub>4</sub> (± 20%) and N<sub>2</sub>O (± 14%) are unchanged from AR6. These stem from  
77 a combination of spectroscopic uncertainties and uncertainties in the adjustment terms converting RF to ERF; uncertainties in  
78 the volume mixing concentrations themselves are assessed to be small (Sect. 2). Uncertainties in the ERF from halogenated  
79 gases are treated individually and are assessed as ±19% for gases with a lifetime of 5 or more years and ±26% for shorter  
80 lifetime gases. In AR6, a ±19% uncertainty was applied to the sum of the ERF from all halogenated gases. To maintain a  
81 consistent uncertainty range across the sum of ERF from halogenated gases with AR6, we inflate the uncertainty in each  
82 individual gas by a factor of 2.05. Uncertainties are applied by scaling the full ERF time series for each gas.

## 83 **S5.2 Aerosol ERF methods**

84 Aerosol ERF is a combination of contributions from aerosol-radiation interactions (ERFari) and aerosol-cloud interactions  
85 (ERFaci).

### 86 **S5.2.1 Aerosol-radiation interactions**

87 Contributions to ERFari are assumed to scale linearly with certain SLCF emissions in Sect. 3 (SO<sub>2</sub>, BC, OC, NH<sub>3</sub>, NO<sub>x</sub> and  
88 VOC) or concentrations (CH<sub>4</sub>, N<sub>2</sub>O and ozone-depleting halocarbons) of primary aerosols and chemically active precursor  
89 species. The coefficients converting emissions or concentrations of each SLCF into ERF and its uncertainty come from Chapter  
90 6 of AR6 WGI (Szopa et al., 2021), originally from CMIP6 AerChemMIP models (Thornhill et al., 2021a). We scale these  
91 coefficients to reproduce the headline AR6 WGI ERFari assessment of -0.3 W m<sup>-2</sup> from 1750 to 2005-2014. Uncertainties are  
92 applied as a scale factor for each species and applied to the whole time series.

93

94 The inclusion of more species that affect ERFari differs from the AR6 WGI calculation of ERFari in Chapter 7, which only  
95 used SO<sub>2</sub>, BC, OC and NH<sub>3</sub> (Smith et al., 2021b). In the update, these four species remain the dominant aerosol and aerosol

96 precursors. Additionally, these coefficients have changed slightly due to switching to CMIP6 era data. In AR6, the coefficients  
97 scaling emissions to ERF for SO<sub>2</sub>, BC, OC and NH<sub>3</sub> were provided by CMIP5-era models (Myhre et al., 2013a). The additional  
98 coefficients and slight changes to their magnitude had an imperceptible effect on the results but have been included to align  
99 with current best practice. This might be important in future years as NO<sub>x</sub> and VOC precursors might make up a larger fraction  
100 of ERF<sub>ari</sub>.

### 101 **S5.2.2 Aerosol-cloud interactions**

102 ERF<sub>aci</sub> is estimated by assuming a logarithmic relationship with the change in cloud droplet number concentration (CDNC)  
103 as

$$104 \text{ERF}_{aci} = \beta \log(1 + \Delta\text{CDNC}) \quad (\text{S1})$$

$$105 \Delta\text{CDNC} = s_{\text{SO}_2}\Delta E_{\text{SO}_2} + s_{\text{BC}}\Delta E_{\text{BC}} + s_{\text{OC}}\Delta E_{\text{OC}} \quad (\text{S2})$$

106  
107 where  $s_{\text{SO}_2}$ ,  $s_{\text{BC}}$  and  $s_{\text{OC}}$  are sensitivities of the change in CDNC with the change in emissions of SO<sub>2</sub>, BC and OC respectively  
108 ( $\Delta E$ ). This relationship is fit to estimates of ERF<sub>aci</sub> in 13 CMIP6 models contributing results to the piClim-histaer and histSST-  
109 piAer experiments of RFMIP and AerChemMIP, respectively, to CMIP6 (Smith et al., 2024). The ERF<sub>aci</sub> in these 13 models  
110 is estimated using the Approximate Partial Radiative Perturbation (APRP) method (Taylor et al., 2007; Zelinka et al., 2014;  
111 Zelinka et al., 2023a).

112  
113  
114 The  $s_{\text{SO}_2}$ ,  $s_{\text{BC}}$  and  $s_{\text{OC}}$  values from each model are combined into a kernel density estimate and sampled 100,000 times to  
115 provide a CMIP6-informed distribution of these parameters. To obtain  $\beta$  for each sample given ( $s_{\text{SO}_2}$ ,  $s_{\text{BC}}$ ,  $s_{\text{OC}}$ ) a target ERF<sub>aci</sub>  
116 value for 1750 to 2005-2014 is drawn from the headline AR6 distribution of -1.0 [-1.7 to -0.3] W m<sup>-2</sup> and eq. (S1) rearranged.  
117 This follows a very similar procedure to AR6 and is based on Smith et al. (2021a) with three updates. Firstly, the relationships  
118 in eqs. (S1) and (S2) are slightly updated and simplified (Smith et al., 2024). Secondly, an additional two CMIP6 models have  
119 become available since the AR6 WG1 assessment which expands the sampling pool for coefficients from 11 to 13. Thirdly, a  
120 slight error in computing ERF<sub>aci</sub> from APRP from the CMIP6 models in Smith et al. (2021a) has been corrected (Zelinka et  
121 al., 2023b).

122  
123

### 124 **S5.3 Ozone ERF methods**

125 In AR6 WGI Chapter 7, the ozone ERF is derived from CMIP6 model-based estimates (Skeie et al., 2020) from 1850 to 2014,  
126 to infer the sensitivity of ozone RF to emissions of NO<sub>x</sub>, VOC and CO, concentrations of CH<sub>4</sub>, N<sub>2</sub>O and ozone-depleting  
127 halogens, and global mean surface temperature (GMST) anomaly. These factors can be found in Table 7.SM.3 of AR6. In  
128 CMIP6, experimental results that vary CO and VOC emissions separately are not available, so individual contributions from  
129 CO and VOC to the CO+VOC total are based on their fractional contributions from ACCMIP (CMIP5-era) models in  
130 Stevenson et al. (2013). To compute the ozone ERF we thus use the radiative efficiencies for ozone ERF and the scale factor  
131 to CH<sub>4</sub>, N<sub>2</sub>O and ozone-depleting halogens concentration changes discussed in the paper and CO, NMVOC and NO<sub>x</sub> emission  
132 changes discussed in the paper. For the global mean temperature contribution to ozone forcing (in terms of W m<sup>-2</sup> K<sup>-1</sup>), we  
133 use the model responses to ozone forcing per degree warming in chemistry-enabled models in abrupt-4xCO<sub>2</sub> experiments  
134 (Thornhill et al., 2021b), and apply this factor to the observed GMST anomaly from Sect. 7. Following AR6, we do not  
135 differentiate between stratospheric and tropospheric ozone, and we also assume that ERF is the same as RF as there is limited  
136 model evidence to suggest otherwise.

137

### 138 **S5.4 ERF from land use change and irrigation**

139 In Forster et al., (2024), ERF from land use and irrigation was scaled with cumulative CO<sub>2</sub> emissions from AFOLU from 1750,  
140 as the IPCC AR6 assessment from Ghimire et al. (2014) did not extend beyond 2005, and the IPCC assessment used cumulative  
141 AFOLU CO<sub>2</sub> emissions to estimate land use and irrigation ERF from 2005 to 2019. In Forster et al.(2025) onwards, we use  
142 land use transitions from the Land Use Harmonization v2 (LUH2) dataset (Hurtt et al., 2020) updated for the Global Carbon  
143 Budget (GCB) 2024 (Chini et al., 2021; Friedlingstein et al., 2025) using cropland and grazing land data from HYDE3.4 (Klein  
144 Goldewijk et al., 2017) that itself merges the latest FAO state-level data with MapBiomas satellite-based estimates for Brazil  
145 and Indonesia (Souza et al., 2020) and another recent estimate for China (Yu et al., 2022). This constitutes an update to the  
146 Ghimire et al. (2014) data that used LUH1, using the satellite-derived albedo-related parameters of Ouyang et al. (2022) and  
147 providing data for 1750-2023, which we extrapolate one year to 2024. The resulting global ERF is scaled by a factor of 1.28  
148 to recover the Ghimire et al. (2014) surface reflectance assessment of -0.15 W m<sup>-2</sup> in 2005 relative to 1750 to ensure consistency  
149 with the AR6. For irrigation, we assume the forcing scales with the area of land irrigated. We create a timeseries of this irrigated  
150 land area, using FAOSTAT (FAO, 2024) from 1961-2022, and Angelakis et al. (2021) to extend back to 1750. Angelakis et

151 al. (2021) provide data points from 1900 in their Figure 21, and give a value for 1800 in the text. We assume the 1800 value  
152 (8 megahectares as compared to 354 megahectares in 2022) applies to 1750 and apply a cubic spline fit to produce a time series  
153 of irrigated area from 1750 to 1961 which is scaled to match the 1961 FAOSTAT irrigated area. The irrigated area in 2019 is  
154 assumed to result in the AR6 assessment of irrigation forcing of  $-0.05 \text{ W m}^{-2}$  in 2019 (having its roots in Sherwood et al.,  
155 2018), and irrigation forcing is linear with irrigated area relative to this benchmark. We note that since the publication of AR6,  
156 more Earth System models incorporating transient historical irrigation are available (Yao et al., 2025), and could be used to  
157 provide an assessment of the ERF of irrigation in future.

### 158 **S5.5 ERF from other anthropogenic forcings**

159 Minor categories of anthropogenic forcings include contributions from land use and land use change other than via GHG  
160 emissions, aviation contrails and contrail-induced cirrus, stratospheric water vapour from methane oxidation, and light  
161 absorbing particles on snow and ice.

162  
163 The methodology to estimate ERF from land use and land-use change, including irrigation, has been updated to be more  
164 consistent with AR6 (Sect. 5) We anchor the 1750-2019 assessment to be the same as AR6 at  $-0.15 [-0.25 \text{ to } -0.05] \text{ W m}^{-2}$  for  
165 the ERF from surface albedo changes and  $-0.05 [-0.10 \text{ to } +0.05] \text{ W m}^{-2}$  for irrigation under this updated methodology.  
166 Stratospheric water vapour from methane oxidation was assessed to be  $0.05 [0.00 \text{ to } 0.10] \text{ W m}^{-2}$  in AR6 for 1750-2019, and  
167 is assumed to change linearly with changes in methane concentration.

168  
169 The ERF from light absorbing particles on snow and ice (LAPSI) is assumed to scale with emissions of black carbon. As in  
170 AR6, the contribution from brown carbon is assumed to be negligible. We align the coefficient that converts BC emissions to  
171 ERF from LAPSI to match the  $0.08 [0.00 \text{ to } 0.18] \text{ W m}^{-2}$  assessment in AR6 for 1750-2019.

172  
173 To estimate ERF from aviation contrails and contrail-induced cirrus in AR6, emissions of NO<sub>x</sub> from the aviation sector in  
174 CEDS were scaled to reproduce an ERF of  $0.0574 [0.019 \text{ to } 0.098] \text{ W m}^{-2}$  for 1750-2018 as assessed in Lee D. S. et al. (2021).  
175 We more closely follow the original methods of Lee D. S. et al. (2021) in this update to base our ERF estimates as closely as  
176 possible on aviation activity data. The Lee D.S. et al. (2021) ERF time series is extended to 2022 based on aviation fuel  
177 consumption from the International Energy Agency's (IEA) World Oil Statistics (2024). For 2023 and 2024, we use fuel  
178 consumption data from the International Air Transport Association (IATA, 2024).

## 179 **S5.6 Methods for estimating natural forcing**

180 Natural forcing is composed of solar irradiance and volcanic eruptions.

### 181 **S5.6.1 Solar irradiance**

182 The method to compute solar forcing is unchanged from AR6, using a composite time series prepared for PMIP4 (Jungclaus  
183 et al., 2017) and CMIP6 (Matthes et al., 2017). The headline assessment of solar ERF is based on the most recent solar cycle  
184 (2009-2019), which is unchanged from AR6. Solar ERF estimates are computed relative to complete solar cycles encompassing  
185 the full “pre-industrial” period where proxy data exists (6754 BCE to 1745 CE). The CMIP7 solar forcing time series for the  
186 historical period (1850–2023) is now available (Funke et al., 2024). However, it has changed from the CMIP6 time series and  
187 does not seamlessly transition to the pre-1850 period including the last several thousand years, nor does it extend forward to  
188 include 2024. In future editions of IGCC, the CMIP7 solar forcing product could be used if the data spans the appropriate  
189 periods.

### 190 **S5.6.2 Volcanic**

191 Volcanic ERF consists of contributions from stratospheric sulphate aerosol optical depth (sAOD; a negative forcing) and  
192 stratospheric water vapour (sWV, a positive forcing). The sAOD time series (at a nominal wavelength of 550 nm) is constructed  
193 from a combination of four datasets which have temporal overlap. We use ice-core deposition data from HolVol v1.0 (Sigl et  
194 al., 2022) for 9500 BCE to 1749 CE. For 1750 to 2023 we use the CMIP7 volcanic sAOD dataset (Durack et al., 2025) using  
195 the 550 nm spectral band, which is an update from IGCC 2023 that used the CMIP6 volcanic sAOD dataset. There is a seamless  
196 transition between HolVol and CMIP7 in 1750, so no blending of datasets was required. In previous editions of IGCC, we  
197 used the Global Space-based Stratospheric Aerosol Climatology (GloSSAC) product of sAOD which provided data until the  
198 penultimate year (Thomason et al., 2018), however, with the availability of the CMIP7 dataset to 2023, GloSSAC is not  
199 required directly in this year’s IGCC. Additionally, the CMIP7 dataset incorporates GloSSAC from 1979 to 2023. For 2024,  
200 we use the Ozone Mapping and Profiling Limb Profiler (OMPS LP) Level 3 aerosol optical depth at 745 nm, which is scaled  
201 to achieve the same time mean sAOD as GloSSAC v2.22 (Kovilakam et al., 2020) in the overlapping 2013-2023 period as a  
202 single Ångström exponent is not suggested for this conversion. The 745 nm band from OMPS-LP is used as this is reported to  
203 be more stable than the bands closer to 550 nm from OMPS LP (Taha et al., 2021). For comparison we estimate the 550 nm  
204 sAOD from GloSSAC v2.22 using the 525 nm band and an Ångström exponent of -2.33, and we find good correspondence to

205 the CMIP7 sAOD time series for the 1979-2023 common period. Therefore, while GloSSAC is not used directly this year, it  
206 is used as an anchor and reference for both the CMIP7 and OMPS-LP datasets. sAOD is converted to a radiative effect using  
207 a scaling factor of  $-20 \pm 5$  as in AR6 (Smith et al., 2021b) that is representative of CMIP5 and CMIP6 models. ERF is calculated  
208 with reference to the change in this radiative effect since “pre-industrial”, defined as the mean of all available years before  
209 1750 CE. In other words, the mean of the pre-1750 period is defined as zero forcing.

210

211 The January 2022 eruption of Hunga Tonga-Hunga Ha’apai (HTHH) was an exceptional episode in that it emitted large  
212 amounts of water vapour into the stratosphere (Millán et al., 2022; Sellitto et al., 2022). Jenkins et al. (2023) determined the  
213 HTHH eruption increased volcanic ERF in 2022 by  $+0.12 \text{ W m}^{-2}$  due to sWV. In IGCC 2024 we update this value from  
214 Jenkins et al. (2023), which used an idealised injection of water vapour, to use direct satellite retrievals of water vapour from  
215 the Microwave Limb Sounder (MLS) data on board the Aura platform. Using the MLS data in place of the Jenkins et al. (2023)  
216 spatial distribution, we update the 2022 volcanic sWV ERF to  $+0.14 \text{ W m}^{-2}$ , and find that in the MLS data the stratospheric  
217 water vapour plume persists into 2023 ( $+0.18 \text{ W m}^{-2}$ ) and 2024 ( $+0.15 \text{ W m}^{-2}$ ) (Fig. S2). These water vapour forcings are  
218 calculated in a similar fashion to in Jenkins et al. (2023), by implementing the stratospheric water vapour in 2022, 2023 and  
219 2024 from MLS against a climatology derived from MLS using the 2004-2021 years. The instantaneous radiative forcing at  
220 the tropopause is calculated using the SOCRATES radiative transfer model (Edwards and Slingo, 1996), against a background  
221 climatology (atmospheric temperatures, humidity, cloud profiles, ozone profiles, surface albedo and surface temperature) taken  
222 from ECMWF ERA5 reanalysis (Hersbach et al., 2020). From the CMIP7 and GloSSAC data the peak addition of stratospheric  
223 aerosols was around 0.007 optical depth units in the global mean, resulting in a peak volcanic aerosol forcing of  $-0.14 \text{ W m}^{-2}$   
224 in mid-2022 relative to the pre-HTHH baseline that decayed away with an e-folding lifetime of around 18 months. We conclude  
225 using this analysis that the net HTHH ERF from both sAOD and sWV was positive (but small) in 2022, 2023 and 2024, and  
226 attempting to back out HTHH from other small eruptions gives a best estimate ERF for HTHH in isolation of  $+0.03 \text{ W m}^{-2}$  in  
227 2022,  $+0.10 \text{ W m}^{-2}$  in 2023 and  $+0.10 \text{ W m}^{-2}$  in 2024. This is in contrast to other studies that assess a net negative (Gupta et  
228 al., 2025) or zero (Schoeberl et al., 2024) impact of HTHH, using different methods.

229

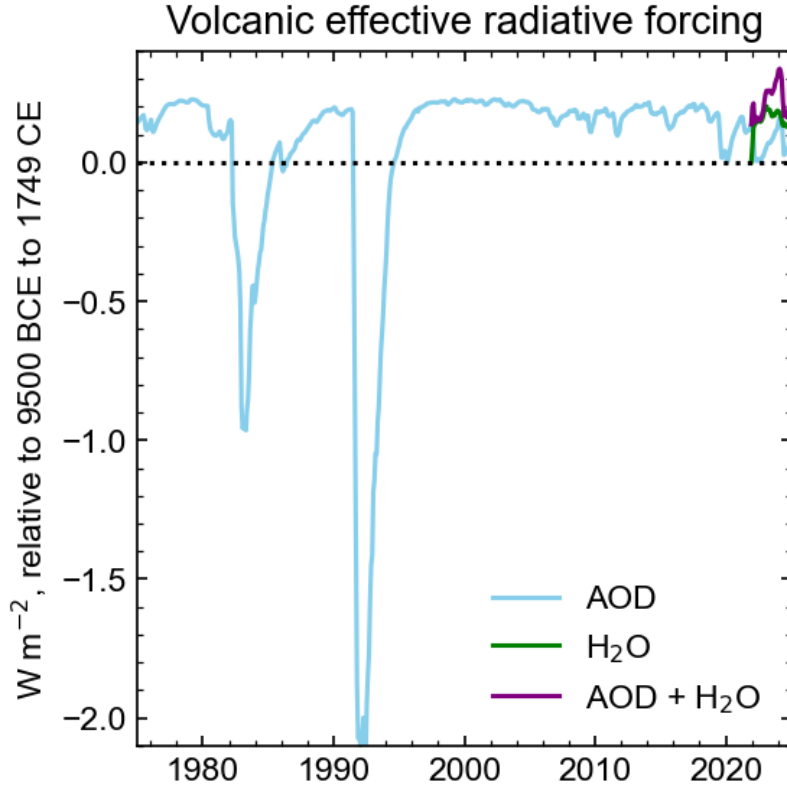

230

231 **Figure S2 Volcanic effective radiative forcing from 1975 to present relative to the pre-1750 baseline. The impact of including**  
 232 **stratospheric water vapour from Hunga Tonga-Hunga Ha’apai (green) can be observed in 2022, 2023 and 2024 by increasing the**  
 233 **net volcanic ERF above the background level (purple).**

234

235 Following the approach of Shine et al. (1990, see their Figure 2.3), we display (Fig. S3) the decadal contributions to radiative  
 236 forcing (computed as the difference from decade to decade of the decadal mean ERF, per species, in Wm<sup>-2</sup>) between the 1960s  
 237 and 2020s. Over those decades, while the overall forcing continues to be dominated by CO<sub>2</sub>, this analysis points in particular  
 238 to the recent positive and increasing (compared to the previous respective decades) impact of aerosol decline. This is directly  
 239 related to the changes in emissions over the last two decades (Section 2 of main paper). In addition, this analysis clearly shows  
 240 that the climate forcing from halogens has almost peaked. In addition, over the last three decades, the rate of increase of N<sub>2</sub>O

241 forcing has become commensurate with CH<sub>4</sub> and O<sub>3</sub>, reflecting its recent rapid growth. Consistent with the findings of Figure  
 242 8 (also S13), we see a slight recent decrease in the total anthropogenic forcing trend over the 2020s compared to the 2010s.  
 243

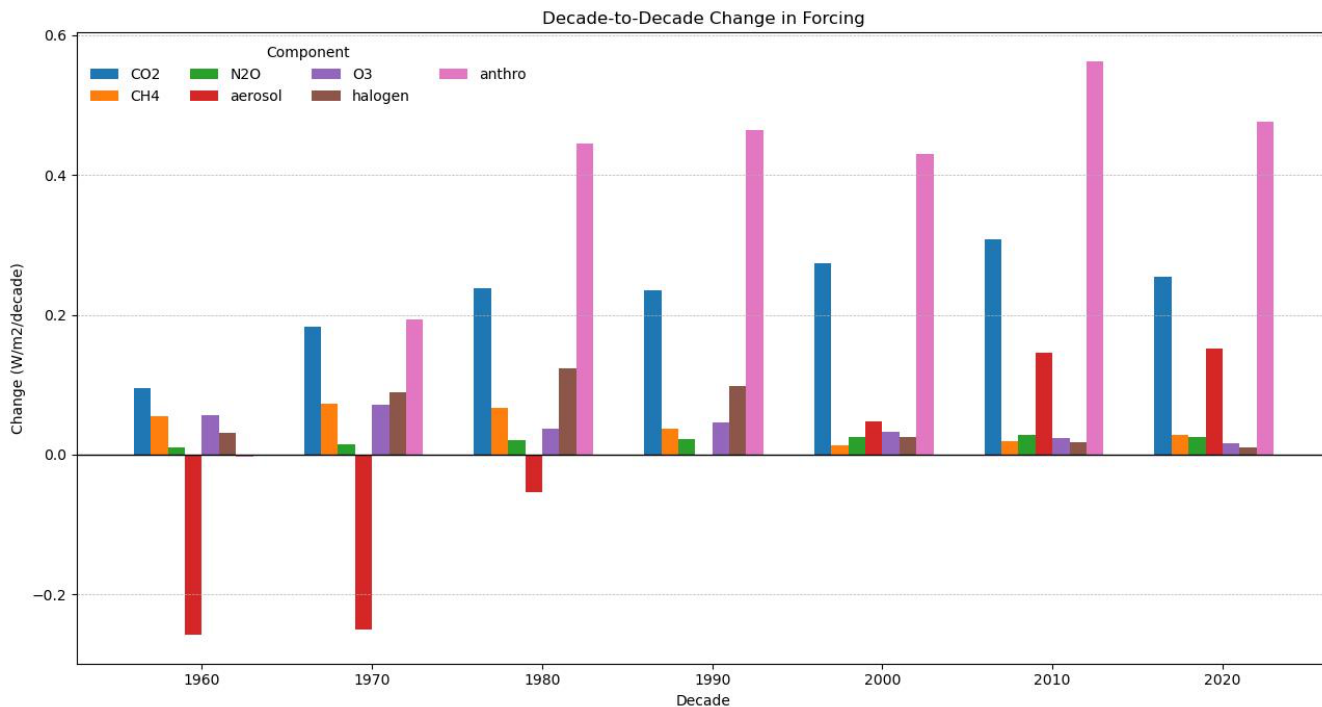

244  
 245 **Figure S3 Decade to decade change in ERF.**

246

247 **S5.7 Emissions-driven ERF and temperature assessment**

248 When generating Figure 6 in the main text, a number methodological adjustments were applied to the base FaIR 1.45  
 249 parameterizations to make it more consistent with the AR6 WG1 Figure 6.12 approach. The CO lifetime sensitivity of CH<sub>4</sub>  
 250 was set to 0.0002 based on multi-model estimates (Fiore et al., 2009; Wild et al., 2001), enabling the model to capture the CO-  
 251 OH-CH<sub>4</sub> pathway. Oxidation CO<sub>2</sub> from the atmospheric conversion of CH<sub>4</sub>, CO, and VOCs to CO<sub>2</sub> (~2.0 Gt CO<sub>2</sub>/yr) was  
 252 injected as additional emissions in each scenario, following the convention in AR6 of attributing this secondary CO<sub>2</sub> to the

253 emitting species rather than to the CO<sub>2</sub> row. For aerosol compounds (SO<sub>2</sub>, BC, OC), the decomposition of aerosol-cloud  
254 interactions used fixed median parameter-based fractions rather than individual counterfactuals, and temperature contributions  
255 were derived from ERF scaled by each ensemble member's transient climate response to forcing, in both cases to avoid  
256 propagating poorly constrained aerosol-cloud interaction parameters. Results are broadly consistent with the AR6 assessed  
257 values, with the largest differences arising from the longer effective methane lifetime in FaIR's calibrated constrained ensemble  
258 (which is required to make emissions match historical concentrations) that results in a negative NO<sub>x</sub> ozone forcing due to the  
259 NO<sub>x</sub>-OH-CH<sub>4</sub> feedback, as well as the inclusion of some additional feedbacks (e.g. temperature effects on ozone and CO<sub>2</sub>,  
260 black carbon albedo effects on snow and ice) that were not assessed in the AR6 Figure 6.12.

261

## 262 **S6. Earth energy imbalance**

263 While changes in EEI have been effectively monitored at the top of the atmosphere by satellites since the mid-2000s, we rely  
264 on estimates of OHC change to determine the absolute magnitude of EEI and its evolution on inter-annual to multi-decadal  
265 time series. The AR6 assessment of ocean heat content change for the 0–2000 m layer was based on global annual mean time  
266 series from five ocean heat content datasets: IAP (Cheng et al., 2017), Domingues et al. (2008), EN4 (Good et al., 2013), JMA  
267 (Ishii et al., 2017) and NCEI (Levitus et al., 2012). Four of these datasets routinely provide updated OHC time series for the  
268 BAMS State of the Climate report, and all are used for the GCOS Earth heat inventory (von Schuckmann et al., 2020, 2023a)  
269 and the annual WMO State of the Global Climate report. The uncertainty assessment for the 0–2000 m layer used the ensemble  
270 method described by Palmer et al. (2021) that separately accounts for parametric (referred to in the plots below as “mapping  
271 uncertainty”) and structural uncertainty. The OHC change >2000 m and associated uncertainty were assessed based on trend  
272 analysis of the available hydrographic data following Purkey and Johnson (2010). A full propagation of uncertainties across  
273 all heat inventory components depends on the specific choice of time period, and different estimates are not directly  
274 comparable. Therefore, we take a simple pragmatic approach, using the total ocean heat content uncertainty as a proxy for the  
275 total uncertainty, since this term is 2 orders of magnitude larger than the other terms (Forster et al., 2021). To provide estimates  
276 of the EEI up to the year 2024, we scale up the values of OHC change in 2021, 2022, 2023, 2024 and 2025 to reflect the 91 %  
277 contribution of the ocean to changes in the Earth heat inventory (Forster et al., 2021). The EEI is then simply computed as the  
278 difference in global energy inventory over each period, converted to units of watts per square metre ( $\text{W m}^{-2}$ ) using the surface  
279 area of the Earth and the elapsed time. The uncertainties in the global energy inventory for the end-point years are assumed to

280 be independent and added in quadrature, following the approach used in AR6 (Forster et al., 2021). Estimates of EEI should  
 281 also account for the other elements of the Earth heat inventory, i.e. the atmospheric warming, the latent heat of global ice loss  
 282 and heating of the continental land surface (Forster et al., 2021; Cuesta-Valero et al., 2021, 2023a; Steiner et al., 2020; Nitzbon  
 283 et al., 2022a; Vanderkelen et al., 2020; Adusumilli et al., 2022). Some of these components of the Earth heat inventory are  
 284 routinely updated by a community-based initiative reported in von Schuckmann et al. (2020, 2023a). However, in the absence  
 285 of annual updates to all heat inventory components, a pragmatic approach is to use recent OHC change as a proxy for EEI,  
 286 scaling the value up as required based on historical partitioning between Earth system components. The CERES EBAF-TOA  
 287 Ed4.2.1 data presented in the manuscript were downloaded from [https://ceres-tool.larc.nasa.gov/ord-  
 288 tool/jsp/EBAFTOA421Selection.jsp](https://ceres-tool.larc.nasa.gov/ord-tool/jsp/EBAFTOA421Selection.jsp) on 25th March 2026. Since OHC timeseries were computed from annual means and  
 289 therefore centred on the year mid-points, we computed the average heating rates from CERES based on July-to-June averages.  
 290  
 291

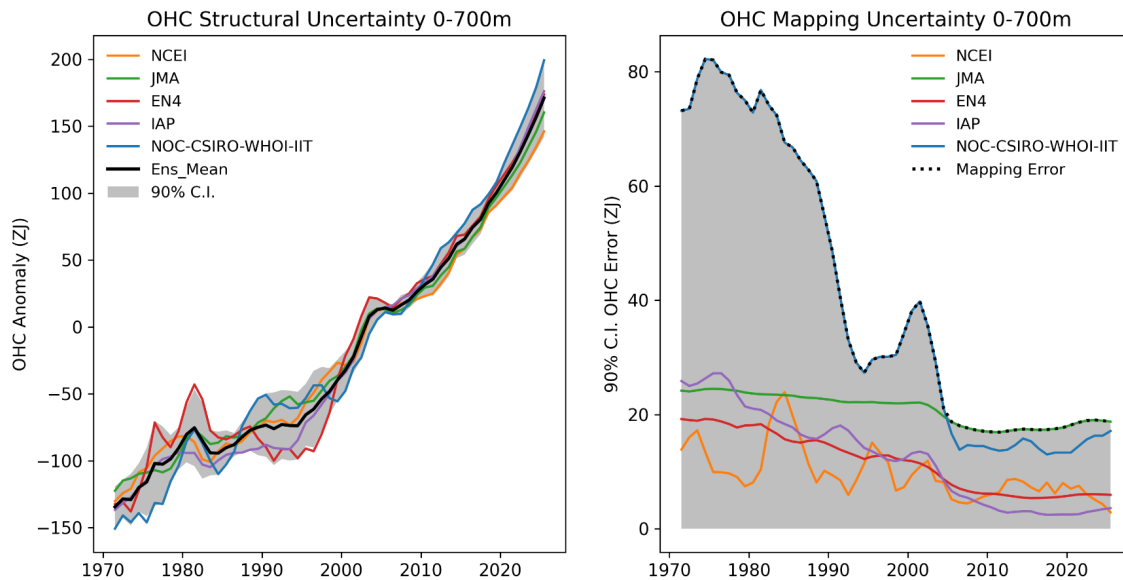

292  
 293 **Figure S4 (Left) Ocean heat content timeseries for the 0-700 m layer with the estimate of structural uncertainty indicated by the**  
 294 **grey shaded region and expressed as a 90% confidence interval (*very likely* range) in units of Zetta Joules ( $1 \text{ ZJ} = 10^{21}$  Joules). (Right)**  
 295 **Individual estimates of the mapping uncertainty with the ensemble mapping uncertainty (the maximum across all available**

296  
297

estimates) shown by the dotted line and grey shaded region. Mapping uncertainty is expressed as a 90% confidence interval (*very likely range*) in units of Zetta Joules ( $1 \text{ ZJ} = 10^{21} \text{ Joules}$ ).

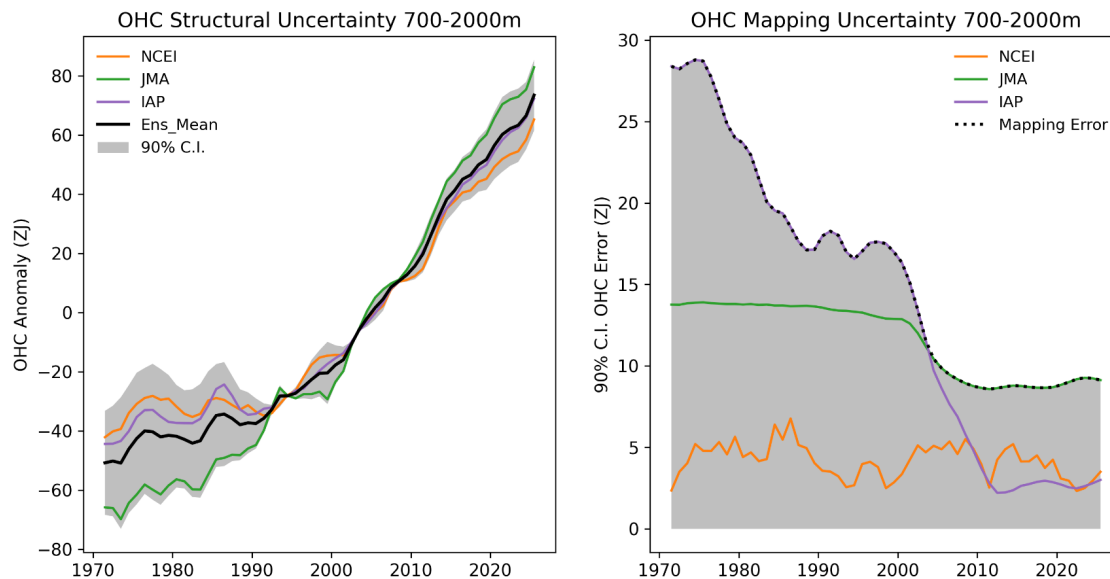

298  
299

Figure S5 As Fig. S4 but for ocean heat content in the 700-2000 m layer.

### 300 S7. Global surface temperature

301 Surface temperature information on land and sea is available with low latency through WMO distribution channels, with  
302 monthly station data from a substantial number of stations reported within a few days of the end of the month. Sea-surface  
303 temperature data from ships and buoys are gathered from the Global Telecommunication System with a short delay. These are  
304 consolidated into global data sets by a number of institutions, making it feasible to report GMST updates within a few weeks  
305 of the end of the period of interest. The number of reporting locations on land with near-real time data available for reporting  
306 for the most recent periods is typically less than that available for historical data, as not all observation sites report recent data  
307 reliably, but this lower observation density only slightly increases the uncertainty in estimates of recent annual GMST  
308 compared with the past 20-30 years (Trewin et al., 2021).  
309

310 The GMST assessment in AR6 was largely based on four datasets: HadCRUT5 (Morice et al., 2021), Berkeley Earth (Rohde  
311 and Hausfather, 2020), NOAAGlobalTemp - Interim (Vose et al., 2021) and Kadow et al. (2020). The four GMST datasets  
312 were chosen by virtue of being quasi globally complete, having data back to 1850, using the most recent generation of SST  
313 analyses and using analysed (rather than climatological) values over sea ice. The first two of these are routinely updated  
314 operationally, with data for each year becoming available in the first few weeks of the following year. NOAAGlobalTemp -  
315 Interim was not updated operationally at the time AR6 was published, became NOAA's main operational GMST dataset (under  
316 the name NOAAGlobalTemp 5.1) as of January 2023, but has now been superseded by NOAAGlobalTemp 6.0.0 (Yin et al.,  
317 2024), which is used in this paper. All three datasets are updated and published monthly. The dataset by Kadow et al. is updated  
318 on an ad hoc basis by the authors (Kadow et al., 2025). A fifth data set, China - Mean Surface Temperature (China-MST) (Sun  
319 et al., 2021), which meets all the GMST dataset criteria except for treatment of sea ice areas, is used both in AR6 and here for  
320 global temperatures over land areas only. Although the version of the Kadow et al. (2020) dataset reported in that paper used  
321 HadCRUT4 as its base, the version used in AR6 and subsequently used HadCRUT5 as its base (Kadow et al., 2025)..

322  
323 NOAAGlobalTemp 6.0.0 uses a new artificial neural network approach to reconstruct temperatures over land (Huang et al.,  
324 2022) in place of the empirical orthogonal teleconnection approach used in version 5.1. This change has little impact on long-  
325 term trends at global scale since the low-frequency component in the land surface air temperature (LSAT) reconstruction has  
326 not changed, but has a substantial impact on spatial and short-term temporal variability. Version 6.0.0 shows approximately  
327 0.01 °C less warming from 1850-1900 to recent time periods (such as 2013-2022) than version 5.1, principally due to  
328 differences in the early part of the 1850-1900 baseline period. A new version of the NOAAGlobalTemp dataset (6.1.0), using  
329 the newly-developed ERSST sea surface temperature analysis (v6) (Huang et al., 2025), became the operational NOAA data  
330 set as of January 2026 but is not used in this paper.

331  
332 During 2025, Berkeley Earth transitioned to a new data set version, with 0.25° resolution compared with the previous 1°, and  
333 with the interpolation approach now trained on the spatial structure and relationship of ERA5 fields, rather than kriging (Rohde  
334 et al., in prep). The new data set version is somewhat warmer over land in the early part of the record than its predecessor, and  
335 hence is warmer over the 1850-1900 period. As a result, the new version of the Berkeley Earth dataset (as implemented in this  
336 paper) shows 1.73 °C of warming over land from 1850-1900 to 2015-2024, compared with 1.82 °C in the previous version.  
337 Changes in warming over the ocean between the two versions are negligible. For GMST the warming over this period for the

338 old and new versions is 1.26 °C and 1.22 °C respectively. The GMST impact of this version change is the largest of any version  
 339 change in the data sets used in this paper since AR6, and contributes approximately -0.01 °C to the overall GMST assessment.  
 340

341 To date, all four GMST datasets remain supported.. Version changes to date since AR6 have resulted in the warming from  
 342 1850-1900 to 2011-2020 being 0.01 °C less in the most recent dataset versions than that reported in AR6 (Table S4), with  
 343 warming of land areas being 0.02 °C less than in AR6 and warming of ocean areas being identical. .  
 344

345 **Table S4. Observed warming (central estimate) from 1850-1900 to various time periods in current dataset editions,**  
 346 **AR6, and earlier IPCC Assessment Reports (where applicable)**  
 347  
 348

| Time period | Observed warming from 1850-1900 (central estimate, °C) |                              |                            |
|-------------|--------------------------------------------------------|------------------------------|----------------------------|
|             | Current datasets                                       | AR6                          | Earlier Assessment Reports |
| 2011-2020   | 1.08                                                   | 1.09                         |                            |
| 2006-2015   | 0.93                                                   | 0.94                         | 0.87 (SR1.5)               |
| 2003-2012   | 0.89                                                   | 0.90                         | 0.78 (AR5)                 |
| 1981-2010   | 0.68                                                   | 0.69 (not formally reported) |                            |

349  
 350 A new version of the China-MST dataset (v3.0) has been developed and is used as part of the land component of the assessment  
 351 of this paper. The land component of this uses the C-LSAT 2.1 dataset (Xu et al., 2025). Compared with earlier versions, C-  
 352 LSAT 2.1 has substantially more stations and a substantially greater areal data coverage, as well as new homogenisation  
 353 methods. China-MST v3.0 shows more warming over the common 1850-1900 to 2014-2023 period than the v2.0 version used  
 354 in 2023 and earlier, with warming of 1.61 °C in v3.0 compared with 1.53 °C in v2.0. This change brings China-MST into  
 355 closer alignment with the other four datasets although it still shows the least amount of warming of the five.  
 356

357 The key differences between the AR6 datasets and those used in the annual WMO and BAMS State of the Climate reports are  
358 that WMO and BAMS also incorporate reanalyses (ERA5 and JRA-3Q, which superseded JRA-55 during 2024). These reports  
359 also include the GISTEMP (Lenssen et al., 2019) dataset (excluded by AR6 because it starts in 1880) but do not include the  
360 dataset by Kadow et al. (as that is not updated operationally). In its 2025 State of the Climate report, WMO also incorporated  
361 the China-MST dataset for GMST, and two additional datasets which have been published in the last two years,, CMA-GMST  
362 (Chen et al., 2025) and DCENT-I (Chan et al., 2025). WMO also, rather than calculating values directly with respect to a 1850-  
363 1900 baseline, initially calculates values with respect to a 1981-2010 baseline and then adds to that the 0.69 °C change from  
364 1850-1900 to 1981-2010 assessed by AR6 (WMO, 2026). This approach allows the inclusion of reanalyses, and other data  
365 sets which do not extend back to 1850.

366

367 The GMST values used in AR6 were calculated from the gridded data sets produced by the data providers, using a consistent  
368 methodology - calculating the mean anomaly for each of the northern and southern hemisphere as a latitude-weighted mean of  
369 available gridpoint values, then defining the global mean anomaly as the mean of the two hemispheric values. (This is  
370 equivalent to the method used by the Met Office Hadley Centre to report global values from HadCRUT5). The values thus  
371 calculated may differ from those reported by the data providers themselves, due to different averaging methodologies and  
372 treatment of missing data. This difference was most evident historically for the Berkeley Earth dataset although it is less  
373 pronounced for the latest version of the dataset than for previous versions. Although the difference is less pronounced in the  
374 AR6 datasets than in earlier generations of datasets, there are more gridpoints with missing data in the Southern Hemisphere  
375 than the Northern (particularly before an observation network was established on Antarctica in the 1950s), and using  
376 hemispheric means ensures that the two hemispheres are equally weighted.

377

378 The uncertainty assessment in AR6 combines the spread of the individual datasets with uncertainties derived from ensembles  
379 for HadCRUT5 and an earlier version of NOAA GlobalTemp, with the other two datasets assumed to have the same uncertainty  
380 as HadCRUT5. HadCRUT5 is the only one of the datasets for which regularly updated ensembles are currently produced,  
381 limiting the extent to which uncertainty assessments can be regularly updated from those used in AR6. In this update it was  
382 assumed that the width of the confidence interval for each individual dataset was the same as that used in AR6.

383

384 There is an ongoing review of the datasets used in global temperature assessment, both in forthcoming versions of this  
385 publication (and ultimately the IPCC AR7) and in WMO reporting.

386

387 **2023-2025 global mean temperature anomalies**

388 2023 set a new global annual-mean surface temperature change record, with a best estimate of 1.44 °C, beating 2016 by 0.16  
389 °C. 2024 surpassed this, reaching 1.52 +/- 0.13 °C; 2024, becoming the first calendar year on record more likely than not  
390 exceeding 1.5 °C (Fig. 7 main paper). The assessed uncertainty range is based on that in AR6 WGI (Gulev et al., 2021). All  
391 four individual datasets are well inside the range (ranging from 1.46 to 1.56 °C). Natural drivers and internal variability are  
392 expected to modulate human-caused warming at interannual-to-decadal timescales. These values are not inconsistent with  
393 AR6, which estimated the effect of internal variability in any single year be +/- 0.25 °C based on CMIP6 models.

394

395 The probability of seeing an observed temperature of 1.51 °C in 2024 considering a human-induced warming equal to 1.36 °C  
396 is about 1 chance out of 6 (Fig. S6b). The methodology to calculate this probability consists in comparing the GSAT observed  
397 anomaly to those expected from CMIP6 models following the framework adopted in AR6 in Chapter 3 (Eyring et al., 2021)  
398 for decadal trends and adapted here for interannual time scale issues. The same probability but conditional to the fact that 2024  
399 followed an El Niño year and that the Atlantic Multidecadal Variability (AMV) was in a positive phase, rises to 1 chance out  
400 of 2. Even if 2024 has been perceived as “extreme”, it can in fact be treated as a “normal” year, i.e. very much expected at the  
401 actual human-caused global warming level when the internal modes of variability are taken into account and when assessed  
402 from a very large number of simulations from large ensembles. Based on the same calculation, we estimate that a year as warm  
403 as 2023 would occur once in 4 years at human-induced warming equal to 1.31 °C (Fig. S6b). It drops to 1-in-14 [10-20, CI 5-  
404 95%] year event, i.e. a rare-to-exceptional event, when considering that 2023 followed a La Nina year and despite persistent  
405 positive AMV. Note that the probability of the large jump in global temperatures was increased by the fact that the El Niño  
406 followed an extended La Niña over 2020-2022 (Raghuraman et al., 2024, Mex et al. 2026). Within such a framework, 2022,  
407 that was colder than human-induced warming, could be interpreted as a normal/expected year considering that 2021 was a La  
408 Nina year and AMV positive (Fig. S6b). These results show that human induced warming combined with particular modes of  
409 natural variability shifts the odds of global surface temperatures passing 1.5 °C, making it more likely in presence of El Nino.

410

GSAT interannual anomalies distribution from CMIP6 for evolutive anthropogically-forced warming (ANT\_GWL) and conditional to the combined phases of OND [yr-1] ENSO and AMV modes of variability

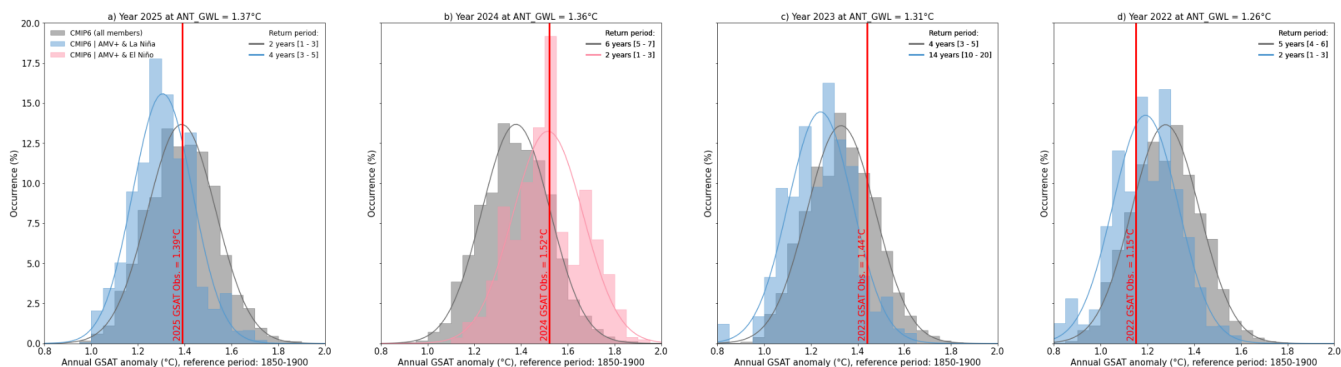

411  
412

413 **Figure S6 a) Gray histograms of global surface air temperature (GSAT) interannual anomalies estimated from 15 CMIP6 models**  
 414 **extracted from all available SSP scenarios (~700 members) at anthropogenic global warming levels (ANT\_GWL) corresponding to**  
 415 **a) 2025 b) 2024, c) 2023, d) 2022. The red vertical bar stands for the observational consolidated GSAT annual anomalies (Sect. 7.1).**  
 416 **The return period of the observed annual GSAT event estimated from the CMIP6 distribution is provided (upper-corner).**  
 417 **Associated [5-95%] likely range is assessed through bootstrapping. Interannual anomalies are obtained following Trewin (2022)**  
 418 **method over 10-yr sliding windows. Only models providing large-ensembles (n members >5) and having at least one member whose**  
 419 **interannual variance of GSAT is compatible with observational estimates, are selected. Colored histograms stand for the same**  
 420 **distribution but conditional to the combined phase of El Niño Southern Oscillation (ENSO) and Atlantic Multidecadal Variability**  
 421 **(AMV). SST Anomalies for the modes of variability are calculated from the residual of SST obtained after removing the modelled**  
 422 **forced response estimated as model ensemble mean. A year is considered as an El Niño/La Niña year if the (October-December)**  
 423 **relative Oceanic Niño Index (RONI) index of the previous year is greater/lower than one standard deviation. A year is considered**  
 424 **as an AMV+ year if the annual North Atlantic average SST is greater than one standard deviation. Light pink represents years when**  
 425 **RONI and AMV are concomitantly positive and light-blue when RONI is negative.**

426  
427  
428  
429  
430  
431

The increase in global temperature between 2022 and 2023 and in particular in global sea surface temperature is exceptional based on model estimates accounting for projected known human and natural forcings plus internal variability (Rantanen and Laaksonen, 2024; Terhaar et al., 2025, Cattiaux et al., 2024). The La Niña-to-El Niño sequence is of key importance and has been likely reinforced by enhanced energy uptake due to multi-year persistence in the preceding La Niña. The temporal synchronicity between the modes of variability in all basins is hypothesized to have played a role in the jump (Minobe et al.,

432 2025) with the North Atlantic being record warm (Guinaldo et al., 2025) and the austral sea ice extent being record low (Purish  
433 and Doddridge, 2023).

434

435 Possible specific causes beyond internal variability, many of which are already accounted for in the estimated human-induced  
436 warming level, have been postulated e.g.: International Maritime Organization rules on shipping fuel sulphur content that came  
437 into force in January 2021; the eruption of Hunga Tonga Hunga Ha’apai in January 2022 and other subsequent smaller volcanic  
438 activity; and a faster-than-expected onset of Solar Cycle 25. A key diagnostic of these changes including both external forcing  
439 and internal variability was the exceptional magnitude of the net energy increase into the Earth system from mid-2022 to mid-  
440 2023, driven in large part by the reduced reflectance and greater absorption of solar radiation (Hodnebrog et al., 2024;  
441 Goessling et al., 2024; Minobe et al. 2025; Allan and Merchant, 2025), which may be influenced by cloud feedbacks  
442 (Tselioudis et al., 2024) as well as surface reflectance and atmospheric composition change (see also Sect. 6 main paper).

443

444 We provide an updated estimate of the contribution of different factors to anomalous global mean surface temperatures in  
445 2023, 2024, and 2025 (Fig. S7) by combining the results of recent studies with paired FaIR climate model simulations (Leach  
446 et al., 2021). Temperature residuals are calculated relative to an expected warming trend estimated by fitting a locally weighted  
447 regression (LOWESS, smoothing fraction = 0.2) to the IGCC composite GMST dataset through 2022, then extrapolating to  
448 2023-2025 using a 20-year quadratic trend. This yields residuals of +0.22 °C in 2023, +0.27 °C in 2024, and +0.13 °C in 2025.  
449 These residuals differ from the approach taken in Fig. S6, as it is intended to exclude the forced response from recent changes  
450 in aerosol, solar, and volcanic outputs and allow for an explicit accounting of their role in recent warming. This is not a full  
451 attribution study; the results are presented with associated caveats to provide a possible explanation of the anomalous  
452 temperatures in 2023-2025 relative to prior years. A similar analysis formed part of the WMO 2025 State of the Global Climate  
453 report (WMO, 2025).

454

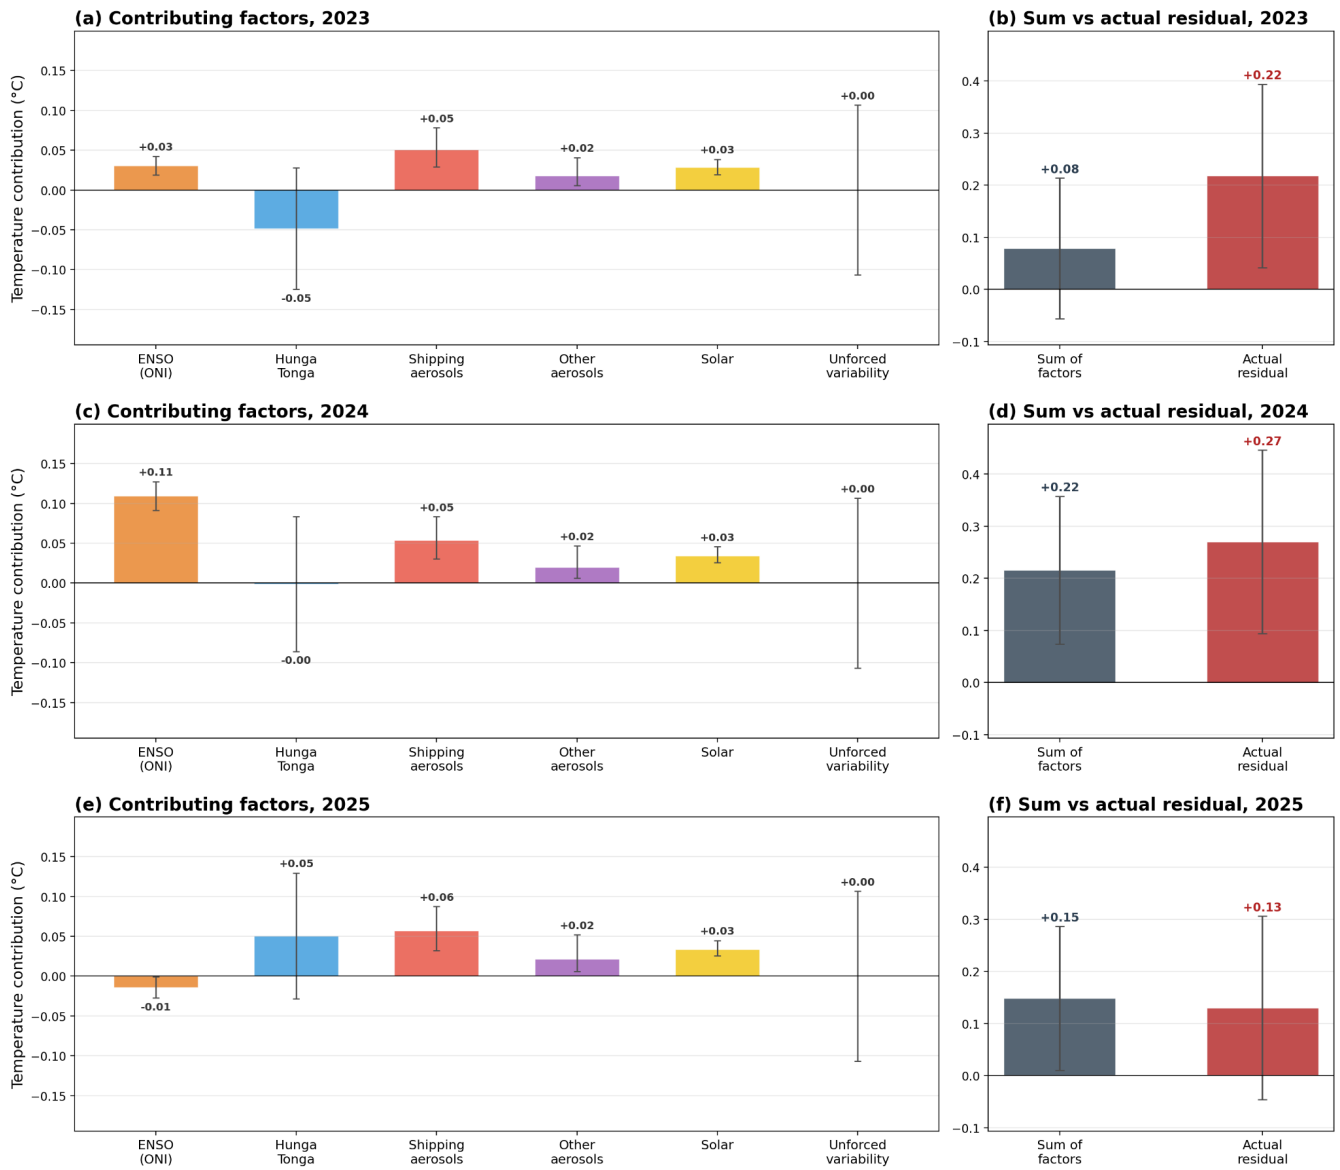

455

456 **Figure S7 Assessed contributions to 2023, 2024, and 2025 global mean surface temperature anomalies above the smoothed expected**  
 457 **trend. Left panels (a, c, e): Individual factor contributions (°C) with 5-95% uncertainty ranges for ENSO (ONI-based regression),**  
 458 **the Hunga Tonga–Hunga Ha'apai eruption, IMO 2020 shipping aerosol reductions, non-shipping SO<sub>2</sub> emission changes (since 2019),**

459 solar cycle 25 (since 2019 minimum), and the climatological range of unforced internal variability. Right panels (b, d, f): Comparison  
460 of the sum of the five estimated forced factors (dark, with combined uncertainty added in quadrature) against the observed  
461 temperature anomaly (red). Aerosol-related factors (shipping and non-shipping SO<sub>2</sub>) reflect declines in emissions that were  
462 previously masking warming. Error bars represent 5-95% confidence intervals.

463

464 The impact of ENSO on the temperatures can be estimated in multiple ways. Here we estimate it using a quadratic regression  
465 of FaIR-detrended GMST (e.g. GMST minus expected warming from a FaIR model run using historical emissions data) against  
466 the Oceanic Niño Index (ONI) over the 1951-2022 training period, following a 3-month optimal lag (Foster and Rahmstorf  
467 2026). This suggests an impact of +0.03 °C, +0.11 °C and -0.01 °C for 2023, 2024 and 2025 respectively (95% CI, ±0.013 °C).  
468 In addition, we calculate the residual unforced variability in annual GMST not attributable to ENSO effects (e.g. modes of  
469 variability in other basins like AMV and other internal climate variability) in Fig. S7 (labelled “Unforced variability”). The  
470 generalized ENSO signal produced by this approach may not reflect the dynamics of any individual event, and there is some  
471 indication in the literature that the 2023 El Niño had somewhat unique characteristics that led to earlier GMST increases than  
472 is typically seen (Mex et al., 2026). Results from pre-industrial control climate model simulations (Raghuraman et al., 2024)  
473 suggest a transition from triple-dip La Niña to El Niño can produce an anomalous jump of up to 0.25 °C in the year of transition,  
474 though it is unclear how to apply this to 2023 since one would need to condition the effect on the ENSO change that was  
475 actually experienced.

476

477 The IMO regulation change in 2020 led to a rapid reduction of approximately 8.4 TgSO<sub>2</sub>/yr and a step change in radiative  
478 forcing. Using a random-effects meta-analysis of eight studies – Gettelman et al., 2024; Jordan and Henry, 2024; Quaglia and  
479 Visoni, 2024; Yoshioka et al., 2024; Yuan et al., 2024; Watson-Parris et al., 2024; Skeie et al., 2024; and Hansen et al., 2025  
480 – the pooled central forcing is 0.14 W/m<sup>2</sup>, with individual study estimates ranging from 0.075 W/m<sup>2</sup>, (Skeie et al.) to 0.50  
481 W/m<sup>2</sup>, (Hansen et al., something of an outlier at approximately four times the median of other studies). The estimated  
482 temperature impacts using FaIR are +0.05 °C (5–95% CI: +0.03 to +0.08 °C) in 2023, +0.05 °C (+0.03 to +0.08 °C) in 2024,  
483 and +0.06 °C (+0.03 to +0.09 °C) in 2025, with Hansen et al. accounting for the upper tail. Excluding Hansen et al., estimates  
484 are approximately one-third lower (+0.03–0.04 °C).

485

486 Global non-shipping SO<sub>2</sub> emissions have declined substantially, driven primarily by Chinese coal regulation, US and EU clean  
487 air policies, and industrial efficiency improvements (CEDS 2025). This long-term decline has already been partially absorbed

488 into the background warming trend. Using a since-2019 baseline to isolate the contribution most relevant to the 2023–2025  
489 anomaly (and to avoid double-counting with the shipping aerosol estimate), paired FaIR simulations yield additional warming  
490 of +0.02 °C (5–95% CI: +0.005 to +0.04 °C) in 2023, +0.02 °C (+0.006 to +0.05 °C) in 2024, and +0.02 °C (+0.006 to +0.05  
491 °C) in 2025 from continued land-based SO<sub>2</sub> reductions. The larger long-running decline since the mid-2000s peak (~0.09 °C  
492 by 2025) is not included in the primary estimate as it is largely captured by the LOWESS trend baseline.

493  
494 The Hunga Tonga-Hunga Ha'apai (HTHH) eruption injected both SO<sub>2</sub> (~0.4 Tg) and an unprecedented ~150 Tg of water vapor  
495 into the stratosphere up to 56 km altitude (Schoeberl et al., 2024). Unlike typical eruptions, HTHH transitions from net cooling  
496 (SO<sub>2</sub> aerosol-dominated) to net warming (stratospheric H<sub>2</sub>O-dominated) over multi-year timescales. Based on a 30-member  
497 WACCM6-MAM coupled-ocean ensemble (SPARC HTHH Atmospheric Impacts Report, Bednarz et al., 2026), the estimated  
498 surface temperature impact is -0.05 °C (±0.15 °C, 5–95% CI) in 2023, near-zero at -0.001 °C (±0.17 °C) in 2024, and +0.05  
499 °C (±0.16 °C) in 2025. The sign change from 2023 to 2025 reflects the growing dominance of the stratospheric water vapor  
500 greenhouse effect as aerosol cooling wanes. Multi-model structural uncertainty is approximately ±50% based on comparisons  
501 across available models (SPARC, Table 7.4).

502  
503 Solar cycle 25 has been significantly stronger than initial forecasts, with sunspot numbers reaching ~155 in 2024 compared to  
504 predictions of ~120 and leading to total solar irradiance values that substantially exceed earlier projections. Using the NOAA TSI  
505 CDR calibrated against FaIR's solar forcing over 2000-2015, and paired FaIR runs relative to a cycle-neutral 2015–2019  
506 baseline, the estimated surface warming contribution since the 2019-2020 solar minimum is +0.03 °C (5–95% CI: +0.02 to  
507 +0.04 °C) in 2023, +0.03 °C (+0.03 to +0.05 °C) in 2024, and +0.03 °C (+0.03 to +0.04 °C) in 2025.

508  
509 In total, the sum of identified factors – ENSO (ONI-based), Hunga Tonga, shipping aerosol reductions, non-shipping SO<sub>2</sub>  
510 reductions, and solar cycle 25 – falls within the 5–95% uncertainty range of the observed residual anomaly for all three years:  
511 the combined estimate is +0.08 °C in 2023 (observed: +0.22 °C), +0.22 °C in 2024 (observed: +0.27 °C), and +0.15 °C in  
512 2025 (observed: +0.13 °C). The smaller unexplained residual in 2024 and 2025 compared to 2023 partly reflects the large  
513 positive ENSO contribution in 2024 and the onset of La Niña in 2025. The gap remaining in 2023 likely reflects unusual  
514 behavior of the 2023 El Niño (Raghuraman et al., 2024; Minobe et al., 2025; Mex et al., 2026) as well as unforced internal  
515 variability beyond ENSO, including the record-warm North Atlantic (Guinaldo et al., 2025) and anomalously low Antarctic

516 sea ice extent. While ENSO, solar, and volcanic effects are expected to be transient, the warming unmasked by declining  
517 shipping and land-based aerosol emissions will persist as a sustained contribution to global temperatures in coming years.  
518

## 519 **S8 Human-induced global warming**

### 520 **S8.1 Defining of warming**

#### 521 **S8.1.2 Definitions of global warming in the IPCC sixth assessment cycle**

522 Tracking progress towards the long-term global goal to limit warming, in line with the Paris Agreement, requires the  
523 assessment of both what the current level of global surface temperatures are and whether a level of global warming, such as  
524 1.5 °C, is being reached (Thorne et al., 2026). Definitions for these were not specified in the Paris Agreement, and several  
525 ways of tracking levels of global warming are in use. When determining whether warming thresholds have been passed, both  
526 AR6 and SR1.5 adopted definitions that depend on future warming; in practice, levels of current warming were therefore  
527 reported in AR6 and SR1.5 using additional definitions that circumvented the need to wait for observations of the future  
528 climate.

529  
530 AR6 defined crossing-time for a level of global warming as the midpoint of the first 20-year period during which the average  
531 observed warming for that period exceeds that level of warming (see AR6 WGI Chapter 2 Box 2.3) (the level of warming for  
532 a given year defined in this way is therefore not known until 10 years after that year). AR6 therefore reported current levels of  
533 both observed and human-induced warming as their averages over just the most recent 10 years (which gives warming that  
534 lags by only 5 years instead of 10 years) (see AR6 WGI Chapter 3 their Sect. 3.3.1.1.2); we refer to this definition as the “AR6  
535 decade-average” warming.

536  
537 SR1.5 defined the level of warming in a given year as the average human-induced warming, in GMST, of a 30-year period  
538 centred on that year; when the given year is the current year, SR1.5 specified that the future 15 years (required for the mean)  
539 are revealed by extrapolating the multidecadal trend (see SR1.5 Chapter 1, their Sect. 1.2.1); we refer to this definition as the  
540 “SR1.5 trend-based” warming. If the multidecadal trend is interpreted as being linear (which it has been very close to over  
541 recent decades), this definition of current warming is equivalent to the end-point of the trend line through the most recent 15

542 years of human-induced warming, and therefore provides a definition of warming for the current year that only depends on  
543 historical warming and does not lag. This interpretation produces results that in recent years have been identical (or extremely  
544 close) to the current annual mean value of human-induced warming (see results in Sect. 8.2, and Supplement Sect. S8.3), so  
545 in practice the attribution assessment in SR1.5 was based not on the trend-based definition, but on the simple annual-year  
546 attributed warming; we refer to this definition as the “SR1.5 annual-mean” warming.

547  
548 A diagram of these three definitions is given in Fig. S12.

549

### 550 **S8.1.2 Estimates of global surface temperature: GMST and GSAT in attributed warming assessments**

551 AR6 WGI (Chap. 2 Cross-Chap. Box 2.3, Gulev et al., 2021) described how global mean surface air temperature (GSAT), as  
552 is typically diagnosed from climate models, is physically distinct from the global mean surface temperature (GMST) estimated  
553 from observations, which generally combine measurements of near-surface temperature over land , with measurements of  
554 sea surface temperature over the ocean. Gulev et al. (2021) assessed with high confidence that long-term trends in the two  
555 indicators differ by less than 10 %. However, based on conflicting lines of evidence from climate models and direct  
556 observations, the former showing stronger warming of GSAT compared to GMST, the latter tending to show the opposite,  
557 there is low confidence in the sign of the difference in trends. Therefore, with medium confidence, in AR6 WGI Chap. 3  
558 (Eyring et al., 2021), the best estimates and likely ranges for attributable warming expressed in terms of GMST were assessed  
559 to be equal to those for GSAT, which means that the AR6 attributable warming assessment does not distinguish between  
560 GMST and GSAT. As such, while WGI Chap. 3 (Eyring et al., 2021) treated estimates of attributable warming in GSAT and  
561 GMST from the literature together without any rescaling, we note that climate-model-based estimates of attributable warming  
562 in GSAT are expected to be systematically higher than corresponding estimates of attributable warming in GMST (see e.g.  
563 Cowtan et al., 2015; Richardson et al., 2018; Beusch et al., 2020; Gillett et al., 2021). Therefore, given an opportunity to update  
564 these analyses from AR6, it is more consistent and more comparable with observations of GMST to report attributable changes  
565 in GMST using all three methods (described in Sect. S7). The SR1.5 assessment of attributable warming was given in terms  
566 of GMST, which is continued here. Therefore, in line with Sect. 7, AR6 WGI, and SR1.5, we adopt GMST as the estimate of  
567 global surface temperature. Findings are presented in Figs. S7, S9 and S9 and Tables S5 and S6.

568

## 570 **S8.2 Methods to estimate human-induced warming**

571 Both SR1.5 and AR6 drew on evidence from a range of literature for their assessments of human-induced warming, before  
572 selecting results from a smaller subset to produce a quantified estimate. While both the SR1.5 and AR6 assessments used the  
573 latest Global Warming Index (GWI) results (Haustein et al., 2017), AR6 also incorporated results from two other methods,  
574 regularised optimal fingerprinting (ROF) (as in Gillett et al., 2021) and kriging for climate change (KCC) (as in Ribes et al.,  
575 2021). In AR6, all three methods gave results consistent not only with each other but also results from AR6 WGI Chap. 7 (see  
576 WGI Chap. 7 Supplementary Material (Smith et al., 2021b), Fig. 3.8 of AR6 WGI Chap. 3 (Eyring et al., 2021), and Figs. S7,  
577 S8 and S9). Note that the results from Chap. 7 were not included in the AR6 WGI final calculation because they were not  
578 statistically independent of other methods. Of the methods used, two (Gillett et al., 2021; Ribes et al., 2021) relied on CMIP6  
579 DAMIP (Gillett et al., 2016) simulations which ended in 2020 and hence require modifications to update to the most recent  
580 years. The other two methods (Haustein et al., 2017; Smith et al., 2021b) are fully updatable and can also be made consistent  
581 with other aspects of the AR6 assessment and methods. The three methods used in the final assessment of contributions to  
582 warming in AR6 are used again with revisions for this annual update and are presented here along with any updates to their  
583 approaches.

### 584 **S8.2.1 Global Warming Index**

585 Introduced in Otto et al. (2015), and refined with full uncertainty assessment in Haustein et al. (2017), the Global Warming  
586 Index (GWI) quantifies anthropogenic warming by using an established “multi-fingerprinting” approach to decompose total  
587 warming into its various components; preliminary anthropogenic and natural warming time series are first estimated from  
588 radiative forcings, and a multivariate linear regression is then taken between these preliminary GMST contributions and  
589 observed GMST, with the best fit providing the attributed anthropogenic and natural contributions to warming. As such, the  
590 GWI attribution method is directly tied to observations and therefore the resulting central estimate for human-induced warming  
591 has a relatively small dependence on the size of the uncertainties in climate sensitivity and forcing.

592

593 Substantive annual updates to the GWI assessment depend on annual updates for effective radiative forcings (ERFs) and  
594 observed temperature (GMST), both of which are provided as a part of this update (Sects. 5 and 7 respectively). The remaining  
595 inputs to the GWI assessment are updated at the less-frequent CMIP cadence; however, these contributions only weakly

596 influence the GWI results. Further, by recomputing a “historical-only” GWI time series based only on data up to a given year,  
597 it can be shown that GWI is relatively insensitive to end-date or short-term fluctuations in observed GMST, minimising  
598 potential confusion about the current level of warming, such as the perception of a hiatus or acceleration (see AR6 WGI  
599 Chapter 3 Cross-Chapter Box 3.1, Eyring et al., 2021), due to short-term internal variability. This, combined with the  
600 conceptual simplicity of the method, makes the GWI a relatively transparent and robust method for attributing anthropogenic  
601 warming and well-suited to providing reliable annual updates.

602  
603 Where the GWI method previously separated warming contributions into two components, “anthropogenic” and “natural”, and  
604 independently attributed them, this update further separates and independently attributes contributions within the  
605 Anthropogenic component, adopting the groupings from AR6: “well-mixed greenhouse gases”, “other human forcings” and  
606 “natural forcings”. The climate response model used to estimate (pre-regression) warming from radiative forcing is updated  
607 from the AR5 Impulse Response model (AR5-IR; from AR5 Chapter 8 Supplement (Myhre et al., 2013b)) used in Haustein et  
608 al. (2017) to the Finite-amplitude Impulse Response model (FaIR; Leach et al., 2021; Smith et al., 2018b; Millar et al., 2017),  
609 which was used in SR1.5 and AR6; climate response uncertainty is included by using around 30 sets of parameters that  
610 correspond to FaIR emulating the CMIP6 ensemble, as provided in Leach et al. (2021). The updated historical ERF input to  
611 FaIR is given in Sect. 5, with uncertainty accounted for using a representative 1000-member probabilistic ensemble. Observed  
612 GMST and its uncertainty are provided by the 200-member ensemble of the annually updated HadCRUT5 (Morice et al., 2021;  
613 see Sect. 7). Uncertainty from internal variability is accounted for by using between 100-200 realisations of internal variability  
614 sampled from the CMIP6 piControl simulations (Nicholls et al., 2021). Since some CMIP6 models may have unrealistically  
615 high decadal variability, our estimates of uncertainty may be conservative (Eyring et al., 2021). Here, to partly address this,  
616 piControl timeseries are first filtered, removing simulations that drift by more than 0.15 °C per decade or exhibit unrealistic  
617 variability amplitudes. The parameters for FaIR (given in Leach et al., 2021) are tuned to GSAT outputs from CMIP6; the  
618 outputs from FaIR are not rescaled to account for the difference between GSAT and GMST in the tuning since any rescaling  
619 would be immediately and completely regressed out in the next step of the attribution process; this lack of rescaling is  
620 additionally broadly consistent with the AR6 assessment which concluded with medium confidence that GSAT and GMST  
621 are representative of each other – see Sect. S8.1. In future, FaIR could be re-tuned to GMST estimates from CMIP6 in addition  
622 to GSAT outputs to examine potential differences in the response that cannot be accounted for through a linear rescaling,  
623 though differences in the final attribution results from such a study are expected to be minimal; the regression onto HadCRUT5  
624 provides the strongest constraint.

625

626 Producing the GWI ensemble with ~1 billion members is computationally expensive; therefore an ensemble with ~20 million  
627 members is randomly subsampled to obtain results, and repeated three times. Uncertainty converges at this scale, and repeat  
628 random samplings at the same scale lead to variation in the results of on the order of 0.01 °C.

629

630 Compared to Forster et al. (2025), the GWI calculation remains largely the same, differing only by (i) using ERFs and observed  
631 temperatures updated to 2025, (ii) averaging results across five random ~10 million member sub-samplings instead of three  
632 ~20 million member sub-samplings (due to a reduced availability of very high memory compute nodes), and (iii) constraining  
633 the total forced warming to be zero for 1850-1900 in regression, where previously (only) total forced was granted an extra  
634 degree of freedom (this could lead to a very small non-zero offset in the 1800s of < 0.02°C in total forced warming, the  
635 influence of which decreased towards the current year; changing this has a negligible effect on current total forced warming,  
636 but avoids potential complications of interpretation if the Tot timeseries is re-baselined during external applications).  
637 Collectively these changes have led to a downward revision of GWI human-induced warming for the year 2024 (between this  
638 2025 assessment and last year's 2024 assessment) of ~0.005°C, which is less than 1/5th of the current annual warming rate,  
639 though is smaller than the expected variation from re-sampling the Monte Carlo ensemble.

640

### **S8.2.2 Kriging for climate change**

641 The kriging for climate change method was originally introduced by Ribes et al. (2021), and subsequently extended in Qasmi  
642 and Ribes (2022), to attribute past warming and constrain temperature projections over the 21st century. This statistical method  
643 is very similar to ensemble Kalman filtering or kriging. In the original publication (Ribes et al., 2021), a subset of 22 CMIP6  
644 models was considered. For each of them, a statistical procedure was applied to estimate the warming induced by GHG, ANT  
645 (temporal smoothing procedure) or NAT (using an Energy Balance Model) forcings, respectively. This subset of models was  
646 subsequently used to form an a priori distribution (in a Bayesian sense) of past attributable warming. Then the posterior  
647 distribution of past attributable warming given observations was derived. This application was based on HadCRUT4-CW  
648 GMST observations (Cowtan and Way, 2014), inflated by 6% to account for the assessment at that time of stronger warming  
649 of GSAT relative to GMST.

650

651 Results from this calculation were quoted in Eyring et al. (2021). The update made here uses the same subset of 22 CMIP6  
652 models. However, HadCRUT5 observations are used, instead of previous datasets, over an extended 1850-2024 period.

653 Consistent with the AR6 assessment about GMST to GSAT warming ratio, no scaling correction is applied; i.e. the global  
654 mean value from HadCRUT5 is assumed to be representative of GSAT changes (see Sect. S8.1). As it relies on available  
655 CMIP6 simulations, this update assumes that the world has followed a SSP2-4.5 pathway since 2015. Emissions in the SSP  
656 scenarios are similar in the period up until 2024 and close to those which have occurred (e.g. Chen et al., 2021); therefore this  
657 is a reasonable approximation. Future updates with this method will incorporate new observations. In parallel, we will try to  
658 replace the CMIP6 models by emulators, thus allowing the latest available estimates of radiative forcings to be considered,  
659 instead of the SSP2-4.5 scenario.

### 660 **S8.2.3 Regularized optimal fingerprinting**

661 Optimal fingerprinting is the name given to optimal regression-based approaches to attribution, in which observed anomalies  
662 are regressed onto the simulated response to individual forcings from climate models, with the regression coefficients used to  
663 infer attributable contributions to observed changes (e.g. Allen and Stott, 2003; Eyring et al., 2021). Ribes et al. (2013)  
664 proposed an improved version of the standard total least squares regression, known as regularised optimal fingerprinting, which  
665 exhibited improved accuracy in perfect model tests. Gillett et al. (2021) applied this approach to regress observed 5-year mean  
666 observed GMST onto the simulated response to individual forcings from the DAMIP simulations (Gillett et al., 2016) of 13  
667 CMIP6 models. In order to ensure a like-for-like comparison, Gillett et al. (2021) regressed observations of GMST, derived  
668 from gridded non-infilled near-surface air temperature over land and sea ice, and sea surface temperature over oceans, onto  
669 GMST derived from CMIP6 model output in the same way (Cowtan et al., 2015). However, since globally complete GSAT is  
670 usually used in the climate impact literature which served as a basis for global warming goals, Gillett et al. (2021) used  
671 regression coefficients to infer attributable warming in globally complete GSAT.

672  
673 Gillett et al. (2021) used CMIP6 DAMIP simulations which generally finished in 2020 and therefore cannot directly be used  
674 to infer attributable warming in subsequent years. However, some modelling centres ran single-forcing DAMIP simulations  
675 into the future under the SSP2-4.5 scenario (Gillett et al., 2016). Data from concatenated historical and ssp245, hist-nat and  
676 ssp245-nat, and hist-GHG and ssp245-GHG were taken from CanESM5 (50, 10, 10), IPSL-CM6A-LR (11, 10, 6) and  
677 MIROC6 (3, 50, 50), where numbers in brackets indicate the respective ensemble sizes. Our approach assumes that observed  
678 drivers have evolved as in the SSP2-4.5 scenario over the period since 2015, which is a reasonable assumption to the present  
679 (e.g. Chen et al., 2021). As in Gillett et al. (2021), internal variability was estimated from intra-ensemble anomalies. Whereas  
680 the Gillett et al. (2021) results assessed by Eyring et al. (2021) were based on HadCRUT4, this dataset is no longer being

681 updated, and therefore we use the non-infilled version of HadCRUT5 here (Morice et al., 2021). As shown by Gillett et al.  
682 (2021), using HadCRUT5 in place of HadCRUT4 results in a 7% increase in the best estimate of anthropogenic warming for  
683 2010-2019, as a result of the difference in warming between the two observation datasets . Gillett et al. (2021) regressed 34 5-  
684 year means of GMST over the period 1850-2019 onto simulated GMST over the same period. Here we extend the analysis  
685 using 35 5-year means, with the latter based on observations from January 2020 to December 2024 and the model output  
686 masked in the same way. In order to be consistent with the Global Warming Index and kriging for climate change approaches  
687 described above, and for comparison with GMST observations, we primarily report attributable warming in globally complete  
688 GMST here, rather than GSAT (see Sect. S8.1). Calculated anthropogenic warming in GSAT in 2010-2019 computed using  
689 HadCRUT5 with this approach of 1.16 (1.04-1.29) °C can be compared with the same quantity reported in Gillett et al. (2021)  
690 (their Supplementary Table 1) of 1.18 (1.09-1.27) °C, indicating good consistency.

691  
692 The method described above is easily updatable into the future using the same set of simulations, simply by updating  
693 observations to a later date and masking model output accordingly. As in the KCC method, a caveat to this approach is that it  
694 relies on SSP2-4.5 simulations from which actual anthropogenic forcing might be expected to gradually diverge and from  
695 which actual natural forcing could rapidly diverge, for example, were a major volcanic eruption to occur.

696  
697 **Table S5 Estimates of global mean surface air temperature (GSAT) warming attributable to multiple influences (in °C) relative to**  
698 **the 1850–1900 baseline period. Values are given as the median, with the 5-95 percentile range in brackets, provided to 0.01°C**  
699 **precision. GSAT results here are only provided for regularised optimal fingerprinting (ROF) because the GSAT results for the other**  
700 **attribution methods (the Global Warming Index (GWI) and kriging for climate change (KCC)) are identical to the GMST results**  
701 **for those methods.**

| <b>variable</b>                        | <b>2010-2019<br/>(decade average)</b> | <b>2016-2025<br/>(decade average)</b> | <b>2017<br/>(trend-based)</b> | <b>2025<br/>(trend-based)</b> |
|----------------------------------------|---------------------------------------|---------------------------------------|-------------------------------|-------------------------------|
| <i>Human-induced</i>                   | 1.15 (1.02 to 1.28)                   | 1.36 (1.20 to 1.52)                   | 1.19 (1.06 to 1.33)           | 1.51 (1.33 to 1.70)           |
| <i>Well-mixed<br/>greenhouse gases</i> | 1.43 (1.23 to 1.64)                   | 1.59 (1.36 to 1.82)                   | 1.48 (1.26 to 1.70)           | 1.71 (1.46 to 1.96)           |

|                             |                        |                        |                        |                        |
|-----------------------------|------------------------|------------------------|------------------------|------------------------|
| <i>Other human forcings</i> | -0.25 (-0.45 to -0.06) | -0.23 (-0.41 to -0.05) | -0.26 (-0.47 to -0.06) | -0.21 (-0.39 to -0.04) |
| <i>Natural</i>              | 0.02 (-0.02 to 0.05)   | 0.01 (-0.03 to 0.05)   | 0.02 (-0.02 to 0.05)   | 0.00 (-0.04 to 0.05)   |

702

703 **S8.3 Results from each Attribution Method**

704 Results for each attribution method, including headline results and timeseries, are available in csv form in the Climate Indicator  
705 repository: <https://github.com/ClimateIndicator/anthropogenic-warming-assessment/>.

706

707 **Table S6 Estimates of global mean surface temperature (GMST) warming attributable to multiple influences (in °C) relative to the**  
708 **1850–1900 baseline period, provided for each warming attribution method and the overall multi-method assessment. Values for**  
709 **individual attribution methods are given as the median, with the 5-95 percentile range in brackets, provided to 0.01 °C precision.**  
710 **Values for the assessment are calculated as defined in Sect. S8.4 and given as best estimates with likely ranges in brackets.**

| Variable                           | Method            | 2010-2019<br>(decade<br>average) | 2016-2025<br>(decade<br>average) | 2017<br>(single<br>year<br>annual<br>mean ) | 2025<br>(single<br>year<br>annual<br>mean ) | 2017<br>(single<br>year trend-<br>based) | 2025<br>(single<br>year trend-<br>based) |
|------------------------------------|-------------------|----------------------------------|----------------------------------|---------------------------------------------|---------------------------------------------|------------------------------------------|------------------------------------------|
| <i>Human-induced</i>               | <i>GWI</i>        | 1.05 (0.97 to 1.13)              | 1.21 (1.11 to 1.31)              | 1.12 (1.03 to 1.21)                         | 1.33 (1.20 to 1.45)                         | 1.10 (1.01 to 1.19)                      | 1.33 (1.21 to 1.45)                      |
|                                    | <i>KCC</i>        | 1.06 (0.92 to 1.18)              | 1.22 (1.07 to 1.35)              | 1.12 (0.98 to 1.25)                         | 1.34 (1.18 to 1.49)                         | 1.12 (0.98 to 1.24)                      | 1.33 (1.17 to 1.49)                      |
|                                    | <i>ROF</i>        | 1.10 (0.97 to 1.22)              | 1.29 (1.14 to 1.44)              | 1.16 (1.01 to 1.32)                         | 1.47 (1.25 to 1.70)                         | 1.13 (1.00 to 1.26)                      | 1.44 (1.26 to 1.62)                      |
|                                    | <i>Assessment</i> | 1.07 (0.9 to 1.3)                | 1.24 (1.0 to 1.5)                | 1.14 (0.9 to 1.4)                           | 1.38 (1.1 to 1.7)                           | 1.12 (0.9 to 1.3)                        | 1.37 (1.1 to 1.7)                        |
| <i>Well-mixed greenhouse gases</i> | <i>GWI</i>        | 1.30 (1.01 to 1.57)              | 1.43 (1.11 to 1.72)              | 1.35 (1.05 to 1.63)                         | 1.52 (1.19 to 1.83)                         | 1.35 (1.05 to 1.62)                      | 1.52 (1.18 to 1.83)                      |
|                                    | <i>KCC</i>        | 1.48 (1.16 to 1.79)              | 1.62 (1.26 to 1.96)              | 1.54 (1.20 to 1.86)                         | 1.73 (1.34 to 2.09)                         | 1.54 (1.20 to 1.86)                      | 1.73 (1.34 to 2.09)                      |
|                                    | <i>ROF</i>        | 1.37 (1.18 to 1.57)              | 1.52 (1.30 to 1.74)              | 1.43 (1.22 to 1.65)                         | 1.64 (1.40 to 1.89)                         | 1.42 (1.21 to 1.63)                      | 1.64 (1.40 to 1.88)                      |

|                             |                   |                        |                        |                        |                        |                        |                        |
|-----------------------------|-------------------|------------------------|------------------------|------------------------|------------------------|------------------------|------------------------|
|                             | <i>Assessment</i> | 1.39 (1.0 to 1.8)      | 1.52 (1.1 to 2.0)      | 1.44 (1.0 to 1.9)      | 1.63 (1.1 to 2.1)      | 1.44 (1.0 to 1.9)      | 1.63 (1.1 to 2.1)      |
| <i>Other human forcings</i> | <i>GWI</i>        | -0.25 (-0.50 to 0.02)  | -0.21 (-0.48 to 0.07)  | -0.23 (-0.48 to 0.04)  | -0.19 (-0.48 to 0.11)  | -0.24 (-0.50 to 0.03)  | -0.18 (-0.47 to 0.11)  |
|                             | <i>KCC</i>        | -0.42 (-0.71 to -0.14) | -0.41 (-0.71 to -0.10) | -0.42 (-0.71 to -0.12) | -0.39 (-0.70 to -0.07) | -0.42 (-0.72 to -0.13) | -0.39 (-0.71 to -0.07) |
|                             | <i>ROF</i>        | -0.25 (-0.44 to -0.06) | -0.23 (-0.40 to -0.05) | -0.25 (-0.45 to -0.05) | -0.19 (-0.38 to -0.01) | -0.26 (-0.46 to -0.06) | -0.21 (-0.38 to -0.04) |
|                             | <i>Assessment</i> | -0.31 (-0.8 to 0.1)    | -0.28 (-0.8 to 0.1)    | -0.30 (-0.8 to 0.1)    | -0.26 (-0.8 to 0.2)    | -0.31 (-0.8 to 0.1)    | -0.26 (-0.8 to 0.2)    |
| <i>Natural</i>              | <i>GWI</i>        | 0.07 (0.01 to 0.12)    | 0.06 (0.01 to 0.12)    | 0.07 (0.01 to 0.13)    | 0.08 (0.02 to 0.14)    | 0.07 (0.01 to 0.13)    | 0.06 (0.01 to 0.13)    |
|                             | <i>KCC</i>        | 0.06 (0.04 to 0.08)    | 0.05 (0.03 to 0.07)    | 0.06 (0.04 to 0.08)    | 0.04 (0.03 to 0.06)    | 0.06 (0.04 to 0.08)    | 0.04 (0.03 to 0.05)    |
|                             | <i>ROF</i>        | 0.02 (-0.02 to 0.05)   | 0.01 (-0.03 to 0.05)   | 0.01 (-0.03 to 0.05)   | 0.01 (-0.04 to 0.05)   | 0.02 (-0.02 to 0.05)   | 0.00 (-0.04 to 0.05)   |
|                             | <i>Assessment</i> | 0.05 (-0.1 to 0.2)     | 0.04 (-0.1 to 0.2)     | 0.05 (-0.1 to 0.2)     | 0.04 (-0.1 to 0.2)     | 0.05 (-0.1 to 0.2)     | 0.04 (-0.1 to 0.2)     |

711

712

713

Validation of updated lines of evidence for assessing contributions to observed warming

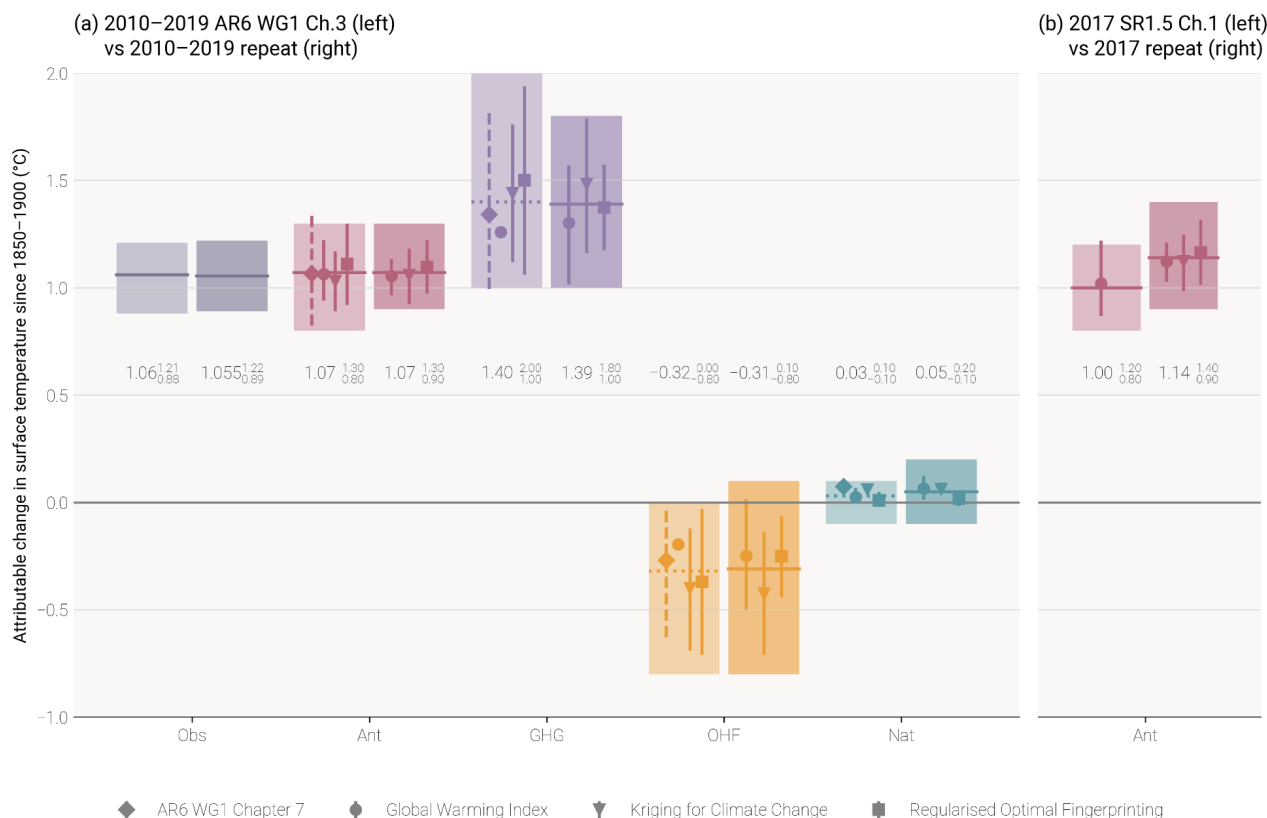

714

715 **Figure S8 Assessed contributions to observed warming and supporting lines of evidence; see AR6 WG1 Fig. 3.8. The shaded bands**  
 716 **show the assessed *likely* ranges of temperature change, relative to the 1850-1900 baseline, attributable to total anthropogenic**  
 717 **influence (Ant), well-mixed greenhouse gases (GHGs), other human forcings (OHFs), and natural forcings (Nat). The left of each**  
 718 **pair of bands depicts the results quoted from AR6, and the right of each pair of bands depicts a repeat calculation for the same**  
 719 **period as the IPCC assessment, using the revised datasets and methods, to validate the updated assessment of attributable warming.**  
 720 **Panel (a) presents decade-average warming as used in AR6, with results quoted from AR6 WGI Chapter 3 on the left and the repeat**  
 721 **assessment on the right. The solid horizontal bar in each band shows the best estimate for each warming component; if no best**  
 722 **estimate was provided, it was retrospectively calculated using the AR6 method and depicted using a horizontal dotted line to facilitate**  
 723 **comparison. In AR6, Global Warming Index results were reported as GMST, kriging for climate change results were calculated as**  
 724 **GMST and scaled by 1.06 for reporting as GSAT, and regularised optimal fingerprinting was reported as GSAT; for the repeat, all**  
 725 **methods are reported in terms of GMST (see Sect. S8.1 for discussion). Panel (b) presents single-year warming as used in SR1.5,**  
 726 **with results quoted from SR1.5 Chapter 1 on the left (which was based only on the Global Warming Index) and the repeat**  
 727 **assessment on the right, which now includes all of the attribution methods and the multi-method assessment approach used in AR6, as discussed**  
 728 **in Sect. S8.4. Both bars are reported in GMST. No assessment was provided for components other than Ant in SR1.5.**

Timeseries for each attribution method used in the assessment of contributions to observed warming

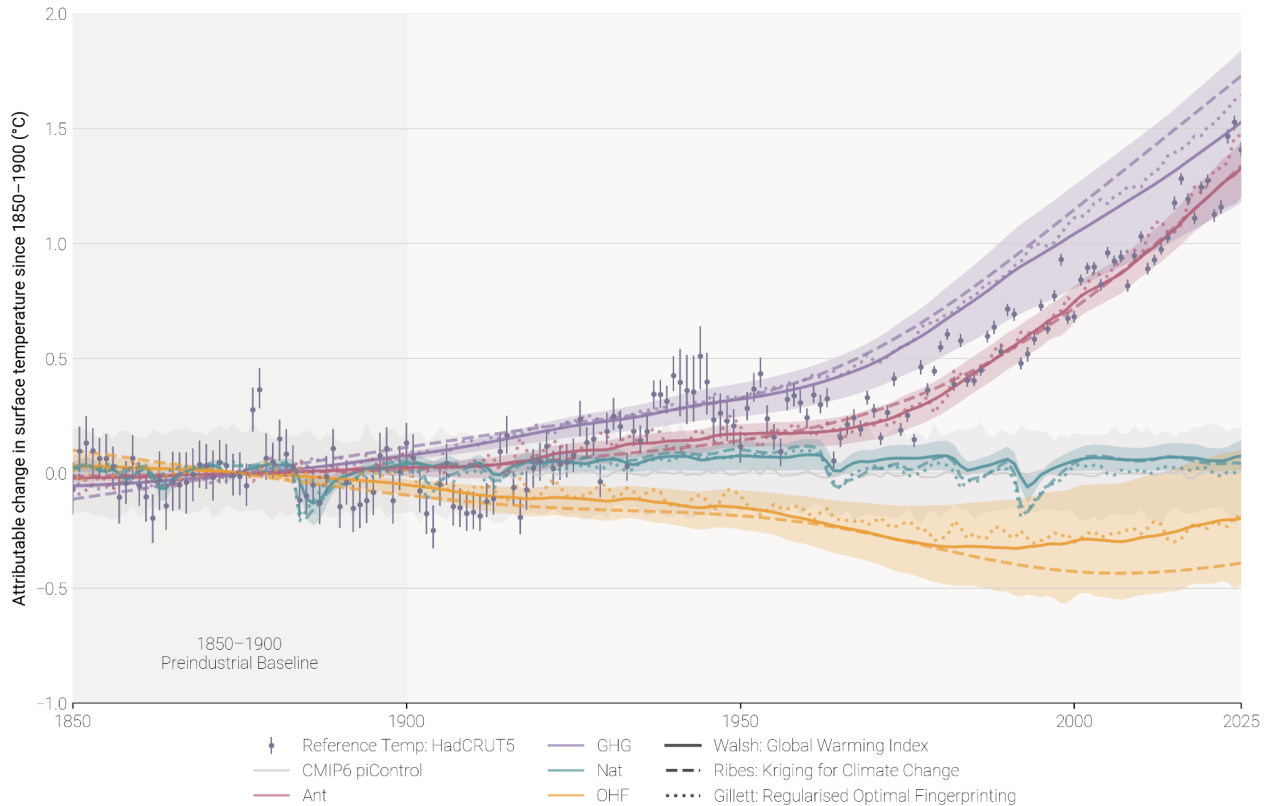

730

731 **Figure S9 Time series for each attribution method used in the updated assessment of warming contributions, expressed in terms of**  
 732 **global mean surface temperature (GMST). Coloured plumes correspond to warming contributions broken down by natural forcings**  
 733 **(Nat), well-mixed greenhouse gases (GHGs) and other human forcings (OHFs). Total human-induced warming (Ant) is therefore**  
 734 **the sum of contributions from GHG and OHF. The plume range is given by the 5-95% range of the Global Warming Index (GWI),**  
 735 **with the GWI best estimate given by the solid lines. The dashed line presents the best estimate from the kriging for climate change**  
 736 **(KCC) method, and the dotted line presents the best estimate from the regularised optimal fingerprinting (ROF) method. GWI and**  
 737 **KCC are given as annual values based on infilled GMST from HadCRUT5; ROF is given as annual values of globally complete**  
 738 **GMST. The CMIP6 pre-industrial control (piControl) simulations are used as a proxy for multiple samplings of internal variability**  
 739 **and are used to account for attribution uncertainty resulting from internal variability in the GWI method (see Sect. S8.2.1).**

740

Timeseries for each attribution method used in the assessment of contributions to observed warming

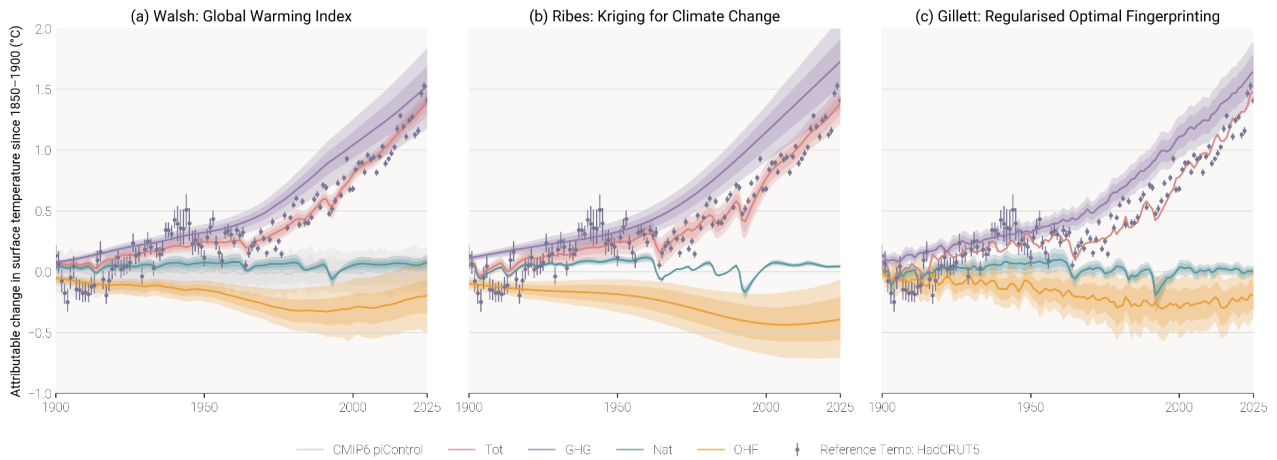

741

742

743

744

745

746

747

748

749

750

751

**Figure S10** Time series for each attribution method used in the updated assessment of warming contributions, expressed in terms of global mean surface temperature (GMST). Coloured plumes are given for both 17-83% and 5-95% ranges and correspond to warming contributions to observed warming broken down by natural forcings (Nat), well-mixed greenhouse gases (GHGs) and other human forcings (OHFs). Total warming (Tot) is the total attributable warming and therefore the sum of contributions from GHG, OHF and Nat. Observation data from (infilled) HadCRUT5 are presented with 9-95% uncertainty bars. Panel (a) presents results from the Global Warming Index method (Sect. S8.2.1); the CMIP6 pre-industrial control (piControl) simulations are used as a proxy for multiple samplings of internal variability and used to account for uncertainty in the attribution resulting from internal variability (see Sect. S8.2.1). Panel (b) presents results from the kriging for climate change methods (Sect. S8.2.2). Panel (c) presents results from regularised optimal fingerprinting (Sect. S8.2.3), with the time series for Tot being approximated by the sum of the Ant and Nat medians; note that this is different from GWI and KCC, where Tot is a directly attributed quantity.

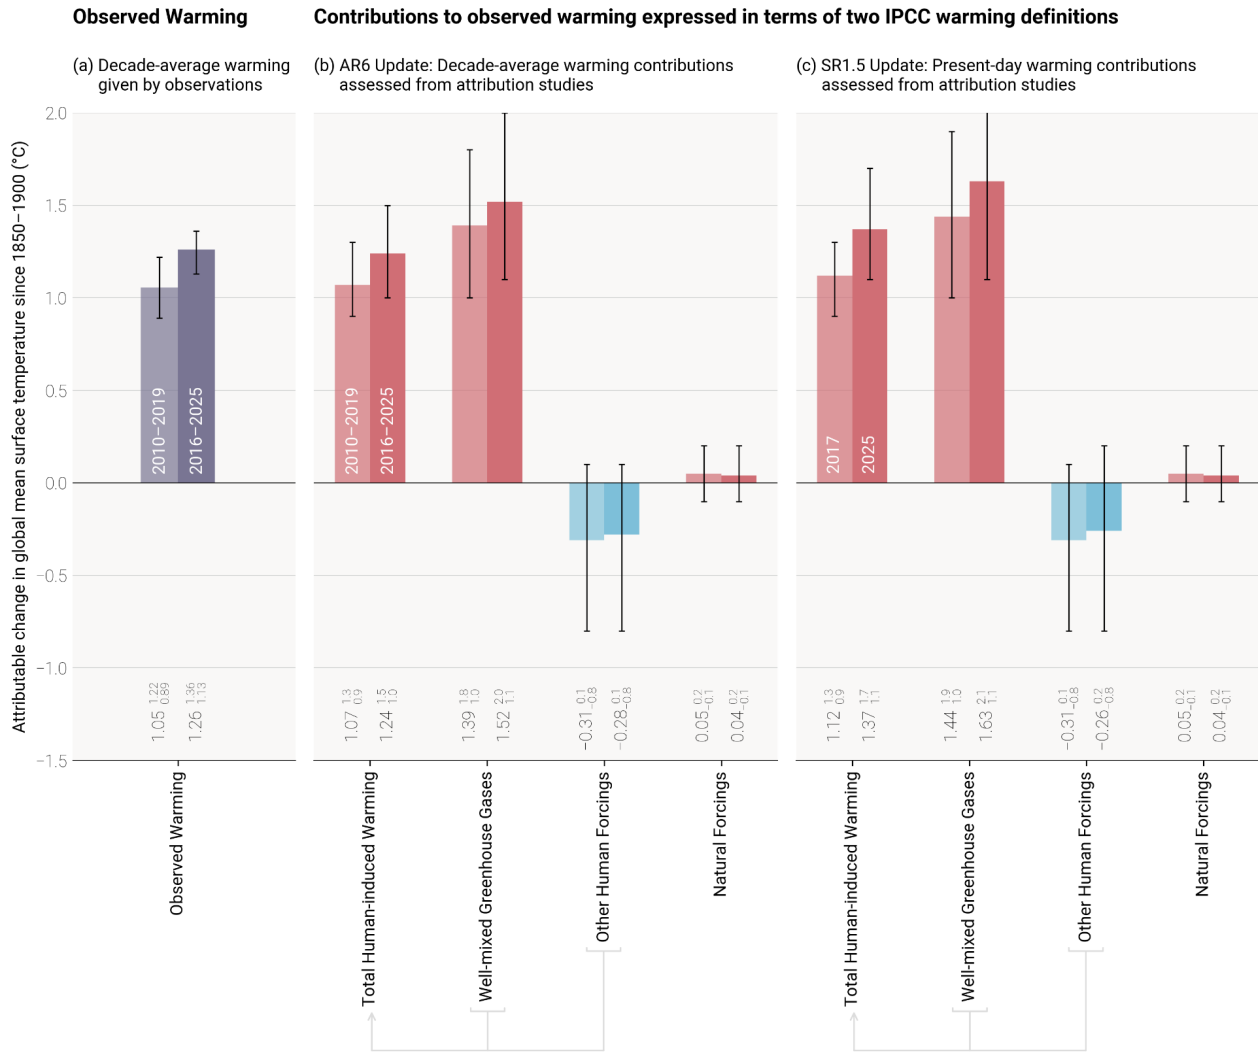

752

753  
754  
755  
756  
757  
758  
759

**Figure S11 A** repeat of Fig. 9 depicting changes to the assessed levels of warming since the sixth assessment cycle. Updated assessed contributions to observed warming relative to 1850–1900; see AR6 WGI SPM.2. Results for all time periods in this figure are calculated using updated datasets and methods. To show how these updates have affected the previous assessments, the 2010–2019 average assessed results repeat the AR6 2010–2019 assessment, and the 2017 assessed results repeat the SR1.5 2017 assessment. The 2016–2025 average and 2025 results are this year’s updated assessments for AR6 and SR1.5, respectively. For each double bar, the lighter and darker shading refers to the earlier and later period, respectively. Panel (a) shows updated observed global warming from Sect. 7, expressed as total global mean surface temperature (GMST), due to both anthropogenic and natural influences.

760 Whiskers give the “*very likely*” range. Panels (b) and (c) show updated assessed contributions to warming, expressed as global mean  
761 surface temperature (GMST), from natural forcings and total human-induced forcings, which in turn consist of contributions from  
762 well-mixed greenhouse gases and other human forcings . Whiskers give the “*likely*” range.

763

## 764 **S8.4 Updated IPCC assessment approach of attributed global warming**

### 765 **S8.4.1 Updated estimate using the AR6 WGI methodology**

766 Factoring in results from each of the three attribution methods (see Sect. S8.2), AR6 WGI Chap. 3 (Eyring et al., 2021) defined  
767 the *likely* range for each warming component as the smallest 0.1 °C precision range that enveloped the 5th to 95th percentile  
768 ranges of each method. In addition, a best estimate was provided for the human-induced (Ant) warming component, calculated  
769 as the mean of the 50th percentile values for each method. Best estimates were not provided in AR6 for the other components  
770 (well-mixed greenhouse gases (GHGs), other human forcings (OHFs) and natural forcings (Nat)), with their values in AR6  
771 WGI Fig. SPM.2(b) simply being given as the midpoint between the lower and upper bound of the *likely* range and therefore  
772 not directly comparable with the central values given for human-induced and observed warming. In order to make a meaningful  
773 and consistent comparison, and provide insight into interannual changes, an improvement is made in this update: the multi-  
774 method-mean best-estimate approach is extended for all warming components.

775

776 Note that in IPCC assessments, *likely* statements typically correspond to 66–100% probability, whereas *very likely* statements  
777 correspond to 90–100% probability. Despite deriving the overall multi-method uncertainty ranges from the 5–95<sup>th</sup> percentile  
778 ranges for each method, the overall uncertainty was conservatively assessed in AR6 to be *likely* rather than *very likely*, which  
779 noted that the methods may “underestimate the importance of the structural limitations of climate models, which probably do  
780 not represent all possible sources of internal variability; use too simple climate models, which may underestimate the role of  
781 internal variability; or underestimate model uncertainty, especially when using model ensembles of limited size and inter-  
782 dependent models, for example through common errors in forcings across models” (Eyring et al., 2021). We maintain this  
783 choice of *likely* in these updates. The *likely* confidence of the AR6 assessment is also consistent with the *likely* confidence  
784 given in SR1.5 assessment - see Supplement Sect. S8.4.2.

785 **S8.4.2 Updated estimate using the SR1.5 methodology applied to the AR6 WGI datasets**

786 While a variety of literature was drawn upon for the assessment of human-induced warming in SR1.5 Chap. 1 (Allen et al.,  
787 2018), only one method, the Global Warming Index (GWI), was used to provide a quantitative assessment of the 2017,  
788 “current”, level of human-induced warming. The latest results for this method were provided by Hausteine et al. (2017), who  
789 gave a central estimate for human-induced warming in 2017 of 1.01 °C with a 5%–95% range of (0.87 to 1.22 °C). SR1.5  
790 then accounted for methodological uncertainty by rounding this value to 0.1 °C precision for its final assessment of 1.0 °C and  
791 assessing the 0.8 to 1.2 °C range as a *likely* range. No assessment of the contributions from other components was provided  
792 due to limitations in the GWI approach at the time.

793

794 While it is possible to continue the SR1.5 assessment approach of using a single method (GWI) rounded to 0.1 °C precision,  
795 for the purpose of providing annual updates this is insufficient; (i) 0.1 °C precision is too coarse to capture meaningful inter-  
796 annual changes to the level of current warming, (ii) using different selections of methods prevents meaningful comparison  
797 between the results for decadal mean and current single-year warming calculations, and (iii) using the mean of multiple  
798 methods increases the robustness of the results. These points are simultaneously addressed in this update by adopting the latest  
799 multi-method assessment approach, as established in WGI AR6, for both the AR6 decadal mean warming update and the  
800 SR1.5 current single-year warming update. Further, where SR1.5 only provided an assessment for human-induced warming,  
801 updates in available attribution methods since SR1.5 mean that it is now also possible to provide a fully consistent assessment  
802 for all warming components. This update reports values in Table 6b of the main paper for the current single-year attributable  
803 warming calculated using the full SR1.5 trend-based definition (as discussed in Sect. 8.1), with a comparison to results for the  
804 current single-year attributable warming calculated using the simple annual mean definition provided in Table S6.

805

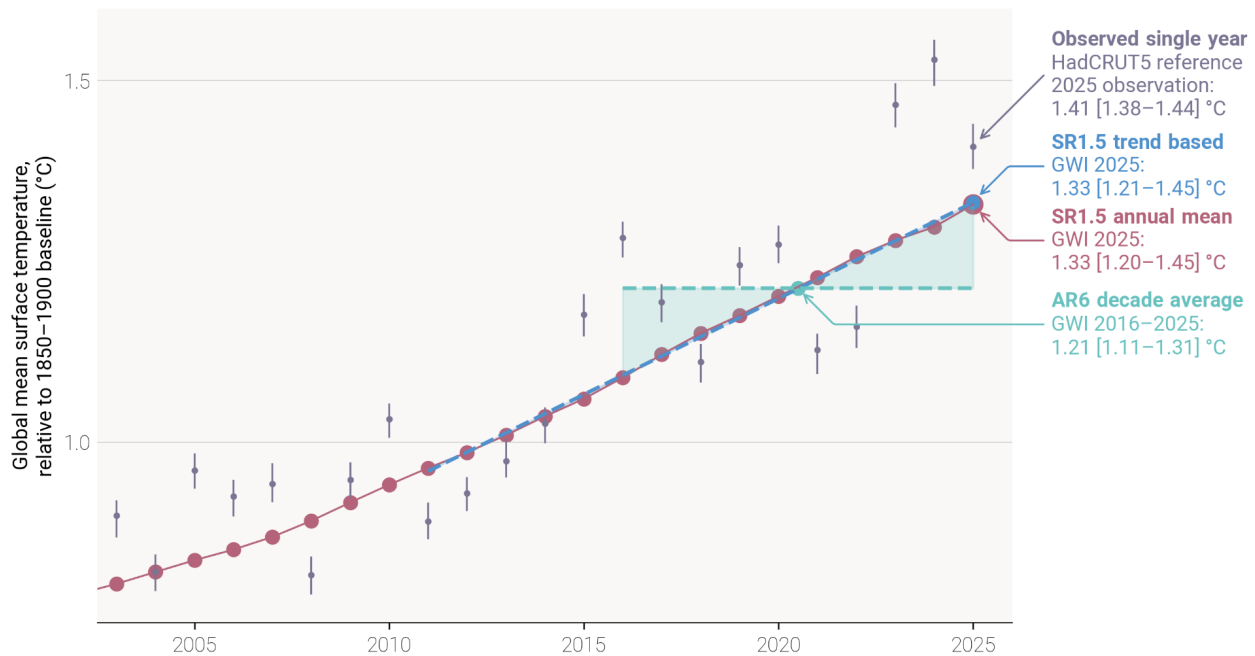

806

807 **Figure S12 Anthropogenic warming period definitions adopted in the IPCC sixth assessment cycle.** A single sampled time series of  
 808 anthropogenic warming is shown in red (in this case from the GWI method – see Sect. S8.2.1). Annual-mean warming is given by  
 809 the annual values of the GWI time series. The AR6 decade-average warming is given by the average of the 10 most recent annual-  
 810 mean anthropogenic warming values; this is depicted by the dashed green line with shading between this and the red annual-mean  
 811 values. The decade-average value for 2016–2025 is given by the green dot. SR1.5 trend-based warming is given by the end point of  
 812 the linear trend line through the 15 most recent annual-mean anthropogenic warming values; this is depicted by the dashed blue  
 813 line with shading between this and the red annual-mean values; the trend-based value for 2025 is given by the blue dot. Reference  
 814 observations of GMST are provided from HadCRUT5, with 5%–95% uncertainty range. In practice, the annual-mean, trend-  
 815 based, and decade-average calculations are applied at the level of the individual ensemble members for each of the three attribution  
 816 methods; percentiles of those ensemble results provide central estimates and uncertainty ranges for each method, and the multi-  
 817 method assessment combines those into the final assessment results with uncertainty (as described in Sect. S8.4). For reference, the  
 818 GWI results for 2025 (provided in Sect. 8.3) are annotated in the figure.

819 **S8.5 Rate of human-induced warming**

820 **S8.5.1 SR1.5 and AR6 definitions of warming rate**

821 Following the approach from previous years' assessments, we use recent IPCC definitions of anthropogenic warming rate. In  
822 SR1.5 a number of separate studies were considered, with each study defining the rate of warming in a separate way. SR1.5  
823 concluded that the rate of anthropogenic warming in 2017 was 0.2 °C per decade (likely range spanning 0.1 °C to 0.3 °C per  
824 decade). AR6 WGI utilised three methods (GWI, KCC, ROF; see definitions in Section S8.2), with the rate defined as the  
825 linear trend over the preceding decade of attributed warming. While AR6's best-estimate trends were all higher than in SR1.5's  
826 assessment, Eyring et al. (2021) concluded that there was insufficient evidence to change the assessed anthropogenic warming  
827 trend, which remained at 0.2 °C per decade (likely range spanning 0.1 °C to 0.3 °C per decade).

828 **S8.5.2 Methods**

829 Here, we use AR6's definition for rate of warming, calculated using ordinary least-squares linear regression. As noted in  
830 previous assessments, this means the rate of warming in a given year is the trend centred on the preceding decade (i.e. it lags  
831 5 years behind present day). We calculate the warming rate for each attribution method separately.

832  
833 Only the GWI methodology relies on the updated historical forcing timeseries presented in Sect. 5, with the other two methods  
834 (ROF and KCC) relying on CMIP6 SSP2-4.5 simulations, which are out of date, having decoupled from historical trends in  
835 2017 (see Sect. S8.2). As discussed in previous years, very recent changes in anthropogenic forcing are not captured fully in  
836 the decade-average trend estimated from these attribution methods. Further, the anthropogenic forcing record used for  
837 attributing warming contains small contributions from biomass burning in the natural environment, because of difficulty  
838 separating this in estimates of anthropogenic aerosol emissions. It is not expected that either of these effects will substantially  
839 bias the globally-averaged rate of warming estimated here.

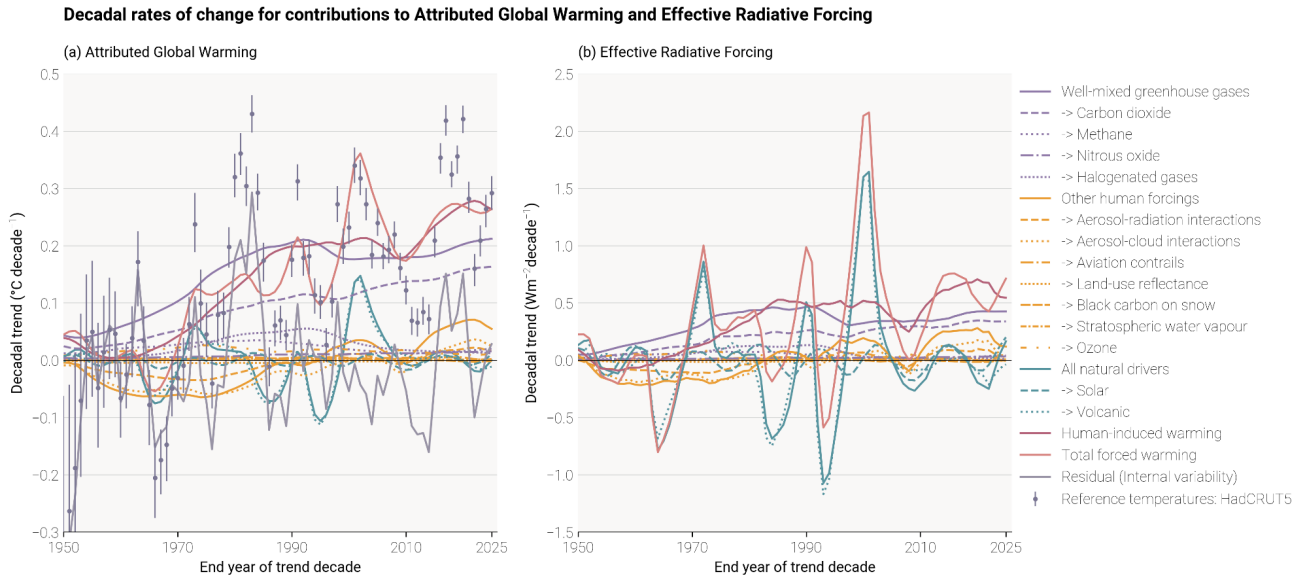

841

842 **Figure S13 Rates of (a) attributable warming (global mean surface temperature (GMST)) and (b) effective radiative forcing. The**  
 843 **attributable warming rate time-series are calculated using the Global Warming Index method with full ensemble uncertainty. The**  
 844 **observed GMST rates included for reference are also calculated with uncertainty from the HadCRUT5 ensemble. This is an**  
 845 **extension of Figure 10 in the main text, showing a component-wise breakdown of the aggregate variables, presented here without**  
 846 **uncertainty plumes for visual clarity.**

847 Individual warming rate attributions are revised upwards slightly from previous years (see Table 7 in main text and Table S7  
 848 below). For the decade 2016–2025 relative to 2015–2024, both KCC and GWI remained the same as the previous year's rate,  
 849 while ROF decreased by 0.03 °C/decade. This decrease in the ROF method's rate returns the rate estimate closer to the 2024  
 850 paper's rate estimate, with the 2025 paper's estimate having previously increased by 0.04 °C/decade. These variations  
 851 principally reflect the fact that the methodology, based on a linear regression of CMIP ensemble member's historical (plus  
 852 SSP scenario projection to present day) warming onto observed GMST anomaly, is strongly influenced by residual internal  
 853 variability that remains in the anthropogenic warming signal due to the limitations in size of the CMIP ensemble, particularly  
 854 given that the number of CMIP ensemble members which project ensemble members forward to 2025 is reduced compared to  
 855 those running the full historical experiment.

856

857 The full uncertainty ranges of the three methodologies are also revised in table S7, reflecting new information on the warming  
 858 rate implied by the 2025 observed GMST anomaly, the update of HadCRUT from 5.0.2 to 5.1.0, and additional information  
 859 on the recent radiative forcing rate in the case of GWI. KCC’s 5th-percentile warming rate is decreased to 0.22°C/decade, and  
 860 ROF’s 95th-percentile warming rate is decreased to 0.54°C/decade. The GWI method – which incorporates updated historical  
 861 forcing estimates described in section S5 – have both decreased 5th-percentile warming rate (0.18°C/decade) and increased  
 862 95th-percentile warming rate (0.32°C/decade). Following the approach in SR1.5 and AR6, and previous assessments here, the  
 863 assessed warming rate is estimated excluding the ROF methodology, deemed an outlier strongly influenced by internal  
 864 variability in historical GMST and SSP2-45 GSAT anomalies calculated from CMIP6 model outputs. Although the GWI  
 865 method has a 5th-percentile warming rate which is below 0.2°C/decade, we choose here to maintain the overall assessed  
 866 warming rate range at the previously-assessed 0.2–0.4°C/decade.

867

868 **Table S7 Estimates of the rate of anthropogenic warming (in °C per decade), provided for each warming attribution method and**  
 869 **the overall multi-method assessment. Values for individual attribution methods are calculated as defined in Sect. S8.5 (least**  
 870 **squares fit through most recent 10-year period), with best estimates provided as the median, with the 5-95 percentile range in**  
 871 **brackets, provided to 0.01 °C precision.**

| Variable                             | Method            | 2010-2019 AR6 Quote | 2010-2019 Repeat         | 2016-2025                |
|--------------------------------------|-------------------|---------------------|--------------------------|--------------------------|
| <i>Rate of human-induced warming</i> | <i>GWI</i>        | 0.23 [0.19 to 0.35] | 0.27 [0.22 to 0.32] GMST | 0.26 [0.18 to 0.32] GMST |
|                                      | <i>KCC</i>        | 0.23 [0.19 to 0.29] | 0.25 [0.21 to 0.30] GMST | 0.27 [0.22 to 0.32] GMST |
|                                      | <i>ROF</i>        | 0.35 [0.30 to 0.41] | 0.27 [0.16 to 0.37] GMST | 0.39 [0.25 to 0.54] GMST |
|                                      | <i>Assessment</i> | 0.2 [0.1 to 0.3]    | 0.26 [0.2 to 0.4]        | 0.27 [0.2 to 0.4]        |

872

873

874

875

876 **S9. Remaining carbon budget**

877 The remaining carbon budget is tabulated below for all decimals between 1.5 °C and 2 °C. In Table S8 we present results  
 878 directly comparable to Table 8 of the main paper except using the total warming instead of anthropogenic warming. In Table

879 S9 we average the non-CO<sub>2</sub> impacts as estimated by MAGICC (as in other tables) and the simple climate model FaIR. We also  
 880 include an uncertainty of ±0.19 °C in the post-net zero warming (ZEC) in Table S9. This corresponds to the “default update”  
 881 in Lamboll et al. (2023), using the updated values for recent temperatures and emissions. Finally, these numbers are calculated  
 882 using the most recent, human-attributable warming S10.

883 **Table S8 remaining carbon budgets, using observed warming (2016-2025) instead of anthropogenic warming as in the**  
 884 **main case, using only MAGICC.**

| Temperature (°C)                               | Estimated remaining carbon budgets from the beginning of 2026 base year (GtCO <sub>2</sub> ) |      |      |      |     |     |     |
|------------------------------------------------|----------------------------------------------------------------------------------------------|------|------|------|-----|-----|-----|
| Avoidance probability (TCRE uncertainty only): | 10%                                                                                          | 17%  | 33%  | 50%  | 67% | 83% | 90% |
| 1.5                                            | 410                                                                                          | 280  | 160  | 100  | 50  | 10  | -10 |
| 1.6                                            | 770                                                                                          | 570  | 380  | 280  | 210 | 140 | 100 |
| 1.7                                            | 1130                                                                                         | 870  | 610  | 460  | 360 | 270 | 220 |
| 1.8                                            | 1500                                                                                         | 1160 | 830  | 650  | 520 | 400 | 340 |
| 1.9                                            | 1860                                                                                         | 1450 | 1050 | 830  | 670 | 530 | 460 |
| 2                                              | 2220                                                                                         | 1740 | 1270 | 1010 | 830 | 660 | 580 |

885

886 **Table S9 remaining carbon budgets, including uncertainty in ZEC and averaging results from MAGICC and FaIR for**  
 887 **non-CO<sub>2</sub> warming.**

| Temperature (°C)                | Estimated remaining carbon budgets from the beginning of 2026 base year (GtCO <sub>2</sub> ) |     |     |     |     |     |     |
|---------------------------------|----------------------------------------------------------------------------------------------|-----|-----|-----|-----|-----|-----|
| Avoidance probability (TCRE and | 10%                                                                                          | 17% | 33% | 50% | 67% | 83% | 90% |

|                   |      |      |      |      |     |      |      |
|-------------------|------|------|------|------|-----|------|------|
| ZEC uncertainty): |      |      |      |      |     |      |      |
| 1.5               | 1000 | 720  | 400  | 190  | 0   | -220 | -360 |
| 1.6               | 1290 | 960  | 600  | 370  | 170 | -40  | -180 |
| 1.7               | 1600 | 1220 | 810  | 550  | 340 | 120  | -10  |
| 1.8               | 1920 | 1480 | 1010 | 730  | 500 | 280  | 140  |
| 1.9               | 2250 | 1740 | 1220 | 910  | 670 | 430  | 290  |
| 2                 | 2580 | 2020 | 1430 | 1090 | 830 | 580  | 440  |

888

889

890 **Table S10 years that a linear path would take to get to net zero, assuming an immediate start and meeting the remaining**  
891 **carbon budgets in the main paper (table 8).**

| Temperature (°C)                               | Years after 2026 |     |     |     |     |     |     |
|------------------------------------------------|------------------|-----|-----|-----|-----|-----|-----|
|                                                | 10%              | 17% | 33% | 50% | 67% | 83% | 90% |
| Avoidance probability (TCRE uncertainty only): |                  |     |     |     |     |     |     |
| 1.5                                            | 22               | 16  | 10  | 6   | 4   | 2   | 0   |
| 1.6                                            | 39               | 29  | 20  | 15  | 11  | 8   | 6   |
| 1.7                                            | 56               | 43  | 30  | 23  | 18  | 14  | 11  |
| 1.8                                            | 73               | 57  | 41  | 32  | 25  | 20  | 17  |
| 1.9                                            | 90               | 70  | 51  | 40  | 33  | 26  | 23  |
| 2                                              | 107              | 84  | 61  | 49  | 40  | 32  | 28  |

892

893

894 Estimating the remaining carbon budget (RCB) requires an estimate of future non-CO<sub>2</sub> warming. The latter estimate is derived  
895 from the emissions trajectories as modelled by internally consistent emissions scenarios. While RCB estimates are for CO<sub>2</sub>  
896 emissions only, the consideration of non-CO<sub>2</sub> warming implies that assumptions are also made about reductions in other  
897 anthropogenic forcers (Rogelj and Lamboll, 2024). These reductions have to be kept in mind, as a shortfall in non-CO<sub>2</sub>  
898 greenhouse gas emissions would result in a smaller RCB estimate. For instance, as reported in Rogelj and Lamboll (2024), the  
899 estimate of RCBs consistent with limiting warming to 1.5 °C assumes a median reduction in CH<sub>4</sub> emissions between 2020 and  
900 2050 of 51% (while the interquartile range across available scenarios is 47–60%), a 22% reduction between 2020 and 2050 in  
901 N<sub>2</sub>O emissions (interquartile range: 7–35%), and a 78% reduction between 2020 and 2050 in SO<sub>2</sub> emissions (interquartile  
902 range: 74–78%). Assumed reductions consistent with other levels of warming are reproduced from Rogelj and Lamboll (2024)  
903 and provided in Table S10. The estimates reported in Table 8 of the main paper are based on the median non-CO<sub>2</sub> emission  
904 reductions. Falling short of achieving the assumed non-CO<sub>2</sub> greenhouse gas emissions reductions would further reduce the  
905 RCB. Sulphur dioxide emissions are more tightly co-controlled with CO<sub>2</sub> reduction because of the phase-out of unabated fossil  
906 fuel combustion and air pollution control measures (Rogelj et al., 2014a, 2014b). A shortfall in their reductions would therefore  
907 be less conceivable in a net-zero CO<sub>2</sub> world.

908 **Table S11 Non-CO<sub>2</sub> reductions implied in Remaining Carbon Budget (RCB) estimates, adapted from Rogelj and Lamboll (2024).**  
909 **Values represent the changes in non-CO<sub>2</sub> emissions between 2020 and 2050 consistent with the RCB estimates for 1.5°C, 1.7°C and**  
910 **2.0°C. The median changes are the default and marked in light blue. Any deviation from this median assumption results in an**  
911 **increase or decrease of the RCB estimate.**

| Temperature level for which RCB was estimated | Percentile       | Implied non-CO <sub>2</sub> change between 2020 and 2050 [%] |                  |                 |
|-----------------------------------------------|------------------|--------------------------------------------------------------|------------------|-----------------|
|                                               |                  | CH <sub>4</sub>                                              | N <sub>2</sub> O | SO <sub>2</sub> |
| 1.5°C                                         | 10 <sup>th</sup> | -69                                                          | -47              | -80             |
|                                               | 25 <sup>th</sup> | -60                                                          | -35              | -78             |
|                                               | 50 <sup>th</sup> | -51                                                          | -22              | -78             |

|       |                  |     |     |     |
|-------|------------------|-----|-----|-----|
|       | 75 <sup>th</sup> | -47 | -7  | -74 |
|       | 90 <sup>th</sup> | -39 | +2  | -66 |
| 1.7°C | 10 <sup>th</sup> | -62 | -42 | -78 |
|       | 25 <sup>th</sup> | -53 | -30 | -76 |
|       | 50 <sup>th</sup> | -44 | -18 | -73 |
|       | 75 <sup>th</sup> | -39 | -3  | -68 |
|       | 90 <sup>th</sup> | -31 | +6  | -60 |
| 2.0°C | 10 <sup>th</sup> | -51 | -35 | -75 |
|       | 25 <sup>th</sup> | -43 | -23 | -72 |
|       | 50 <sup>th</sup> | -34 | -11 | -66 |
|       | 75 <sup>th</sup> | -27 | +2  | -59 |
|       | 90 <sup>th</sup> | -20 | +12 | -51 |

912

913 **S10. Indicator of climate and weather extremes: land average maximum temperatures and number of marine heatwave**  
914 **days**

915 **S10.1 Land average annual maximum temperature (TXx) – Methods**

916 The choice of datasets for the analysis of land average TXx is based on a trade-off between record length, data availability,  
917 near real-time updates, and long-term support. As the indicator averages over all available land grid points, the spatial coverage  
918 should be high to obtain a meaningful average, which further limits the choice of datasets. The HadEX3 dataset (Dunn et al.,  
919 2020), which is used for Fig. 11.2 in Seneviratne et al. (2021), is static and does not cover years after 2018. We therefore  
920 additionally include the Berkeley Earth Surface Temperature dataset (building off Rohde et al., 2013) and the fifth-generation  
921 ECMWF atmospheric reanalysis of the global climate (ERA5; Hersbach et al., 2020). Berkeley Earth data currently enable an  
922 analysis of annual indices up to 2023, while ERA5 covers the whole of 2025 as it is updated daily with a latency of about 5 d

923 (and the final release occurs after 2–3 months). Note that Berkeley Earth plans to release an extended and updated dataset in  
924 late spring of 2026, which we plan to include in the revision of this paper.

925

926 For HadEX3, we select the years 1961–2018, to exclude years with insufficient data coverage, and require at least 90 %  
927 temporal completeness, thus applying the same criteria as for Fig. 11.2 in Seneviratne et al. (2021). Berkeley Earth provides  
928 daily maximum temperatures, and we require more than 99 % data availability for each individual year and grid point, such  
929 that years with more than 4 missing days are removed. Based on this criterion, Berkeley Earth covers at least 95 % of the  
930 global land area from 1955 onwards. ERA5, on the other hand, has full spatio-temporal coverage by design, and hence the  
931 entire currently available period of 1950–2025 is used. The annual maximum temperature is then computed for each grid point,  
932 and a global area-weighted average is calculated for all grid points with at least 90 % temporal completeness in the respective  
933 available period (1955–2023 and 1961–2018 for Berkeley Earth and HadEX3, while ERA5 is again not affected by this  
934 criterion). We thus enforce high data availability to adequately calculate global land averaged TXx across all three datasets,  
935 but their coverage is not identical, which introduces minor deviations in the estimated global land averages. The resulting TXx  
936 time series are then computed as anomalies with respect to a baseline period of 1961–1990.

937

938 To express the TXx as anomalies with respect to 1850–1900, we add an offset to all three datasets. The offset is based on the  
939 Berkeley Earth data and is derived from the linear regression of land mean TXx to the annual mean global mean air temperature  
940 over the period 1955–2020. The offset is then calculated as the slope of the linear regression times the global mean temperature  
941 difference between the reference periods 1850–1900 and 1961–1990 (see Fig. S14).

942

943

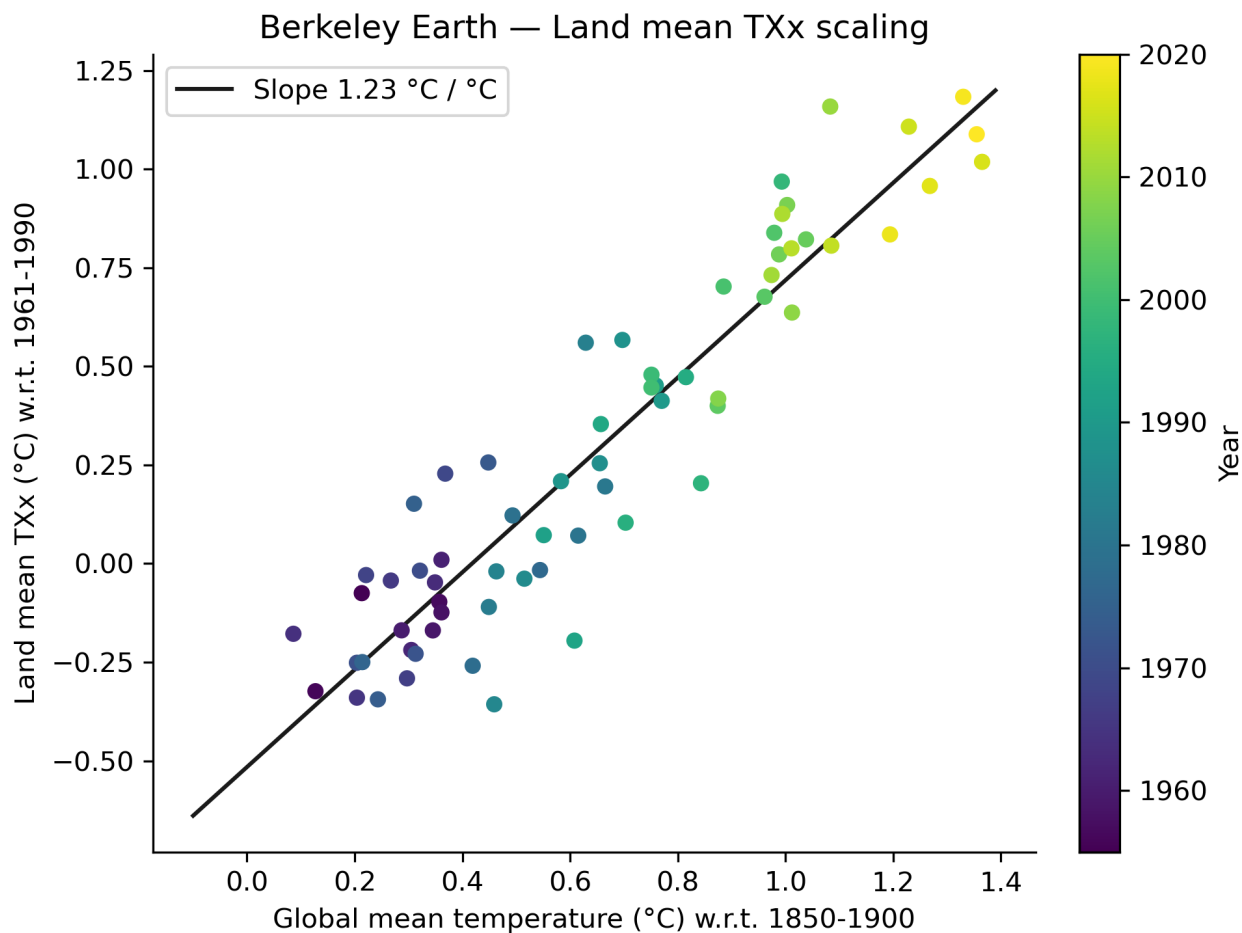

944

945

946 **Figure S14 Calculation of relationship between land mean annual maximum temperature (TXx) and global mean temperature. This**  
 947 **is used to determine the TXx offset between 1850–1900 and 1961–1990. A linear regression of TXx as a function of global mean**  
 948 **temperature from Berkeley Earth is fitted to data from 1955–2020. The TXx offset of 0.51 °C is then obtained by multiplying the**  
 949 **slope of the linear regression (1.23 °C / °C) with the global mean temperature difference between 1850–1900 and 1961–1990 (0.42°C).**

950

951 **S10.2 Number of marine heatwave days : methods**

952 Daily sea surface temperature (SST) data were used from globally available datasets extending through 2025. The datasets  
 953 used include NOAA OISST and ERA5, both provided at a spatial resolution of 0.25°, as well as higher-resolution products

954 including OSTIA and NOAA Coral Reef Watch (CRW) at 0.05°. To ensure consistency across datasets and to facilitate  
955 intercomparison, all SST products were regridded to a common 0.25° spatial resolution.

956  
957 Marine heatwave (MHW) days were identified following the methodology outlined in the IPCC SROCC and AR6 WGI (Fox-  
958 Kemper et al. 2021; Collins et al., 2019). Specifically, a MHW day was defined as a day on which SST exceeds the 99th  
959 percentile threshold within an 11-day moving window relative to a climatological baseline. The climatological reference period  
960 used here is 1985–2014, from which daily percentile thresholds were computed.

961  
962 To place MHW days in a preindustrial context, an offset correction was applied to the climatology. This adjustment follows  
963 established approaches to align modern climatological baselines with preindustrial conditions (e.g., Laufkötter et al. 2020).  
964 The offset was calculated using ERSST v6 by estimating the mean SST difference between the climatological period (1985–  
965 2014) and the preindustrial baseline (1850–1900). This difference was then subtracted from the climatological thresholds,  
966 effectively shifting them to approximate preindustrial conditions (see Fig. S15).

967  
968 This framework enables consistent detection of MHW days across datasets while accounting for long-term warming, thereby  
969 providing a robust basis for assessing changes in extreme SST events relative to both present-day and preindustrial baselines.

970  
971 **Table S12 Trend factors of the global annual number of MHW days from OISST, OSTIA, ERA5, CRW, and their mean.**

|           | OISST | OSTIA | ERA5 | CRW | Mean |
|-----------|-------|-------|------|-----|------|
| 1982-2016 | 2.4   | 2.2   | 1.7  | -   | 2.1  |
| 1983-2017 | 2.2   | 1.8   | 1.6  | -   | 1.9  |
| 1984-2018 | 2.6   | 3.1   | 2.0  | -   | 2.6  |
| 1985-2019 | 4.1   | 3.1   | 2.5  | 2.4 | 3.0  |
| 1986-2020 | 3.7   | 3.0   | 2.5  | 2.5 | 2.9  |
| 1987-2021 | 2.7   | 2.2   | 1.9  | 2.0 | 2.2  |
| 1988-2022 | 3.1   | 2.6   | 2.3  | 2.5 | 2.6  |
| 1989-2023 | 4.4   | 3.3   | 3.2  | 3.4 | 3.6  |
| 1990-2024 | 4.3   | 2.7   | 2.9  | 3.2 | 3.3  |
| 1991-2025 | 3.8   | 3.6   | 2.7  | 3.1 | 3.3  |

972

973

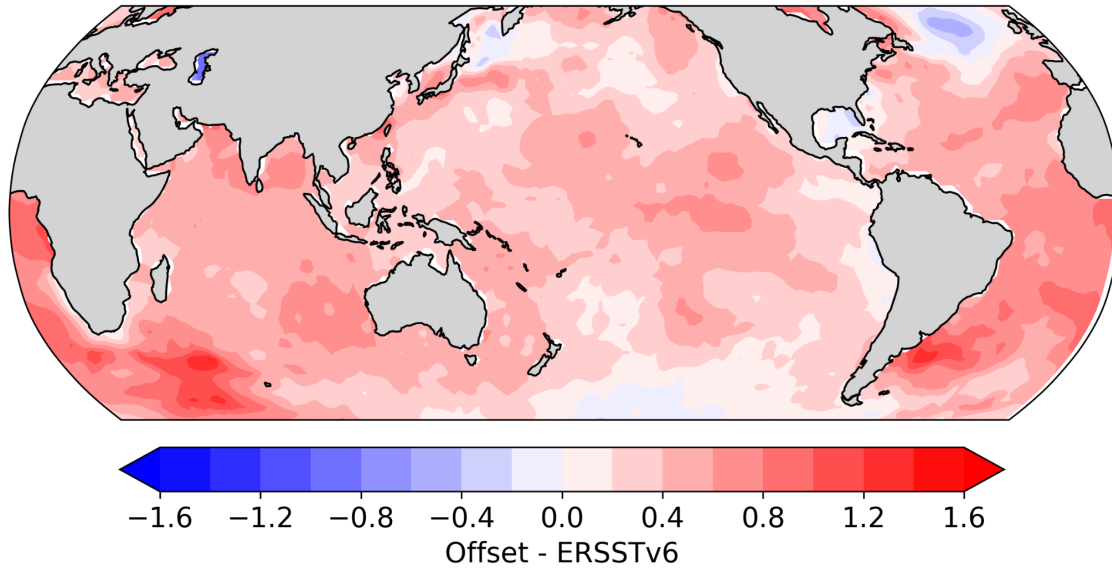

974

975

976

**Figure S15** Global map showing the offsetting used to adjust the climatology to a preindustrial baseline. The figure shows the difference between average SSTs from 1985-2014 to 1850-1900 from ERSST v6.

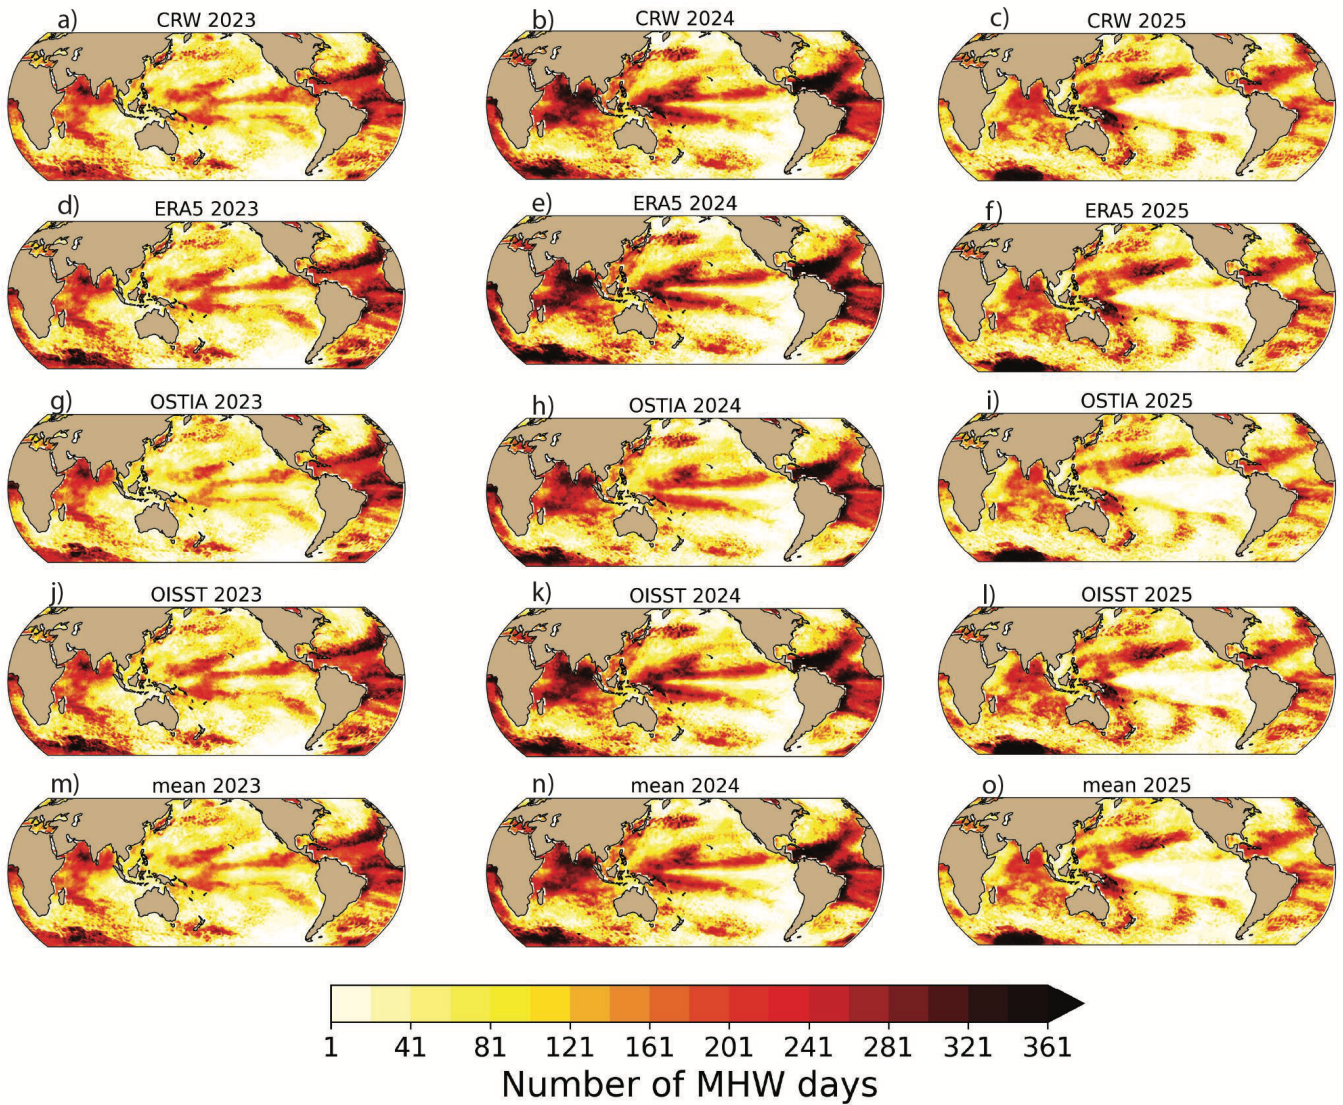

977

978 **Figure S16 Annual number of MHW days in 2023, 2024 and 2025 from the four datasets: (a-c) NOAA's CRW, (d-f) ERA5, (g-i)**  
 979 **OSTIA and (k-l) NOAA's OISST v2.1 , and (m-o) the mean of these.**

980

981 **S11. Global land precipitation**

982

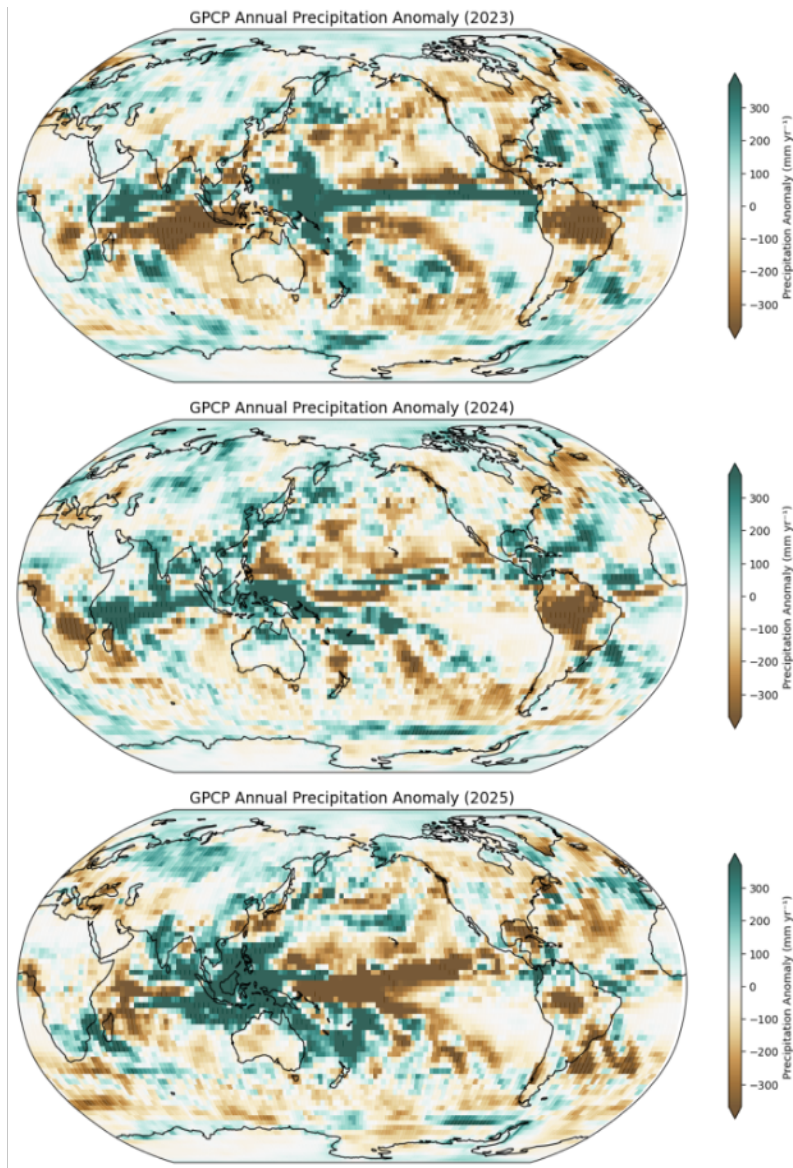

983

984 **Figure S17 Anomaly of annual precipitation in 2023, 2024, and 2025 relative to 1990-2010 climatology, obtained from GPCP V2.3.**

985 **S14. Discussion**986 **Table S13 Participants at GCOS February 2026 expert meeting on observational data risks.**

| Experts group |               |           |                  |
|---------------|---------------|-----------|------------------|
| GCOS          | Germany       | Stephan   | Bojinski         |
| GCOS          | UK            | Richard   | Cornes           |
| GCOS          | Spain         | Carmen    | García Izquierdo |
| GCOS          | United States | Steven J. | Goodman          |
| GCOS          | Japan         | Hironobu  | Iwabuchi         |
| GCOS          | UK            | Elizabeth | Kent             |
| GCOS          | South Korea   | Meehye    | Lee              |
| GCOS          | South Africa  | Charlotte | Mc Bride         |
| GCOS          | UK            | Colin     | Morice           |
| GCOS          | Germany       | Paul      | Poli             |
| GCOS          | Sweden        | Martin    | Ridal            |
| GCOS          | Germany       | Elke      | Rustemeier       |
| GCOS          | Austria       | Andreas   | Steiner          |
| GCOS          | Australia     | Blair     | Trewin           |
| GCOS          | Brazil        | Ronald    | Buss de Souza    |
| GCOS          | China         | Lijing    | Cheng            |
| GCOS          | United Stated | Meghan    | Cronin           |
| GCOS          | Spain         | Mélanie   | Juza             |
| GCOS          | Germany       | Stefan    | Kern             |
| GCOS          | United States | Tony      | Lee              |
| GCOS          | South Africa  | Tamaryn   | Morris           |
| GCOS          | Fiji          | Bipendra  | Prakash          |
| GCOS          | Italy         | Katrin    | Schroeder        |
| GCOS          | France        | Sabrina   | Speich           |
| GCOS          | France        | Karina    | Von Schuckmann   |
| GCOS          | China         | Weidong   | Yu               |
| GCOS          | UK            | Hao       | Zuo              |

|                  |                             |                     |                 |
|------------------|-----------------------------|---------------------|-----------------|
| GCOS             | United Republic of Tanzania | Nyambilila Abdallah | Amuri           |
| GCOS             | Spain                       | Emilio              | Chuvienco       |
| GCOS             | Austria                     | Wöuter              | Dorigo          |
| GCOS             | Italy                       | Claudia             | Giardino        |
| GCOS             | Italy                       | Nadine              | Gobron          |
| GCOS             | Germany                     | Andreas             | Güntner         |
| GCOS             | Italy                       | Matieu              | Henry           |
| GCOS             | Germany                     | Martin              | Herold          |
| GCOS             | New Zealand                 | Christina           | Hulbe           |
| GCOS             | China                       | Li                  | Jia             |
| GCOS             | Germany                     | Simon               | Mischel         |
| GCOS             | The Netherlands             | Claudia Andrea      | Ruz Vargas      |
| Others           | Germany                     | Ulrich              | Bundke          |
| Others           | Netherlands                 | Marta               | Gutiérrez David |
| Others           | Finland                     | Anca                | Hienola         |
| Others           | Norway                      | Cathrine            | Lund Myhre      |
| Others           | Sweden                      | Alex                | Vermeulen       |
| Others           | Netherlands                 | Tomislav            | Hengl           |
| Others           | France                      | Lionel              | Menard          |
| Others           | Poland                      | Artur               | Palacz          |
| Others           | England                     | Nicholas            | Pepin           |
| Others           | Denmark                     | Jose Miguel         | Rubio Iglesias  |
| Others           | England                     | Maria               | Shahgedanova    |
| GCOS Secretariat |                             |                     |                 |
| Director         | Switzerland                 | Albert              | Fischer         |
| Officer          | Switzerland                 | Caterina            | Tassone         |
| Officer          | Switzerland                 | Antonio             | Bombelli        |
| Officer          | Switzerland                 | Belén               | Martín Míguez   |
| Network Manager  | United Kingdom              | Tim                 | Oakley          |

987  
988

989 **References**

990

991 Adusumilli, S., Straneo, F., Hendricks, S., Korosov, A., Lavergne, T., Lawrence, I., Marzeion, B., Otsuka, I., Schweiger, A.,  
992 Shepherd, A., Slater, D., Slater, T., Timmermanns, M.-L., and Zemp, M.: GCOS EHI 1960-2020 Cryosphere Heat Content,  
993 [https://doi.org/10.26050/WDC/GCOS\\_EHI\\_1960-2020\\_CRHC](https://doi.org/10.26050/WDC/GCOS_EHI_1960-2020_CRHC), 2022.

994 Allen, M. R. and Stott, P. A.: Estimating signal amplitudes in optimal fingerprinting, part I: theory, *Climate Dynamics*, 21,  
995 477–491, <https://doi.org/10.1007/s00382-003-0313-9>, 2003.

996 Allen, M. R., O. P. Dube, W. Solecki, F. Aragón-Durand, W. Cramer, S. Humphreys, M. Kainuma, J. Kala, N. Mahowald, Y.  
997 Mulugetta, R. Perez, M. Wairiu, and K. Zickfeld, 2018: Framing and Context. In: *Global Warming of 1.5°C. An IPCC Special*  
998 *Report on the impacts of global warming of 1.5°C above pre-industrial levels and related global greenhouse gas emission*  
999 *pathways, in the context of strengthening the global response to the threat of climate change, sustainable development, and*  
1000 *efforts to eradicate poverty* [Masson-Delmotte, V., P. Zhai, H.-O. Pörtner, D. Roberts, J. Skea, P.R. Shukla, A. Pirani, W.  
1001 Moufouma-Okia, C. Péan, R. Pidcock, S. Connors, J.B.R. Matthews, Y. Chen, X. Zhou, M.I. Gomis, E. Lonnoy, T. Maycock,  
1002 M. Tignor, and T. Waterfield (eds.)], Cambridge University Press, Cambridge, UK and New York, NY, USA, 49-92,  
1003 <https://doi.org/10.1017/9781009157940.003>, 2018.

1004 Beusch, L., Gudmundsson, L., and Seneviratne, S. I.: Emulating Earth system model temperatures with MESMER: from global  
1005 mean temperature trajectories to grid-point-level realizations on land, *Earth Syst. Dynam.*, 11, 139–159,  
1006 <https://doi.org/10.5194/esd-11-139-2020>, 2020.

1007 Chan, D., Chan, S. C., Siddons, J. T., Cable, A., Faulkner, A., Cornes, R. C., Kent, E. C., Gebbie, G., and Huybers, P.: DCENT-  
1008 I: A Globally Infilled Extension of the Dynamically Consistent ENsemble of Temperature Dataset, *Geoscience Data Journal*,  
1009 13, e70054, <https://doi.org/10.1002/gdj3.70054>, 2026.

1010 Chen, L., Xu, W., Zhou, Z., Cao, L., Yang, S., and Xu, C.: A new global land–ocean merged surface temperature dataset since  
1011 the 1850s: the CMA-GMST dataset, *Climate Dynamics*, 63, 187, <https://doi.org/10.1007/s00382-025-07614-x>, 2025.

1012 Chen, D., M. Rojas, B. H. Samset, K. Cobb, A. Diongue Niang, P. Edwards, S. Emori, S. H. Faria, E. Hawkins, P. Hope, P.  
1013 Huybrechts, M. Meinshausen, S. K. Mustafa, G.-K. Plattner, and A.-M. Tréguier, 2021: Framing, Context, and Methods. In  
1014 *Climate Change 2021: The Physical Science Basis. Contribution of Working Group I to the Sixth Assessment Report of the*  
1015 *Intergovernmental Panel on Climate Change* [Masson-Delmotte, V., P. Zhai, A. Pirani, S. L. Connors, C. Péan, S. Berger, N.  
1016 Caud, Y. Chen, L. Goldfarb, M. I. Gomis, M. Huang, K. Leitzell, E. Lonnoy, J. B. R. Matthews, T. K. Maycock, T. Waterfield,

1017 O. Yelekçi, R. Yu, and B. Zhou (eds.]. Cambridge University Press, Cambridge, United Kingdom and New York, NY, USA,  
1018 pp. 147–286, <https://doi.org/10.1017/9781009157896.003>, 2021.

1019 Cheng, L., Trenberth, K. E., Fasullo, J., Boyer, T., Abraham, J., and Zhu, J.: Improved estimates of ocean heat content from  
1020 1960 to 2015, *Sci. Adv.*, 3, e1601545, <https://doi.org/10.1126/sciadv.1601545>, 2017.

1021 Cowtan, K. and Way, R. G.: Coverage bias in the HadCRUT4 temperature series and its impact on recent temperature trends,  
1022 *Q.J.R. Meteorol. Soc.*, 140, 1935–1944, <https://doi.org/10.1002/qj.2297>, 2014.

1023 Collins M., M. Sutherland, L. Bouwer, S.-M. Cheong, T. Frölicher, H. Jacot Des Combes, M. Koll Roxy, I. Losada, K.  
1024 McInnes, B. Ratter, E. Rivera-Arriaga, R.D. Susanto, D. Swingedouw, and L. Tibig, 2019: Extremes, Abrupt Changes and  
1025 Managing Risk. In: IPCC Special Report on the Ocean and Cryosphere in a Changing Climate [H.-O. Pörtner, D.C. Roberts,  
1026 V. Masson-Delmotte, P. Zhai, M. Tignor, E. Poloczanska, K. Mintenbeck, A. Alegria, M. Nicolai, A. Okem, J. Petzold, B.  
1027 Rama, N.M. Weyer (eds.]. Cambridge University Press, Cambridge, UK and New York, NY, USA, pp. 589-655.  
1028 <https://doi.org/10.1017/9781009157964.008>, 2019.

1029 Cowtan, K., Hausfather, Z., Hawkins, E., Jacobs, P., Mann, M. E., Miller, S. K., Steinman, B. A., Stolpe, M. B., and Way, R.  
1030 G.: Robust comparison of climate models with observations using blended land air and ocean sea surface temperatures,  
1031 *Geophys. Res. Lett.*, 42, 6526–6534, <https://doi.org/10.1002/2015GL064888>, 2015.

1032 Cuesta-Valero, F. J., García-García, A., Beltrami, H., González-Rouco, J. F., and García-Bustamante, E.: Long-term global  
1033 ground heat flux and continental heat storage from geothermal data, *Clim. Past*, 17, 451–468, [https://doi.org/10.5194/cp-17-](https://doi.org/10.5194/cp-17-451-2021)  
1034 [451-2021](https://doi.org/10.5194/cp-17-451-2021), 2021.

1035 Cuesta-Valero, F. J., Beltrami, H., García-García, A., Krinner, G., Langer, M., MacDougall, A. H., Nitzbon, J., Peng, J., von  
1036 Schuckmann, K., Seneviratne, S. I., Smith, N., Thiery, W., Vanderkelen, I., and Wu, T.: Continental heat storage: Contributions  
1037 from ground, inland waters, and permafrost thawing, *Earth Syst. Dynam. Discuss.* [preprint], [https://doi.org/10.5194/esd-2022-](https://doi.org/10.5194/esd-2022-32)  
1038 [32](https://doi.org/10.5194/esd-2022-32), 2023.

1039 Deng, Z., Ciais, P., Tzompa-Sosa, Z. A., Saunio, M., Qiu, C., Tan, C., Sun, T., Ke, P., Cui, Y., Tanaka, K., Lin, X., Thompson,  
1040 R. L., Tian, H., Yao, Y., Huang, Y., Lauerwald, R., Jain, A. K., Xu, X., Bastos, A., Sitch, S., Palmer, P. I., Lauvaux, T.,  
1041 d'Aspremont, A., Giron, C., Benoit, A., Poulter, B., Chang, J., Petrescu, A. M. R., Davis, S. J., Liu, Z., Grassi, G., Albergel,  
1042 C., Tubiello, F. N., Perugini, L., Peters, W., and Chevallier, F.: Comparing national greenhouse gas budgets reported in  
1043 UNFCCC inventories against atmospheric inversions, *Earth Syst. Sci. Data*, 14, 1639–1675, [https://doi.org/10.5194/essd-14-](https://doi.org/10.5194/essd-14-1639-2022)  
1044 [1639-2022](https://doi.org/10.5194/essd-14-1639-2022), 2022.

1045 Dessler, A. E., Schoeberl, M. R., Wang, T., Davis, S. M., Rosenlof, K. H., and Vernier, J.-P.: Variations of stratospheric water  
1046 vapor over the past three decades, *J. Geophys. Res.-Atmos.*, 119, 12588-12598, <https://doi.org/10.1002/2014JD021712>, 2014.

1047 Dhomse, S. S., Mann, G. W., Antuña Marrero, J. C., Shallcross, S. E., Chipperfield, M. P., Carslaw, K. S., Marshall, L.,  
1048 Abraham, N. L., and Johnson, C. E.: Evaluating the simulated radiative forcings, aerosol properties, and stratospheric  
1049 warmings from the 1963 Mt Agung, 1982 El Chichón, and 1991 Mt Pinatubo volcanic aerosol clouds, *Atmos. Chem. Phys.*,  
1050 20, 13627–13654, <https://doi.org/10.5194/acp-20-13627-2020>, 2020.

1051 Domingues, C. M., Church, J. A., White, N. J., Gleckler, P. J., Wijffels, S. E., Barker, P. M., and Dunn, J. R.: Improved  
1052 estimates of upper-ocean warming and multi-decadal sea-level rise, *Nature*, 453, 1090–1093,  
1053 <https://doi.org/10.1038/nature07080>, 2008.

1054 Dunn, R. J. H., Alexander, L. V., Donat, M. G., Zhang, X., Bador, M., Herold, N., et al. Development of an updated global land  
1055 in situ-based dataset of temperature and precipitation extremes: HadEX3, *J. Geophys. Res.-Atmos.*, 125, e2019JD032263,  
1056 <https://doi.org/10.1029/2019JD032263R>, 2020.

1057 Durack, P. J., Naik, V., Nicholls, Z., O'Rourke, E., Turner, B., Buontempo, C., Brookshaw, A., Goddard, C., MacIntosh, C.,  
1058 Hewitt, H., & Dunne, J. P. .: Earth system forcing for CMIP7 and beyond (1.1). Zenodo.  
1059 <https://doi.org/10.5281/zenodo.15469219>. 2025.

1060 Dutton, G.S., B. D. Hall, S.A. Montzka, J. D. Nance, S. D. Clingan, K. M. Petersen, Combined Atmospheric  
1061 Chlorofluorocarbon-12 Dry Air Mole Fractions from the NOAA GML Halocarbons Sampling Network, 1977-2024, Version:  
1062 2024-03-07, <https://doi.org/10.15138/PJ63-H440>, 2024.

1063 Etminan, M., Myhre, G., Highwood, E. J., and Shine, K. P.: Radiative forcing of carbon dioxide, methane, and nitrous oxide:  
1064 A significant revision of the methane radiative forcing, *Geophys. Res. Lett.*, 43, 12614-12623,  
1065 <https://doi.org/10.1002/2016GL071930>, 2016.

1066 Eyring, V., N. P. Gillett, K.M. Achuta Rao, R. Barimalala, M. Barreiro Parrillo, N. Bellouin, C. Cassou, P. J. Durack, Y.  
1067 Kosaka, S. McGregor, S. Min, O. Morgenstern, and Y. Sun: Human Influence on the Climate System. In *Climate Change*  
1068 *2021: The Physical Science Basis. Contribution of Working Group I to the Sixth Assessment Report of the Intergovernmental*  
1069 *Panel on Climate Change*[Masson-Delmotte, V., P. Zhai, A. Pirani, S.L. Connors, C. Péan, S. Berger, N. Caud, Y. Chen, L.  
1070 Goldfarb, M.I. Gomis, M. Huang, K. Leitzell, E. Lonnoy, J.B.R. Matthews, T.K. Maycock, T. Waterfield, O. Yelekçi, R. Yu,  
1071 and B. Zhou (eds.)]. Cambridge University Press, Cambridge, United Kingdom and New York, NY, USA, pp. 423–552,  
1072 <http://doi:10.1017/9781009157896.005>, 2021.

1073 Fiore, A. M., Dentener, F. J., Wild, O., Cuvelier, C., Schultz, M. G., Hess, P., Textor, C., Schulz, M., Doherty, R. M., Horowitz,  
1074 L. W., MacKenzie, I. A., Sanderson, M. G., Shindell, D. T., Stevenson, D. S., Szopa, S., Van Dingenen, R., Zeng, G., Atherton,  
1075 C., Bergmann, D., Bey, I., Carmichael, G., Collins, W. J., Duncan, B. N., Faluvegi, G., Folberth, G., Gauss, M., Gong, S.,  
1076 Hauglustaine, D., Holloway, T., Isaksen, I. S. A., Jacob, D. J., Jonson, J. E., Kamber, J. W., Keating, T. J., Lupu, A., Marmer,  
1077 E., Montanaro, V., Park, R. J., Pitari, G., Pringle, K. J., Pyle, J. A., Schroeder, S., Vivanco, M. G., Wind, P., Wojcik, G., Wu,  
1078 S., and Zuber, A.: Multimodel estimates of intercontinental source-receptor relationships for ozone pollution, *J. Geophys. Res.*,  
1079 114, D04301, <https://doi.org/10.1029/2008JD010816>, 2009.

1080 Forster, P., T. Storelvmo, K. Armour, W. Collins, J.-L. Dufresne, D. Frame, D.J. Lunt, T. Mauritsen, M.D. Palmer, M.  
1081 Watanabe, M. Wild, and H. Zhang, 2021: The Earth's Energy Budget, Climate Feedbacks, and Climate Sensitivity. In *Climate*  
1082 *Change 2021: The Physical Science Basis. Contribution of Working Group I to the Sixth Assessment Report of the*  
1083 *Intergovernmental Panel on Climate Change [Masson-Delmotte, V., P. Zhai, A. Pirani, S.L. Connors, C. Péan, S. Berger, N.*  
1084 *Caud, Y. Chen, L. Goldfarb, M.I. Gomis, M. Huang, K. Leitzell, E. Lonnoy, J.B.R. Matthews, T.K. Maycock, T. Waterfield,*  
1085 *O. Yelekçi, R. Yu, and B. Zhou (eds.)]. Cambridge University Press, Cambridge, United Kingdom and New York, NY, USA,*  
1086 *pp. 923–1054, <https://doi.org/10.1017/9781009157896.009>, 2021.*

1087 Forster, P. M., Smith, C. J., Walsh, T., Lamb, W. F., Lamboll, R., Hauser, M., Ribes, A., Rosen, D., Gillett, N., Palmer, M.  
1088 D., Rogelj, J., von Schuckmann, K., Seneviratne, S. I., Trewin, B., Zhang, X., Allen, M., Andrew, R., Birt, A., Borger, A.,  
1089 Boyer, T., Broersma, J. A., Cheng, L., Dentener, F., Friedlingstein, P., Gutiérrez, J. M., Gütschow, J., Hall, B., Ishii, M.,  
1090 Jenkins, S., Lan, X., Lee, J.-Y., Morice, C., Kadow, C., Kennedy, J., Killick, R., Minx, J. C., Naik, V., Peters, G. P., Pirani,  
1091 A., Pongratz, J., Schleussner, C.-F., Szopa, S., Thorne, P., Rohde, R., Rojas Corradi, M., Schumacher, D., Vose, R., Zickfeld,  
1092 K., Masson-Delmotte, V., and Zhai, P.: Indicators of Global Climate Change 2022: annual update of large-scale indicators of  
1093 the state of the climate system and human influence, *Earth Syst. Sci. Data*, 15, 2295–2327, [https://doi.org/10.5194/essd-15-](https://doi.org/10.5194/essd-15-2295-2023)  
1094 [2295-2023](https://doi.org/10.5194/essd-15-2295-2023), 2023.

1095 Forster, P. M., Smith, C., Walsh, T., Lamb, W. F., Lamboll, R., Cassou, C., Hauser, M., Hausfather, Z., Lee, J.-Y., Palmer, M.  
1096 D., von Schuckmann, K., Slangen, A. B. A., Szopa, S., Trewin, B., Yun, J., Gillett, N. P., Jenkins, S., Matthews, H. D.,  
1097 Raghavan, K., Ribes, A., Rogelj, J., Rosen, D., Zhang, X., Allen, M., Aleluia Reis, L., Andrew, R. M., Betts, R. A., Borger,  
1098 A., Broersma, J. A., Burgess, S. N., Cheng, L., Friedlingstein, P., Domingues, C. M., Gambarini, M., Gasser, T., Gütschow,  
1099 J., Ishii, M., Kadow, C., Kennedy, J., Killick, R. E., Krummel, P. B., Liné, A., Monselesan, D. P., Morice, C., Mühle, J., Naik,  
1100 V., Peters, G. P., Pirani, A., Pongratz, J., Minx, J. C., Rigby, M., Rohde, R., Savita, A., Seneviratne, S. I., Thorne, P., Wells,  
1101 C., Western, L. M., van der Werf, G. R., Wijffels, S. E., Masson-Delmotte, V., and Zhai, P.: Indicators of Global Climate

1102 Change 2024: annual update of key indicators of the state of the climate system and human influence, *Earth Syst. Sci. Data*,  
1103 17, 2641–2680, <https://doi.org/10.5194/essd-17-2641-2025>, 2025.

1104 Fox-Kemper, B., Fox-Kemper, B., H. T. Hewitt, C. Xiao, G. Aðalgeirsdóttir, S.S. Drijfhout, T. L. Edwards, N. R. Golledge,  
1105 M. Hemer, R. E. Kopp, G. Krinner, A. Mix, D. Notz, S. Nowicki, I. S. Nurhati, L. Ruiz, J.-B. Sallée, A. B. A. Slangen, and Y.  
1106 Yu: Ocean, Cryosphere and Sea Level Change. In *Climate Change 2021: The Physical Science Basis. Contribution of Working*  
1107 *Group I to the Sixth Assessment Report of the Intergovernmental Panel on Climate Change* [Masson-Delmotte, V., P. Zhai,  
1108 A. Pirani, S.L. Connors, C. Péan, S. Berger, N. Caud, Y. Chen, L. Goldfarb, M.I. Gomis, M. Huang, K. Leitzell, E. Lonnoy,  
1109 J. B. R. Matthews, T. K. Maycock, T. Waterfield, O. Yelekçi, R. Yu, and B. Zhou (eds.)]. Cambridge University Press,  
1110 Cambridge, United Kingdom and New York, NY, USA, pp. 1211–1362, <https://doi.org/10.1017/9781009157896.011>, 2021.

1111 Fox-Kemper, B., Fox-Kemper, B., H. T. Hewitt, C. Xiao, G. Aðalgeirsdóttir, S.S. Drijfhout, T. L. Edwards, N. R. Golledge,  
1112 M. Hemer, R. E. Kopp, G. Krinner, A. Mix, D. Notz, S. Nowicki, I. S. Nurhati, L. Ruiz, J.-B. Sallée, A. B. A. Slangen, and Y.  
1113 Yu: Ocean, Cryosphere and Sea Level Change. In *Climate Change 2021: The Physical Science Basis. Contribution of Working*  
1114 *Group I to the Sixth Assessment Report of the Intergovernmental Panel on Climate Change* [Masson-Delmotte, V., P. Zhai,  
1115 A. Pirani, S.L. Connors, C. Péan, S. Berger, N. Caud, Y. Chen, L. Goldfarb, M.I. Gomis, M. Huang, K. Leitzell, E. Lonnoy,  
1116 J. B. R. Matthews, T. K. Maycock, T. Waterfield, O. Yelekçi, R. Yu, and B. Zhou (eds.)]. Cambridge University Press,  
1117 Cambridge, United Kingdom and New York, NY, USA, pp. 1211–1362, <https://doi.org/10.1017/9781009157896.011>, 2021.

1118 Friedlingstein, P., O'Sullivan, M., Jones, M. W., Andrew, R. M., Hauck, J., Landschützer, P., Le Quéré, C., Li, H., Luijkx, I.  
1119 T., Olsen, A., Peters, G. P., Peters, W., Pongratz, J., Schwingshackl, C., Sitch, S., Canadell, J. G., Ciais, P., Jackson, R. B.,  
1120 Alin, S. R., Arneeth, A., Arora, V., Bates, N. R., Becker, M., Bellouin, N., Berghoff, C. F., Bittig, H. C., Bopp, L., Cadule, P.,  
1121 Campbell, K., Chamberlain, M. A., Chandra, N., Chevallier, F., Chini, L. P., Colligan, T., Decayeux, J., Djeutchouang, L. M.,  
1122 Dou, X., Duran Rojas, C., Enyo, K., Evans, W., Fay, A. R., Feely, R. A., Ford, D. J., Foster, A., Gasser, T., Gehlen, M.,  
1123 Gkritzalis, T., Grassi, G., Gregor, L., Gruber, N., Gürses, Ö., Harris, I., Hefner, M., Heinke, J., Hurtt, G. C., Iida, Y., Ilyina,  
1124 T., Jacobson, A. R., Jain, A. K., Jarníková, T., Jersild, A., Jiang, F., Jin, Z., Kato, E., Keeling, R. F., Klein Goldewijk, K.,  
1125 Knauer, J., Korsbakken, J. I., Lan, X., Lauvset, S. K., Lefèvre, N., Liu, Z., Liu, J., Ma, L., Maksyutov, S., Marland, G., Mayot,  
1126 N., McGuire, P. C., Metz, N., Monacci, N. M., Morgan, E. J., Nakaoka, S.-I., Neill, C., Niwa, Y., Nützel, T., Olivier, L., Ono,  
1127 T., Palmer, P. I., Pierrot, D., Qin, Z., Resplandy, L., Roobaert, A., Rosan, T. M., Rödenbeck, C., Schwinger, J., Smallman, T.  
1128 L., Smith, S. M., Sospedra-Alfonso, R., Steinhoff, T., Sun, Q., Sutton, A. J., Séférian, R., Takao, S., Tatebe, H., Tian, H.,  
1129 Tilbrook, B., Torres, O., Tourigny, E., Tsujino, H., Tubiello, F., van der Werf, G., Wanninkhof, R., Wang, X., Yang, D., Yang,

1130 X., Yu, Z., Yuan, W., Yue, X., Zaehle, S., Zeng, N., and Zeng, J.: Global Carbon Budget 2024, *Earth Syst. Sci. Data*, 17, 965–  
1131 1039, <https://doi.org/10.5194/essd-17-965-2025>, 2025.

1132 Fueglistaler, S. and Haynes, P. H.: Control of interannual and longer-term variability of stratospheric water vapor, *J. Geophys.*  
1133 *Res.*, 110, D24108, <https://doi.org/10.1029/2005JD006019>, 2005.

1134 Gettelman, A., Christensen, M. A., Diamond, M. S., Gryspeerdt, E., Manshausen, P., Sieir, P., Watson-Parris, D., Yang, M.,  
1135 Yoshioka, M., and Yuan, T.: Has Reducing Ship Emissions Brought Forward Global Warming?, *Geophys. Res. Lett.*, 2024.

1136 Gillett, N. P., Shiogama, H., Funke, B., Hegerl, G., Knutti, R., Matthes, K., Santer, B. D., Stone, D., and Tebaldi, C.: The  
1137 Detection and Attribution Model Intercomparison Project (DAMIP v1.0) contribution to CMIP6, *Geosci. Model. Dev.*, 9,  
1138 3685–3697, <https://doi.org/10.5194/gmd-9-3685-2016>, 2016.

1139 Gillett, N.P., Kirchmeier-Young, M., Ribes, A., Shiogama, H., Hegerl, G.C., Knutti, R., Gastineau, G., John, J.G., Li, L.,  
1140 Nazarenko, L., Rosenbloom, N., Seland, Ø., Wu, T., Yukimoto, S., and Ziehn, T.: Constraining human contributions to  
1141 observed warming since the pre-industrial period, *Nat. Clim. Chang.*, 11, 207–212, [https://doi.org/10.1038/s41558-020-00965-](https://doi.org/10.1038/s41558-020-00965-9)  
1142 [9](https://doi.org/10.1038/s41558-020-00965-9), 2021.

1143 Good, S. A., Martin, M. J., and Rayner, N. A.: EN4: Quality controlled ocean temperature and salinity profiles and monthly  
1144 objective analyses with uncertainty estimates, THE EN4 DATA SET, *J. Geophys. Res.-Oceans*, 118, 6704–6716,  
1145 <https://doi.org/10.1002/2013JC009067>, 2013.

1146 Grassi, G., Federici, S., Abad-Vinas, R., Korosuo, A., and Rossi, S.: LULUCF data based on National GHG inventories  
1147 (NGHGI DB), Zenodo [data set], <https://doi.org/10.5281/zenodo.7190601>, 2022.

1148 Gulev, S. K., P. W. Thorne, J. Ahn, F. J. Dentener, C. M. Domingues, S. Gerland, D. Gong, D. S. Kaufman, H. C. Nnamchi,  
1149 J. Quaas, J.A. Rivera, S. Sathyendranath, S.L. Smith, B. Trewin, K. von Schuckmann, and R. S. Vose: Changing State of the  
1150 Climate System. In *Climate Change 2021: The Physical Science Basis. Contribution of Working Group I to the Sixth*  
1151 *Assessment Report of the Intergovernmental Panel on Climate Change*[Masson-Delmotte, V., P. Zhai, A. Pirani, S.L. Connors,  
1152 C. Péan, S. Berger, N. Caud, Y. Chen, L. Goldfarb, M.I. Gomis, M. Huang, K. Leitzell, E. Lonnoy, J.B.R. Matthews, T.K.  
1153 Maycock, T. Waterfield, O. Yelekçi, R. Yu, and B. Zhou (eds.)]. Cambridge University Press, Cambridge, United Kingdom  
1154 and New York, NY, USA, pp. 287–422, <https://doi.org/10.1017/9781009157896.004>, 2021.

1155 Granier, C., Darras, S., Denier van der Gon, H., Doubalova, J., Elguindi, N., Galle, B., Gauss, M., Guevara, M., Jalkanen, J.-  
1156 P., Kuenen, J., Liousse, C., Quack, B., Simpson, D., and Sindelarova, K.: The Copernicus Atmosphere Monitoring Service  
1157 global and regional emissions (April 2019 version), <https://doi.org/10.24380/D0BN-KX16>, n.d, 2019.

1158 Gütschow, J., Busch, D., and Pflüger, M.: The PRIMAP-hist national historical emissions time series (1750-2024) v2.7,  
1159 Zenodo [data set], <https://doi.org/10.5281/zenodo.17090760>, 2025.

1160 Jalkanen, J.-P., Johansson, L., Kukkonen, J., Brink, A., Kalli, J., and Stipa, T.: Extension of an assessment model of ship traffic  
1161 exhaust emissions for particulate matter and carbon monoxide, *Atmospheric Chemistry and Physics*, 12, 2641–2659,  
1162 <https://doi.org/10.5194/acp-12-2641-2012>, 2012.

1163 Jalkanen, J.-P., Johansson, L., and Kukkonen, J.: A comprehensive inventory of ship traffic exhaust emissions in the European  
1164 sea areas in 2011, *Atmos. Chem. Phys.*, 16, 71–84, <https://doi.org/10.5194/acp-16-71-2016>, 2016.

1165 Johansson, L., Jalkanen, J.-P., and Kukkonen, J.: Global assessment of shipping emissions in 2015 on a high spatial and  
1166 temporal resolution, *Atmospheric Environment*, 167, 403–415, <https://doi.org/10.1016/j.atmosenv.2017.08.042>, 2017.

1167 Hausteine, K., Allen, M. R., Forster, P. M., Otto, F. E. L., Mitchell, D. M., Matthews, H. D., and Frame, D. J.: A real-time  
1168 Global Warming Index, *Sci Rep*, 7, 15417, <https://doi.org/10.1038/s41598-017-14828-5>, 2017.

1169 Hersbach H., Bell, B., Berrisford, P. et al.: The ERA5 global reanalysis, *Quat. Jour. R. Met. Soc.*, 146:1999–2049,  
1170 <https://doi.org/10.1002/qj.3803>, 2020.

1171 Hodnebrog, Ø., Myhre, G., Kramer, R. J., Shine, K. P., Andrews, T., Faluvegi, G., Kasoar, M., Kirkevåg, A., Lamarque, J.-F.,  
1172 Mülmenstädt, J., Olivie, D., Samset, B. H., Shindell, D., Smith, C. J., Takemura, T., and Voulgarakis, A.: The effect of rapid  
1173 adjustments to halocarbons and N<sub>2</sub>O on radiative forcing, *npj Clim. Atmos. Sci.*, 3, 43, [https://doi.org/10.1038/s41612-020-](https://doi.org/10.1038/s41612-020-00150-x)  
1174 [00150-x](https://doi.org/10.1038/s41612-020-00150-x), 2020a.

1175 Hodnebrog, Ø., Aamaas, B., Fuglestedt, J. S., Marston, G., Myhre, G., Nielsen, C. J., et al.: Updated global warming potentials  
1176 and radiative efficiencies of halocarbons and other weak atmospheric absorbers, *Rev. Geophys.*, 58, e2019RG000691,  
1177 <https://doi.org/10.1029/2019RG000691>, 2020b.

1178 Hurst, D. F., Oltmans, S. J., Vömel, H., Rosenlof, K. H., Davis, S. M., Ray, E. A., Hall, E. G., and Jordan, A. F.: Stratospheric  
1179 water vapor trends over Boulder, Colorado: Analysis of the 30 year Boulder record, *J. Geophys. Res.-Atmos.*, 116,  
1180 <https://doi.org/10.1029/2010JD015065>, 2011.

1181 Huang, B., Yin, X., Menne, M., Vose, R., and Zhang, H.M.: Improvements to the land surface air temperature reconstruction  
1182 in NOAA GlobalTemp: An artificial neural network approach, *Artificial Intelligence for the Earth Systems*, 1, 3,  
1183 <https://journals.ametsoc.org/view/journals/aies/1/4/AIES-D-22-0032.1.xml>, 2020.

1184 IATA: Global Outlook for Air Transport: Times of Turbulence, IATA, [http://www.iata.org/en/iata-](http://www.iata.org/en/iata-repository/publications/economic-reports/global-outlook-for-air-transport-december-2024/)  
1185 [repository/publications/economic-reports/global-outlook-for-air-transport-december-2024/](http://www.iata.org/en/iata-repository/publications/economic-reports/global-outlook-for-air-transport-december-2024/), 2024.

1186 IEA: World oil statistics (Edition 2024), IEA Oil Information Statistics (database), <https://doi.org/10.1787/558987b9-en>, 2024  
1187 (accessed on 24 April 2024).

1188 Ishii, M., Fukuda, Y., Hirahara, S., Yasui, S., Suzuki, T., and Sato, K.: Accuracy of Global Upper Ocean Heat Content  
1189 Estimation Expected from Present Observational Data Sets, SOLA, 13, 163–167, <https://doi.org/10.2151/sola.2017-030>, 2017.

1190 Jenkins, S., Smith, C., Allen, M., and Grainger, R.: Tonga eruption increases chance of temporary surface temperature anomaly  
1191 above 1.5 °C, Nature Clim. Chang., 13, 127–129, <https://doi.org/10.1038/s41558-022-01568-2>, 2023.

1192 Joshi, M. M. and Jones, G. S.: The climatic effects of the direct injection of water vapour into the stratosphere by large volcanic  
1193 eruptions, Atmos. Chem. Phys., 9, 6109–6118, <https://doi.org/10.5194/acp-9-6109-2009>, 2009.

1194 Jungclaus, J. H., Bard, E., Baroni, M., Braconnot, P., Cao, J., Chini, L. P., Egorova, T., Evans, M., González-Rouco, J. F.,  
1195 Goosse, H., Hurtt, G. C., Joos, F., Kaplan, J. O., Khodri, M., Klein Goldewijk, K., Krivova, N., LeGrande, A. N., Lorenz, S.  
1196 J., Luterbacher, J., Man, W., Maycock, A. C., Meinshausen, M., Moberg, A., Muscheler, R., Nehrbass-Ahles, C., Otto-  
1197 Bliesner, B. I., Phipps, S. J., Pongratz, J., Rozanov, E., Schmidt, G. A., Schmidt, H., Schmutz, W., Schurer, A., Shapiro, A. I.,  
1198 Sigl, M., Smerdon, J. E., Solanki, S. K., Timmreck, C., Toohey, M., Usoskin, I. G., Wagner, S., Wu, C.-J., Yeo, K. L.,  
1199 Zanchettin, D., Zhang, Q., and Zorita, E.: The PMIP4 contribution to CMIP6 – Part 3: The last millennium, scientific objective,  
1200 and experimental design for the PMIP4 past1000 simulations, Geosci. Model Dev., 10, 4005–4033,  
1201 <https://doi.org/10.5194/gmd-10-4005-2017>, 2017.

1202 Kadow, C., Hall, D. M., and Ulbrich, U.: Artificial intelligence reconstructs missing climate information, Nat. Geosci., 13,  
1203 408–413, <https://doi.org/10.1038/s41561-020-0582-5>, 2020.

1204 Kadow, C., Plésiat, É., and Lenssen, N.: Annual update of Climate Reconstruction AI (CRAI) infilled HadCRUT5 of near-  
1205 surface temperature change 1850 to 2024 [Data set]. Zenodo. <https://doi.org/10.5281/zenodo.15622091>, 2025.

1206 Keeble, J., Hassler, B., Banerjee, A., Checa-Garcia, R., Chiodo, G., Davis, S., Eyring, V., Griffiths, P. T., Morgenstern, O.,  
1207 Nowack, P., Zeng, G., Zhang, J., Bodeker, G., Burrows, S., Cameron-Smith, P., Cugnet, D., Danek, C., Deushi, M., Horowitz,  
1208 L. W., Kubin, A., Li, L., Lohmann, G., Michou, M., Mills, M. J., Nabat, P., Olivie, D., Park, S., Seland, Ø., Stoll, J., Wieners,  
1209 K.-H., and Wu, T.: Evaluating stratospheric ozone and water vapour changes in CMIP6 models from 1850 to 2100, Atmos.  
1210 Chem. Phys., 21, 5015–5061, <https://doi.org/10.5194/acp-21-5015-2021>, 2021.

1211 Kovilakam, M., Thomason, L. W., Ernest, N., Rieger, L., Bourassa, A., and Millán, L.: The Global Space-based Stratospheric  
1212 Aerosol Climatology (version 2.0): 1979–2018, Earth Syst. Sci. Data, 12, 2607–2634, [https://doi.org/10.5194/essd-12-2607-](https://doi.org/10.5194/essd-12-2607-2020)  
1213 [2020](https://doi.org/10.5194/essd-12-2607-2020), 2020.

1214 Lamb, W. F., Andrew, R. M., Jones, M., Nicholls, Z., Peters, G. P., Smith, C., Saunio, M., Grassi, G., Pongratz, J., Smith, S.  
1215 J., Tubiello, F. N., Crippa, M., Gidden, M., Friedlingstein, P., Minx, J., and Forster, P. M.: Differences in anthropogenic  
1216 greenhouse gas emissions estimates explained, *Earth System Science Data*, 18, 2549–2572, [https://doi.org/10.5194/essd-18-](https://doi.org/10.5194/essd-18-2549-2026)  
1217 [2549-2026](https://doi.org/10.5194/essd-18-2549-2026), 2026.

1218 Lan, X., Tans, P. and Thoning, K.W.: Trends in globally-averaged CO<sub>2</sub> determined from NOAA Global Monitoring Laboratory  
1219 measurements, Version Monday, 14-Apr-2025 09:08:57 MDT <https://doi.org/10.15138/9N0H-ZH07>, 2025.

1220 Laufkötter, C., Zscheischler, J., and Frölicher, T. L.: High-impact marine heatwaves attributable to human-induced global  
1221 warming, *Science*, 369, 6511, <https://doi.org/10.1126/science.aba0690>, 2020.

1222 Leach, N. J., Jenkins, S., Nicholls, Z., Smith, C. J., Lynch, J., Cain, M., Walsh, T., Wu, B., Tsutsui, J., and Allen, M. R.:  
1223 FaIRv2.0.0: a generalized impulse response model for climate uncertainty and future scenario exploration, *Geosci. Model*  
1224 *Dev.*, 14, 3007–3036, <https://doi.org/10.5194/gmd-14-3007-2021>, 2021.

1225 Lee, D. S., Fahey, D. W., Skowron, A., Allen, M. R., Burkhardt, U., Chen, Q., Doherty, S. J., Freeman, S., Forster, P. M.,  
1226 Fuglestedt, J., Gettelman, A., León, R. R. D., Lim, L. L., Lund, M. T., Millar, R. J., Owen, B., Penner, J. E., Pitari, G., Prather,  
1227 M. J., Sausen, R., and Wilcox, L. J.: The contribution of global aviation to anthropogenic climate forcing for 2000 to 2018,  
1228 *Atmos. Environ.*, 244, 117834, <https://doi.org/10.1016/j.atmosenv.2020.117834>, 2021.

1229 Lee, J.-Y., J. Marotzke, G. Bala, L. Cao, S. Corti, J.P. Dunne, F. Engelbrecht, E. Fischer, J.C. Fyfe, C. Jones, A. Maycock, J.  
1230 Mutemi, O. Ndiaye, S. Panickal, and T. Zhou: Future Global Climate: Scenario-Based Projections and Near-Term Information.  
1231 In *Climate Change 2021: The Physical Science Basis. Contribution of Working Group I to the Sixth Assessment Report of the*  
1232 *Intergovernmental Panel on Climate Change*[Masson-Delmotte, V., P. Zhai, A. Pirani, S.L. Connors, C. Péan, S. Berger, N.  
1233 Caud, Y. Chen, L. Goldfarb, M.I. Gomis, M. Huang, K. Leitzell, E. Lonnoy, J.B.R. Matthews, T.K. Maycock, T. Waterfield,  
1234 O. Yelekçi, R. Yu, and B. Zhou (eds.)]. Cambridge University Press, Cambridge, United Kingdom and New York, NY, USA,  
1235 pp. 553–672, <https://doi.org/10.1017/9781009157896.006>, 2021.

1236 Lee, H., K. Calvin, D. Dasgupta, G. Krinner, A. Mukherji, P. Thorne, C. Trisos, J. Romero, P. Aldunce, K. Barrett, G. Blanco,  
1237 W.W.L. Cheung, S.L. Connors, F. Denton, A. Diongue-Niang, D. Dodman, M. Garschagen, O. Geden, B. Hayward, C. Jones,  
1238 F. Jotzo, T. Krug, R. Lasco, J.-Y. Lee, V. Masson-Delmotte, M. Meinshausen, K. Mintenbeck, A. Mokssit, F.E.L. Otto, M.  
1239 Pathak, A. Pirani, E. Poloczanska, H.-O. Pörtner, A. Revi, D.C. Roberts, J. Roy, A.C. Ruane, J. Skea, P.R. Shukla, R. Slade,  
1240 A. Slangen, Y. Sokona, A.A. Sörensson, M. Tignor, D. van Vuuren, Y.-M. Wei, H. Winkler, P. Zhai, and Z. Zommers:  
1241 *Synthesis Report of the IPCC Sixth Assessment Report (AR6): Summary for Policymakers. Intergovernmental Panel on*  
1242 *Climate Change* [accepted], available at <https://www.ipcc.ch/report/ar6/syr/>, 2023.

1243 Lensen, N. J. L., Schmidt, G. A., Hansen, J. E., Menne, M. J., Persin, A., Ruedy, R., and Zyss, D.: Improvements in the  
1244 GISTEMP Uncertainty Model, *J. Geophys. Res.-Atmos.*, 124, 6307–6326, <https://doi.org/10.1029/2018JD029522>, 2019.

1245 Levitus, S., Antonov, J. I., Boyer, T. P., Baranova, O. K., Garcia, H. E., Locarnini, R. A., Mishonov, A. V., Reagan, J. R.,  
1246 Seidov, D., Yarosh, E. S., and Zweng, M. M.: World ocean heat content and thermosteric sea level change (0–2000 m), 1955–  
1247 2010, *Geophys. Res. Lett.*, 39, <https://doi.org/10.1029/2012GL051106>, 2012.

1248 Matthes, K., Funke, B., Andersson, M. E., Barnard, L., Beer, J., Charbonneau, P., Clilverd, M. A., Dudok de Wit, T.,  
1249 Haberreiter, M., Hendry, A., Jackman, C. H., Kretzschmar, M., Kruschke, T., Kunze, M., Langematz, U., Marsh, D. R.,  
1250 Maycock, A. C., Misios, S., Rodger, C. J., Scaife, A. A., Seppälä, A., Shangquan, M., Sinnhuber, M., Tourpali, K., Usoskin,  
1251 I., van de Kamp, M., Verronen, P. T., and Versick, S.: Solar forcing for CMIP6 (v3.2), *Geosci. Model Dev.*, 10, 2247–2302,  
1252 <https://doi.org/10.5194/gmd-10-2247-2017>, 2017.

1253 Melo, J., Rossi, S., Achard, F., Alkama, R., Canadell, J. G., Friedlingstein, P., Gibbs, D., Harris, N., Heinrich, V., O’Sullivan,  
1254 M., Peters, G., Pongratz, J., Rose, M., Roman-Cuesta, R., Sanz Sanchez, M. J., Schwingshackl, C., Sitch, S., and Grassi, G.:  
1255 The LULUCF data hub: translating global land use emissions estimates into the national GHG inventory framework (Version  
1256 3.0, 2025 NGHGI release) (3.0), Zenodo [data set], <https://doi.org/10.5281/zenodo.17153438>, 2025.

1257 Meinshausen, M., Nicholls, Z. R. J., Lewis, J., Gidden, M. J., Vogel, E., Freund, M., Beyerle, U., Gessner, C., Nauels, A.,  
1258 Bauer, N., Canadell, J. G., Daniel, J. S., John, A., Krummel, P. B., Luderer, G., Meinshausen, N., Montzka, S. A., Rayner, P.  
1259 J., Reimann, S., Smith, S. J., van den Berg, M., Velders, G. J. M., Vollmer, M. K., and Wang, R. H. J.: The shared socio-  
1260 economic pathway (SSP) greenhouse gas concentrations and their extensions to 2500, *Geosci. Model Dev.*, 13, 3571–3605,  
1261 <https://doi.org/10.5194/gmd-13-3571-2020>, 2020.

1262 Millán, L., Santee, M. L., Lambert, A., Livesey, N. J., Werner, F., Schwartz, M. J., Pumphrey, H. C., Manney, G. L., Wang,  
1263 Y., Su, H., Wu, L., Read, W. G., and Froidevaux, L.: The Hunga Tonga-Hunga Ha’apai Hydration of the Stratosphere,  
1264 *Geophys. Res. Lett.*, 49, e2022GL099381, <https://doi.org/10.1029/2022GL099381>, 2022.

1265 Millar, R. J., Nicholls, Z. R., Friedlingstein, P., and Allen, M. R.: A modified impulse-response representation of the global  
1266 near-surface air temperature and atmospheric concentration response to carbon dioxide emissions, *Atmos. Chem. Phys.*, 17,  
1267 7213–7228, <https://doi.org/10.5194/acp-17-7213-2017>, 2017.

1268 Minx, J. C., Lamb, W. F., Andrew, R. M., Canadell, J. G., Crippa, M., Döbbeling, N., Forster, P. M., Guizzardi, D., Olivier,  
1269 J., Peters, G. P., Pongratz, J., Reisinger, A., Rigby, M., Saunio, M., Smith, S. J., Solazzo, E., and Tian, H.: A comprehensive  
1270 and synthetic dataset for global, regional, and national greenhouse gas emissions by sector 1970–2018 with an extension to  
1271 2019, *Earth Syst. Sci. Data*, 13, 5213–5252, <https://doi.org/10.5194/essd-13-5213-2021>, 2021.

1272 Morice, C. P., Kennedy, J. J., Rayner, N. A., Winn, J. P., Hogan, E., Killick, R. E., Dunn, R. J. H., Osborn, T. J., Jones, P. D.,  
1273 and Simpson, I. R.: An Updated Assessment of Near-Surface Temperature Change From 1850: The HadCRUT5 Data Set, *J.*  
1274 *Geophys. Res.-Atmos.*, 126, e2019JD032361, <https://doi.org/10.1029/2019JD032361>, 2021.

1275 Myhre, G., Samset, B. H., Schulz, M., Balkanski, Y., Bauer, S., Bernsten, T. K., Bian, H., Bellouin, N., Chin, M., Diehl, T.,  
1276 Easter, R. C., Feichter, J., Ghan, S. J., Hauglustaine, D., Iversen, T., Kinne, S., Kirkevåg, A., Lamarque, J.-F., Lin, G., Liu, X.,  
1277 Lund, M. T., Luo, G., Ma, X., van Noije, T., Penner, J. E., Rasch, P. J., Ruiz, A., Seland, Ø., Skeie, R. B., Stier, P., Takemura,  
1278 T., Tsigaridis, K., Wang, P., Wang, Z., Xu, L., Yu, H., Yu, F., Yoon, J.-H., Zhang, K., Zhang, H., and Zhou, C.: Radiative  
1279 forcing of the direct aerosol effect from AeroCom Phase II simulations, *Atmos. Chem. Phys.*, 13, 1853–1877,  
1280 <https://doi.org/10.5194/acp-13-1853-2013>, 2013a.

1281 Myhre, G., D. Shindell, F.-M. Bréon, W. Collins, J. Fuglestedt, J. Huang, D. Koch, J.-F. Lamarque, D. Lee, B. Mendoza, T.  
1282 Nakajima, A. Robock, G. Stephens, T. Takemura and H. Zhang: Anthropogenic and Natural Radiative Forcing. In: *Climate*  
1283 *Change 2013: The Physical Science Basis. Contribution of Working Group I to the Fifth Assessment Report of the*  
1284 *Intergovernmental Panel on Climate Change*, edited by Stocker, T.F., D. Qin, G.-K. Plattner, M. Tignor, S.K. Allen, J.  
1285 Boschung, A. Nauels, Y. Xia, V. Bex and P.M. Midgley (eds.]. Cambridge University Press, Cambridge, United Kingdom  
1286 and New York, NY, USA, <https://doi.org/10.1017/CBO9781107415324.018>, 2013b.

1287 Nicholls Z., Lewis J., Makin M., et al. Regionally aggregated, stitched and de-drifted CMIP-climate data, processed with  
1288 netCDF-SCM v2.0.0. *Geosci Data J.*, 8, 154–198, <https://doi.org/10.1002/gdj3.113>, 2021.

1289 Nitzbon, J., Krinner, G., Langer, M.: GCOS EHI 1960–2020 Permafrost Heat Content, World Data Center for Climate (WDCC)  
1290 at DKRZ, [https://doi.org/10.26050/WDCC/GCOS\\_EHI\\_1960-2020\\_PHC](https://doi.org/10.26050/WDCC/GCOS_EHI_1960-2020_PHC), 2022b.

1291 Otto, F. E. L., Frame, D. J., Otto, A., and Allen, M. R.: Embracing uncertainty in climate change policy, *Nature Clim. Chang.*,  
1292 5, 917–920, <https://doi.org/10.1038/nclimate2716>, 2015.

1293 Palmer, M. D., Domingues, C. M., Slangen, A. B. A., and Dias, F. B.: An ensemble approach to quantify global mean sea-  
1294 level rise over the 20th century from tide gauge reconstructions, *Environ. Res. Lett.*, 16, 044043, [https://doi.org/10.1088/1748-](https://doi.org/10.1088/1748-9326/abdaec)  
1295 [9326/abdaec](https://doi.org/10.1088/1748-9326/abdaec), 2021.

1296 Purkey, S.G. and Johnson, G.C., Warming of Global Abyssal and Deep Southern Ocean Waters between the 1990s and 2000s:  
1297 Contributions to Global Heat and Sea Level Rise Budgets, *J. Climate*, 23, 6336–6351,  
1298 <https://doi.org/10.1175/2010JCLI3682.1>, 2010.

1299 Prinn, R. G., Weiss, R. F., Arduini, J., Arnold, T., DeWitt, H. L., Fraser, P. J., Ganesan, A. L., Gasore, J., Harth, C. M.,  
1300 Hermansen, O., Kim, J., Krummel, P. B., Li, S., Loh, Z. M., Lunder, C. R., Maione, M., Manning, A. J., Miller, B. R.,

1301 Mitrevski, B., Mühle, J., O'Doherty, S., Park, S., Reimann, S., Rigby, M., Saito, T., Salameh, P. K., Schmidt, R., Simmonds,  
1302 P. G., Steele, L. P., Vollmer, M. K., Wang, R. H., Yao, B., Yokouchi, Y., Young, D., and Zhou, L.: History of chemically and  
1303 radiatively important atmospheric gases from the Advanced Global Atmospheric Gases Experiment (AGAGE), *Earth Syst.*  
1304 *Sci. Data*, 10, 985–1018, <https://doi.org/10.5194/essd-10-985-2018>, 2018.

1305 Qasmi, S. and Ribes, A.: Reducing uncertainty in local temperature projections, *Sci. Adv.*, 8, eabo6872,  
1306 <https://doi.org/10.1126/sciadv.abo6872>, 2022.

1307 Riahi, K., Schaeffer, J. Arango, K. Calvin, C. Guivarch, T. Hasegawa, K. Jiang, E. Kriegler, R. Matthews, G.P. Peters, A. Rao,  
1308 S. Robertson, A.M. Sebbit, J. Steinberger, M. Tavoni, D.P. van Vuuren, 2022: Mitigation pathways compatible with long-term  
1309 goals. In IPCC, 2022: Climate Change 2022: Mitigation of Climate Change. Contribution of Working Group III to the Sixth  
1310 Assessment Report of the Intergovernmental Panel on Climate Change [P.R. Shukla, J. Skea, R. Slade, A. Al Khourdjie, R.  
1311 van Diemen, D. McCollum, M. Pathak, S. Some, P. Vyas, R. Fradera, M. Belkacemi, A. Hasija, G. Lisboa, S. Luz, J. Malley,  
1312 (eds.)]. Cambridge University Press, Cambridge, UK and New York, NY, USA, <https://doi.org/10.1017/9781009157926.005>,  
1313 2022.

1314 Ribes, A., Planton, S., and Terray, L.: Application of regularised optimal fingerprinting to attribution. Part I: method, properties  
1315 and idealised analysis, *Clim. Dyn.*, 41, 2817–2836, <https://doi.org/10.1007/s00382-013-1735-7>, 2013.

1316 Ribes, A., Qasmi, S., and Gillett, N. P.: Making climate projections conditional on historical observations, *Sci. Adv.*, 7,  
1317 eabc0671, <https://doi.org/10.1126/sciadv.abc0671>, 2021.

1318 Richardson, M., Cowtan, K., and Millar, R. J.: Global temperature definition affects achievement of long-term climate goals,  
1319 *Environ. Res. Lett.*, 13, 054004, <https://doi.org/10.1088/1748-9326/aab305>, 2018.

1320 Rogelj, J., Schaeffer, M., Meinshausen, M., Shindell, D. T., Hare, W., Klimont, Z., Velders, G. J., Amann, M., and  
1321 Schellnhuber, H. J.: Disentangling the effects of CO<sub>2</sub> and short-lived climate forcer mitigation, *Proc. Natl. Acad. Sci. USA*,  
1322 111 (46), 16325–16330, <https://doi.org/10.1073/pnas.1415631111>, 2014a.

1323 Rogelj, J., D. Shindell, K. Jiang, S. Fifita, P. Forster, V. Ginzburg, C. Handa, H. Kheshgi, S. Kobayashi, E. Kriegler, L.  
1324 Mundaca, R. Séférian, and M. V. Vilariño: Mitigation Pathways Compatible with 1.5°C in the Context of Sustainable  
1325 Development. In: *Global Warming of 1.5°C. An IPCC Special Report on the impacts of global warming of 1.5°C above pre-*  
1326 *industrial levels and related global greenhouse gas emission pathways, in the context of strengthening the global response to*  
1327 *the threat of climate change, sustainable development, and efforts to eradicate poverty* [Masson-Delmotte, V., P. Zhai, H.-O.  
1328 Pörtner, D. Roberts, J. Skea, P.R. Shukla, A. Pirani, W. Moufouma-Okia, C. Péan, R. Pidcock, S. Connors, J. B. R. Matthews,

1329 Y. Chen, X. Zhou, M. I. Gomis, E. Lonnoy, T. Maycock, M. Tignor, and T. Waterfield (eds.]. Cambridge University Press,  
1330 Cambridge, UK and New York, NY, USA, pp. 93-174, <https://doi.org/10.1017/9781009157940.004>, 2018.

1331 Rogelj, J., Rao, S., McCollum, D. L., Pachauri, S., Klimont, Z., Krey, V., and Riahi, K: Air-pollution emission ranges  
1332 consistent with the representative concentration pathways, *Nature Clim. Chang.*, 4 (6), 446–450,  
1333 <https://doi.org/10.1038/nclimate2178>, 2014b.

1334 Rogelj, J., Lamboll, R.D.: Substantial reductions in non-CO2 greenhouse gas emissions reductions implied by IPCC estimates  
1335 of the remaining carbon budget. *Communications Earth Environ* 5, 35. <https://doi.org/10.1038/s43247-023-01168-8>, 2024.

1336 Rohde, R., Muller, R., Jacobsen, R., Perlmutter, S., Rosenfeld, A., Wurtele, J., Curry, J., Wickham, C., and Mosher, S.:  
1337 Berkeley Earth temperature averaging process, *Geoinfor. Geostat.: An Overview*, 1, [https://doi.org/10.4172/2327-](https://doi.org/10.4172/2327-4581.1000103)  
1338 [4581.1000103](https://doi.org/10.4172/2327-4581.1000103), 2013.

1339 Rohde, R. A. and Hausfather, Z.: The Berkeley Earth Land/Ocean Temperature Record, *Earth Sys. Sci. Data*, 12, 3469–3479,  
1340 <https://doi.org/10.5194/essd-12-3469-2020>, 2020.

1341 Sellitto, P., Podglajen, A., Belhadji, R., Boichu, M., Carboni, E., Cuesta, J., Duchamp, C., Kloss, C., Siddans, R., Bègue, N.,  
1342 Blarel, L., Jegou, F., Khaykin, S., Renard, J.B., Legras, B.: The unexpected radiative impact of the Hunga Tonga eruption of  
1343 15th January 2022, *Commun. Earth. Environ.*, 3, 288, <https://doi.org/10.1038/s43247-022-00618-z>, 2022.

1344 von Schuckmann, K., Cheng, L., Palmer, M. D., Hansen, J., Tassone, C., Aich, V., Adusumilli, S., Beltrami, H., Boyer, T.,  
1345 Cuesta-Valero, F. J., Desbruyères, D., Domingues, C., García-García, A., Gentine, P., Gilson, J., Gorfer, M., Haimberger, L.,  
1346 Ishii, M., Johnson, G. C., Killick, R., King, B. A., Kirchengast, G., Kolodziejczyk, N., Lyman, J., Marzeion, B., Mayer, M.,  
1347 Monier, M., Monselesan, D. P., Purkey, S., Roemmich, D., Schweiger, A., Seneviratne, S. I., Shepherd, A., Slater, D. A.,  
1348 Steiner, A. K., Straneo, F., Timmermans, M.-L., and Wijffels, S. E.: Heat stored in the Earth system: where does the energy  
1349 go?, *Earth Syst. Sci. Data*, 12, 2013–2041, <https://doi.org/10.5194/essd-12-2013-2020>, 2020.

1350 von Schuckmann, K., Minière, A., Gues, F., Cuesta-Valero, F. J., Kirchengast, G., Adusumilli, S., Straneo, F., Ablain, M.,  
1351 Allan, R. P., Barker, P. M., Beltrami, H., Blazquez, A., Boyer, T., Cheng, L., Church, J., Desbruyeres, D., Dolman, H.,  
1352 Domingues, C. M., García-García, A., Giglio, D., Gilson, J. E., Gorfer, M., Haimberger, L., Hakuba, M. Z., Hendricks, S.,  
1353 Hosoda, S., Johnson, G. C., Killick, R., King, B., Kolodziejczyk, N., Korosov, A., Krinner, G., Kuusela, M., Landerer, F. W.,  
1354 Langer, M., Lavergne, T., Lawrence, I., Li, Y., Lyman, J., Marti, F., Marzeion, B., Mayer, M., MacDougall, A. H., McDougall,  
1355 T., Monselesan, D. P., Nitzbon, J., Otsuka, I., Peng, J., Purkey, S., Roemmich, D., Sato, K., Sato, K., Savita, A., Schweiger,  
1356 A., Shepherd, A., Seneviratne, S. I., Simons, L., Slater, D. A., Slater, T., Steiner, A. K., Suga, T., Szekely, T., Thiery, W.,

1357 Timmermans, M.-L., Vanderkelen, I., Wjiffels, S. E., Wu, T., and Zemp, M.: Heat stored in the Earth system 1960–2020:  
1358 where does the energy go?, *Earth System Science Data*, 15, 1675–1709, <https://doi.org/10.5194/essd-15-1675-2023>, 2023.

1359 Shine, K.P., Derwent, R.G., Wuebbles, D.J., and Morcrette, J.-J.: Radiative Forcing of Climate. In *Climate Change: The IPCC*  
1360 *Scientific Assessment (1990)*, J.T. Houghton, G.J. Jenkins and J.J. Ephraums (eds.). Cambridge University Press, Cambridge,  
1361 Great Britain, New York, NY, USA and Melbourne, Australia, 1990.

1362 Sigl, M., Toohey, M., McConnell, J. R., Cole-Dai, J., and Severi, M.: Volcanic stratospheric sulfur injections and aerosol  
1363 optical depth during the Holocene (past 11\,500 years) from a bipolar ice-core array, *Earth Syst. Sci. Data*, 14, 3167–3196,  
1364 <https://doi.org/10.5194/essd-14-3167-2022>, 2022.

1365 Skeie, R. B., Myhre, G., Hodnebrog, Ø., Cameron-Smith, P. J., Deushi, M., Hegglin, M. I., Horowitz, L. W., Kramer, R. J.,  
1366 Michou, M., Mills, M. J., Olivie, D. J. L., Connor, F. M. O., Paynter, D., Samset, B. H., Sellar, A., Shindell, D., Takemura, T.,  
1367 Tilmes, S., and Wu, T.: Historical total ozone radiative forcing derived from CMIP6 simulations, *npj Clim. Atmos. Sci.*, 3, 32,  
1368 <https://doi.org/10.1038/s41612-020-00131-0>, 2020.

1369 Smith, C. J., Kramer, R. J., Myhre, G., Forster, P. M., Soden, B. J., Andrews, T., Boucher, O., Faluvegi, G., Fläschner, D.,  
1370 Hodnebrog, Ø., Kasoar, M., Kharin, V., Kirkevåg, A., Lamarque, J.-F., Mülmenstädt, J., Olivie, D., Richardson, T., Samset,  
1371 B. H., Shindell, D., Stier, P., Takemura, T., Voulgarakis, A., and Watson-Parris, D.: Understanding Rapid Adjustments to  
1372 Diverse Forcing Agents, *Geophys. Res. Lett.*, 45, 12,023–12,031, <https://doi.org/10.1029/2018GL079826>, 2018a.

1373 Smith, C. J., Forster, P. M., Allen, M., Leach, N., Millar, R. J., Passerello, G. A., and Regayre, L. A.: FAIR v1.3: A simple  
1374 emissions-based impulse response and carbon cycle model, *Geoscientific Model Development*, 11, 2273–2297,  
1375 <https://doi.org/10.5194/gmd-11-2273-2018>, 2018b.

1376 Smith, C. J., Harris, G. R., Palmer, M. D., Bellouin, N., Collins, W., Myhre, G., Schulz, M., Golaz, J.-C., Ringer, M.,  
1377 Storelvmo, T., and Forster, P. M.: Energy Budget Constraints on the Time History of Aerosol Forcing and Climate Sensitivity,  
1378 *Journal of Geophysical Research: Atmospheres*, 126, e2020JD033622, <https://doi.org/10.1029/2020JD033622>, 2021a.

1379 Smith, C., Nicholls, Z. R. J., Armour, K., Collins, W., Forster, P., Meinshausen, M., Palmer, M. D., and Watanabe, M.: The  
1380 Earth’s Energy Budget, Climate Feedbacks, and Climate Sensitivity Supplementary Material, in: *Climate Change 2021: The*  
1381 *Physical Science Basis. Contribution of Working Group I to the Sixth Assessment Report of the Intergovernmental Panel on*  
1382 *Climate Change*, edited by: Masson-Delmotte, V., Zhai, P., Pirani, A., Connors, S. L., Péan, C., Berger, S., Caud, N., Chen,  
1383 Y., Goldfarb, L., Gomis, M. I., Huang, M., Leitzell, K., Lonnoy, E., Matthews, J. B. R., Maycock, T. K., Waterfield, T.,  
1384 Yelekçi, O., Yu, R., and Zhou, B., 2021b.

1385 Smith, C., Cummins, D. P., Fredriksen, H.-B., Nicholls, Z., Meinshausen, M., Allen, M., Jenkins, S., Leach, N., Mathison, C.,  
1386 and Partanen, A.-I.: fair-calibrate v1.4.1: calibration, constraining, and validation of the FaIR simple climate model for reliable  
1387 future climate projections, *Geosci. Model Dev.*, 17, 8569–8592, <https://doi.org/10.5194/gmd-17-8569-2024>, 2024.

1388 Stevenson, D. S., Young, P. J., Naik, V., Lamarque, J.-F., Shindell, D. T., Voulgarakis, A., Skeie, R. B., Dalsoren, S. B.,  
1389 Myhre, G., Berntsen, T. K., Folberth, G. A., Rumbold, S. T., Collins, W. J., MacKenzie, I. A., Doherty, R. M., Zeng, G., van  
1390 Noije, T. P. C., Strunk, A., Bergmann, D., Cameron-Smith, P., Plummer, D. A., Strode, S. A., Horowitz, L., Lee, Y. H., Szopa,  
1391 S., Sudo, K., Nagashima, T., Josse, B., Cionni, I., Righi, M., Eyring, V., Conley, A., Bowman, K. W., Wild, O., and Archibald,  
1392 A.: Tropospheric ozone changes, radiative forcing and attribution to emissions in the Atmospheric Chemistry and Climate  
1393 Model Intercomparison Project (ACCMIP), *Atmos. Chem. Phys.*, 13, 3063–3085, <https://doi.org/10.5194/acp-13-3063-2013>,  
1394 2013.

1395 Steiner, A. K., Ladstädter, F., Randel, W. J., Maycock, A. C., Fu, Q., Claud, C., Gleisner, H., Haimberger, L., Ho, S.-P.,  
1396 Keckhut, P., Leblanc, T., Mears, C., Polvani, L. M., Santer, B. D., Schmidt, T., Sofieva, V., Wing, R., and Zou, C.-Z.: Observed  
1397 Temperature Changes in the Troposphere and Stratosphere from 1979 to 2018, *J. Climate*, 33, 8165–8194,  
1398 <https://doi.org/10.1175/JCLI-D-19-0998.1>, 2020.

1399 Sun, W., Li, Q., Huang, B., Cheng, J., Song, Z., Li, H., Dong, W., Zhai, P., and Jones, P.: The Assessment of Global Surface  
1400 Temperature Change from 1850s: The C-LSAT2.0 Ensemble and the CMST-Interim Datasets, *Advances in Atmospheric*  
1401 *Sciences*, 38, 875–888, <https://doi.org/10.1007/s00376-021-1012-3>, 2021.

1402 Szopa, S., V. Naik, B. Adhikary, P. Artaxo, T. Berntsen, W.D. Collins, S. Fuzzi, L. Gallardo, A. Kiendler-Scharr, Z. Klimont,  
1403 H. Liao, N. Unger, and P. Zanis: Short-Lived Climate Forcers. In *Climate Change 2021: The Physical Science Basis*.  
1404 Contribution of Working Group I to the Sixth Assessment Report of the Intergovernmental Panel on Climate Change [Masson-  
1405 Delmotte, V., P. Zhai, A. Pirani, S.L. Connors, C. Péan, S. Berger, N. Caud, Y. Chen, L. Goldfarb, M.I. Gomis, M. Huang, K.  
1406 Leitzell, E. Lonnoy, J.B.R. Matthews, T.K. Maycock, T. Waterfield, O. Yelekçi, R. Yu, and B. Zhou (eds.)]. Cambridge  
1407 University Press, Cambridge, United Kingdom and New York, NY, USA, pp. 817–922,  
1408 <https://doi:10.1017/9781009157896.008>, 2021.

1409 Taha, G., Loughman, R., Zhu, T., Thomason, L., Kar, J., Rieger, L., and Bourassa, A.: OMPS LP Version 2.0 multi-wavelength  
1410 aerosol extinction coefficient retrieval algorithm, *Atmos. Meas. Tech.*, 14, 1015–1036, [https://doi.org/10.5194/amt-14-1015-](https://doi.org/10.5194/amt-14-1015-2021)  
1411 [2021](https://doi.org/10.5194/amt-14-1015-2021), 2021.

1412 Taylor, K. E., Crucifix, M., Braconnot, P., Hewitt, C. D., Doutriaux, C., Broccoli, A. J., Mitchell, J. F. B., and Webb, M. J.:  
1413 Estimating Shortwave Radiative Forcing and Response in Climate Models, *J. Climate*, 20, 2530–2543,  
1414 <https://doi.org/10.1175/JCLI4143.1>, 2007.

1415 Thomason, L. W., Ernest, N., Millán, L., Rieger, L., Bourassa, A., Vernier, J.-P., Manney, G., Luo, B., Arfeuille, F., and Peter,  
1416 T.: A global space-based stratospheric aerosol climatology: 1979–2016, *Earth Syst. Sci. Dat.*, 10, 469–492,  
1417 <https://doi.org/10.5194/essd-10-469-2018>, 2018.

1418 Thornhill, G. D., Collins, W. J., Kramer, R. J., Olivíe, D., Skeie, R. B., O'Connor, F. M., Abraham, N. L., Checa-Garcia, R.,  
1419 Bauer, S. E., Deushi, M., Emmons, L. K., Forster, P. M., Horowitz, L. W., Johnson, B., Keeble, J., Lamarque, J.-F., Michou,  
1420 M., Mills, M. J., Mulcahy, J. P., Myhre, G., Nabat, P., Naik, V., Oshima, N., Schulz, M., Smith, C. J., Takemura, T., Tilmes,  
1421 S., Wu, T., Zeng, G., and Zhang, J.: Effective radiative forcing from emissions of reactive gases and aerosols – a multi-model  
1422 comparison, *Atmos. Chem. Phys.*, 21, 853–874, <https://doi.org/10.5194/acp-21-853-2021>, 2021a.

1423 Thornhill, G., Collins, W., Olivíe, D., Skeie, R. B., Archibald, A., Bauer, S., Checa-Garcia, R., Fiedler, S., Folberth, G.,  
1424 Gjermundsen, A., Horowitz, L., Lamarque, J.-F., Michou, M., Mulcahy, J., Nabat, P., Naik, V., O'Connor, F. M., Paulot, F.,  
1425 Schulz, M., Scott, C. E., Séférian, R., Smith, C., Takemura, T., Tilmes, S., Tsigaridis, K., and Weber, J.: Climate-driven  
1426 chemistry and aerosol feedbacks in CMIP6 Earth system models, *Atmos. Chem. Phys.*, 21, 1105–1126,  
1427 <https://doi.org/10.5194/acp-21-1105-2021>, 2021b.

1428 Toohey, M. and Sigl, M.: Volcanic stratospheric sulfur injections and aerosol optical depth from 500\,BCE to 1900\,CE, *Earth*  
1429 *Syst. Sci. Data*, 9, 809–831, <https://doi.org/10.5194/essd-9-809-2017>, 2017.

1430 Trewin, B., Cazenave, A., Howell, S., Huss, M., Isensee, K., Palmer, M. D., Tarasova, O., and Vermeulen, A.: Headline  
1431 Indicators for Global Climate Monitoring, *Bulletin of the American Meteorological Society*, 102, E20–E37,  
1432 <https://doi.org/10.1175/BAMS-D-19-0196.1>, 2021.

1433 Vanderkelen, I., van Lipzig, N. P. M., Lawrence, D. M., Droppers, B., Golub, M., Gosling, S. N., Janssen, A. B. G., Marcé,  
1434 R., Schmied, H. M., Perroud, M., Pierson, D., Pokhrel, Y., Satoh, Y., Schewe, J., Seneviratne, S. I., Stepanenko, V. M., Tan,  
1435 Z., Woolway, R. I., and Thiery, W.: Global Heat Uptake by Inland Waters, *Geophysical Research Letters*, 47, e2020GL087867,  
1436 <https://doi.org/10.1029/2020GL087867>, 2020.

1437 Vose, R. S., Huang, B., Yin, X., Arndt, D., Easterling, D. R., Lawrimore, J. H., Menne, M. J., Sanchez-Lugo, A., and Zhang,  
1438 H. M.: Implementing Full Spatial Coverage in NOAA's Global Temperature Analysis, *Geophys. Res. Lett.*, 48,  
1439 e2020GL090873, <https://doi.org/10.1029/2020GL090873>, 2021.

1440 Watson-Parris, D., Christensen, M. W., Laurenson, A., Clewley, D., Gryspeerdt, E., and Stier, P.: Shipping regulations lead to  
1441 large reduction in cloud perturbations, *Proc. Natl. Acad. Sci. U.S.A.*, 119, e2206885119,  
1442 <https://doi.org/10.1073/pnas.2206885119>, 2022.

1443 van der Werf, G. R., Randerson, J. T., Giglio, L., van Leeuwen, T. T., Chen, Y., Rogers, B. M., Mu, M., van Marle, M. J. E.,  
1444 Morton, D. C., Collatz, G. J., Yokelson, R. J., and Kasibhatla, P. S.: Global fire emissions estimates during 1997–2016, *Earth  
1445 System Science Data*, 9, 697–720, <https://doi.org/10.5194/essd-9-697-2017>, 2017.

1446 van der Werf, G.R., Randerson, J.T., van Wees, D. et al. Landscape fire emissions from the 5th version of the Global Fire  
1447 Emissions Database (GFED5). *Sci Data* 12, 1870, <https://doi-org.insu.bib.cnrs.fr/10.1038/s41597-025-06127-w>, 2025.

1448 Wild, O., Prather, M. J., and Akimoto, H.: Indirect long-term global radiative cooling from NO<sub>x</sub> emissions, *Geophys. Res.  
1449 Lett.*, 28, 1719–1722, <https://doi.org/10.1029/2000GL012573>, 2001.

1450 World Meteorological Organization (WMO), 2025. State of the Global Climate 2024. WMO-No. 1368. World Meteorological  
1451 Organization, <https://library.wmo.int/idurl/4/69455>, accessed 27 April 2025, 2025.

1452 WMO: State of the Global Climate 2026, World Meteorological Organization, Geneva, Switzerland,  
1453 <https://doi.org/10.59327/WMO/S/CRI/SOC/1>, 2025.

1454 Yin, X., Huang, B., Menne, M., Vose, R., Zhang, H.-M., Adeyeye, A., Applequist, S., Gleason, K., Liu, C., and Sanchez-Lugo,  
1455 A.: NOAA GlobalTemp Version 6: An AI-Based Global Surface Temperature Dataset, *Bulletin of the American  
1456 Meteorological Society*, 105, E2184–E2193, <https://doi.org/10.1175/BAMS-D-24-0012.1>, 2024.

1457 Yuan, T., Song, H., Wood, R., Wang, C., Oreopoulos, L., Platnick, S. E., Von Hippel, S., Meyer, K., Light, S., and Wilcox,  
1458 E.: Global reduction in ship-tracks from sulfur regulations for shipping fuel, *Sci. Adv.*, 8, eabn7988,  
1459 <https://doi.org/10.1126/sciadv.abn7988>, 2022.

1460 Zelinka, M. D., Andrews, T., Forster, P. M., and Taylor, K. E.: Quantifying components of aerosol-cloud-radiation interactions  
1461 in climate models, *J. Geophys. Res.-Atmos.*, 119, 7599–7615, <https://doi.org/10.1002/2014JD021710>, 2014.

1462 Zelinka, M. D., Smith, C. J., Qin, Y., and Taylor, K. E.: Aerosol Effective Radiative Forcings in CMIP Models, *EGU sphere*,  
1463 <https://acp.copernicus.org/articles/23/8879/2023>, 2023.

1464  
1465  
1466
